1 Secrets of the hospital underbelly: abundance of antimicrobial resistance genes in hospital  
2 wastewater reflects hospital antimicrobial use and inpatient length of stay

3

4

5 Meghan R. Perry<sup>1,2,3\*</sup>, Bram van Bunnik<sup>4\*</sup>, Luke McNally<sup>1,5,6</sup>, Bryan Wee<sup>4</sup>, Patrick Munk<sup>7</sup>,  
6 Amanda Warr<sup>8</sup>, Barbara Moore<sup>3</sup>, Pota Kalima<sup>3</sup>, Carol Philip<sup>3</sup>, Ana Maria de Roda Husman<sup>9</sup>,  
7 Frank Aarestrup<sup>7</sup>, Mark Woolhouse<sup>1,4</sup>

8

9 Meghan R Perry and Bram van Bunnik contributed equally to this work

10

#### 11 Affiliations

12 1. Centre for Immunity, Infection and Evolution, University of Edinburgh, Edinburgh,  
13 UK

14 2. Centre for Inflammation Research, University of Edinburgh, Edinburgh, UK

15 3. Regional Infectious Diseases Unit, Western General Hospital, Edinburgh, UK

16 4. Usher Institute, University of Edinburgh, Edinburgh, UK

17 5. Centre for Synthetic and Systems Biology, School of Biological Sciences, University  
18 of Edinburgh, Edinburgh, UK

19 6. Institute of Evolutionary Biology, School of Biological Sciences, University of  
20 Edinburgh, Edinburgh, UK

21 7. National Food Institute, Technical University of Denmark, Kgs. Lyngby 2800,  
22 Denmark

23 8. Roslin Institute, University of Edinburgh, Edinburgh, UK

24 9. National Institute for Public Health and the Environment (RIVM), Bilthoven 3721, The  
25 Netherlands

**NOTE: This preprint reports new research that has not been certified by peer review and should not be used to guide clinical practice.**

26 **ABSTRACT**

27 Introduction

28 Hospital wastewater is a potential major source of antimicrobial resistance (AMR). This study  
29 uses metagenomics to ask how abundances of AMR genes in hospital wastewater are related  
30 to clinical activity.

31 Methods

32 Sewage was collected over a 24-hour period from multiple wastewater collection points  
33 representing different specialties within a tertiary hospital site and simultaneously from  
34 community sewage works. High throughput shotgun sequencing was performed using Illumina  
35 HiSeq4000. AMR gene abundances were correlated to hospital antimicrobial usage (AMU),  
36 data on clinical activity and resistance prevalence in clinical isolates.

37 Findings

38 Microbiota and AMR gene composition varied between each collection point and overall AMR  
39 gene abundance was higher in hospital wastewater than in community influent. The  
40 composition of AMR genes correlated with microbiota composition (Procrustes analysis,  
41  $p=0.002$ ). Increased antimicrobial consumption at a class level was associated with higher  
42 AMR gene abundance within that class in wastewater (incidence rate ratio 2.80, C.I. 1.2-6.5,  
43  $p=0.016$ ). Prolonged average patient length of stay was associated with higher total AMR gene  
44 abundance in wastewater (incidence rate ratio 2.05, C.I. 1.39-3.01,  $p=0.0003$ ). AMR gene  
45 abundance at a class level within hospital wastewater did not reflect resistance patterns in the  
46 181 clinical isolates grown from hospital inpatients over the time of wastewater sampling.

47 Conclusions

48 Hospital antimicrobial consumption and patient length of stay are important drivers of AMR  
49 gene outflow into the environment. Using metagenomics to identify the full range of AMR

50 genes in hospital wastewater could represent a useful surveillance tool to monitor hospital

51 AMR gene outflow and guide environmental policy on AMR.

52

## 53 INTRODUCTION

54 In response to the antimicrobial resistance (AMR) crisis, a challenge for the research and  
55 medical communities is understanding the flow of AMR between different environmental  
56 niches<sup>1</sup> and deciding where to focus surveillance and interventions to inform effective policies  
57 and action<sup>2</sup>. There is an increasing interest in the contribution of hospital wastewater to AMR  
58 in the environment. Sewage treatment does not completely eradicate AMR genes and thus  
59 AMR genes can enter the food chain through water and the use of sewage sludge in  
60 agriculture<sup>3,4</sup>. As a complex matrix representing human bodily waste the potential of  
61 community sewage as a surveillance tool to monitor the global epidemiology of AMR has  
62 recently been explored<sup>5</sup>.

63 Hospitals are epidemiologically important nodal points for concentrated antimicrobial  
64 consumption and are sources of resistant pathogens<sup>6</sup>. Secondary care surveillance, guided by  
65 national and international policies<sup>7,8</sup>, is based on passive reporting of phenotypic laboratory  
66 results for specific pathogens or from screening samples on specific high risk patients<sup>9,10</sup>. These  
67 methods will not represent the full impact of antimicrobial use and inpatient activity on AMR  
68 carriage within a hospital, and thus risk of transmission, or capture all pertinent antimicrobial  
69 resistance genes (AMR genes). As hospital wastewater contains inpatient bodily waste we  
70 hypothesised that it could be used as a representation of inpatient community carriage of AMR  
71 and as such may be a useful surveillance tool.

72 Many previous studies have identified key pathogens and resistant genes in hospital  
73 wastewater<sup>11-16</sup> and some attempts have been made to correlate resistance of specific organisms  
74 in hospital clinical isolates with resistance in hospital wastewater with conflicting results<sup>17-19</sup>.  
75 There is currently a knowledge gap on how resistance in hospital wastewater quantitatively  
76 reflects clinical activity within hospitals. By applying the technique of metagenomics<sup>5</sup> to obtain

77 a universal view of AMR gene composition in hospital wastewater in this study we were able  
78 to interrogate this relationship in a multi-departmental study.

79

## 80 **METHODS**

### 81 **Sewage collection and antibiotic residue analysis**

82 Sampling was performed in June 2017 on eight wastewater collection points (CP), representing  
83 different clinical departments, identified to capture the effluent from the majority of the  
84 Western General Hospital, Edinburgh (Supplementary Figure 1). Using composite sampling  
85 machines, 100 mL of wastewater was sampled every 15 minutes over a 24-hour period thus  
86 aiming to collect a representative sample of the hospital inpatient population. Simultaneously,  
87 a 24-hour time proportional sample was collected at the inflow site to Seafield community  
88 sewage works, which serves a population equivalent of 760,000 from Edinburgh and the  
89 Lothians. Samples were transported from the site on dry ice and stored at -80°C. Antibiotic  
90 residue analysis was performed on 1L of composite hospital wastewaters and 1L of domestic  
91 sewage using LC-MS/MS as previously described<sup>5,20</sup>.

### 92 **DNA extraction and analysis**

93 DNA was extracted from sewage using the QIAamp Fast DNA Stool mini kit with an optimized  
94 protocol as previously described<sup>21</sup> and sequenced on the HiSeq4000 platform (Illumina) using  
95 2x 150bp paired-end sequencing. Paired reads were then assigned using Kraken2<sup>22</sup> and a  
96 database of known vector sequences, UniVec\_Core (downloaded 9<sup>th</sup> April 2019). Taxonomic  
97 assignments were summarized at the genus level using kraken-biom<sup>23</sup>. One sample, CP2, was  
98 heavily contaminated and removed from further analysis. Using the ResFinder database within  
99 the MGMapper web tool, functional metagenomic antibiotic resistance determinants were  
100 identified<sup>24</sup>.

### 101 **Data collection**

102 Data was collected on clinical isolates from the week surrounding the hospital wastewater  
103 sampling to represent pathogens in hospital inpatients. All types of clinical isolate were  
104 included but duplicate samples from the same patient within a 48-hour period were omitted  
105 from the final analysis. Antimicrobial usage was collated in the form of weekly pharmacy  
106 issues to each ward over the 3 months prior to sampling and presented as defined daily dose  
107 per 100 occupied bed days (DDD/100OBDs). Pharmacy issues for prescriptions for outpatient  
108 use and for theatres were excluded.

### 109 **Data analysis**

110 All statistical analysis and plots were produced using R version 3.6.0<sup>25</sup>.  
111 Using the output from Kraken and Resfinder the relative abundance of AMR genes and  
112 bacterial genera were calculated as FPKM (Fragments Per Kilobase of transcript per Million  
113 mapped bacterial reads) to account for both sample-wise sequencing depth differences and  
114 size-dependent probability of observing a reference<sup>26</sup>. Relative abundances and dissimilarity  
115 matrices of bacterial genera and AMR genes were determined and the top 50 AMR genes were  
116 visualised using a heatmap with gene-wise and collection point dendograms as previously  
117 described<sup>5</sup>. Procrustes analysis was used to test the association between the resistome and  
118 bacteriome dissimilarities.

### 119 **Correlation between inpatient activity and AMR gene abundance**

120 The source of variance in the abundance of AMR genes between the collection points was  
121 investigated using a multilevel Poisson model with the dependent variable as counts of AMR  
122 gene reads at each collection point aggregated at the class level, offset by the log of the average  
123 gene-length per antibiotic class multiplied by the total bacterial reads per collection point.  
124 Random effects of collection point, antimicrobial class and observation were included in the  
125 model, the latter to model the over dispersion inherent to count data<sup>27</sup>.

126 Each of the potential fixed effects were evaluated for correlation. If two variables were highly  
127 correlated ( $>0.7$ ) only one variable was chosen (based on lowest Akaike information criterion,  
128 AIC). Using AMU in DDD per 100 OBD at the collection point level we accounted for co- and  
129 cross-resistance by fitting both a measure of direct selection for resistance (effect of usage of  
130 one antimicrobial class on AMR genes that confer resistance to that antimicrobial class) and  
131 indirect selection (effect of total AMU on AMR gene abundance).

132 To assess the relationship between AMR in clinical isolates and AMR gene abundance in  
133 hospital wastewater a binomial generalised linear mixed effects model was used including the  
134 same three random effects with an addition of a random effect of species to control for inter-  
135 species heterogeneity. Isolate type was included in the model as urinary/faecal or non-urinary  
136 due to the different dynamics of inpatient bodily waste being represented in the wastewater  
137 system. A similar model was additionally used to evaluate the relationship between AMR in  
138 clinical isolates and AMU of the inpatient community.

### 139 **Ethics**

140 This study was conducted following approval from NHS Lothian Research and Development  
141 committee under the sponsorship of University of Edinburgh. There was no direct patient  
142 contact and therefore the study did not require ethical board approval.

143

## 144 **RESULTS**

145 The hospital departments served by the wastewater collection points differed by pattern of  
146 antimicrobial use (Table 1, Supplementary Figure 2) and resistance in the 181 clinical isolates  
147 identified in the week surrounding wastewater sampling (Supplementary Figure 3).

### 148 **Metagenomics of wastewater**

149 An average read pair count of 38.5 million (range 35.8-39.2 million) was obtained with an  
150 average of 76% (range 67-81%) of reads allocated to bacteria from the seven hospital

151 wastewater samples and one community sewage sample (sequencing reads can be found  
152 under Bioproject accession number PRJEB34410). An average of 0.08% of reads mapped to  
153 AMR genes in the seven hospital wastewater samples versus 0.03% from Seafield  
154 community sewage works (Supplementary Table 1).  
155  
156 One thousand and forty-seven unique bacterial genera were detected across all samples (range  
157 705-965 genera per sample, Supplementary Table 2). The top nineteen genera accounted for  
158 >60% of bacterial abundance in all samples (Figure 1, panel D). The most predominant genera  
159 were *Pseudomonas* and *Acinetobacter*, mainly environmental species such as *Pseudomonas*  
160 *fluorsecens*, *Acinetobacter johnsonii*, likely representing bacteria from biofilms within the  
161 hospital pipes. When compared with the Seafield community sewage sample, there was a  
162 difference in diversity with a higher predominance of gut associated bacteria including  
163 *Faecalibacterium*, *Bacteroides*, *Bifidobacterium* and *Escherichia* in the hospital samples.  
164 (Figure 1, Panel B & D).  
165 AMR gene abundance and composition varied across different hospital collection points and  
166 Seafield (Figures 1 panel A & C, Figure 2, Supplementary Figures 4 & 6). Apart from the  
167 wastewater collected at CP4 which houses patients directly admitted from the community,  
168 AMR gene abundance from hospital effluent was higher than AMR gene abundance in Seafield  
169 community sewage works (Figure 2, Supplementary Fig 4). AMR gene composition was  
170 strongly correlated with bacterial genus level composition (Procrustes,  $p=0.002$ )  
171 (Supplementary Figure 5).  
172 Over 60% of the resistome of hospital wastewater and community sewage samples is composed  
173 of the 15 most abundant genes (Supplementary Figure 6), mainly belonging to the  
174 aminoglycoside and macrolide antimicrobial classes (Figure 1, panel C). In total, we detected  
175 168 different resistance genes belonging to ten different antimicrobial classes (Supplementary



176 Table 3). The genes detected included key AMR genes of interest to infection control including  
177 blaOXA, blaIMP and genes of the VanA cassette.

### 178 **Inpatient activity and AMR gene abundance**

179 With increasing usage of an antimicrobial class there was a significant increase in the  
180 abundance of AMR genes belonging to that class (incidence rate ratio (IRR) 2.80, C.I. 1.2-6.5,  
181  $p=0.016$ , Figure 3). No relationship between total AMU per collection point and total AMR  
182 gene abundance was identified implying that cross- resistance is not extensively contributing  
183 to AMR gene abundance. The abundance of AMR genes increased with increasing patient  
184 length of stay (IRR 2.05, C.I. 1.39-3.01,  $p=0.0003$ , Figure 3). This result is not because of  
185 increasing AMU with increasing LOS as these two variables are not correlated at collection  
186 point level but instead likely reflects transmission amongst hospital inpatients. A minor but  
187 significant interaction was identified between length of stay and DDDs per 100 OBDs which  
188 implies that following a certain degree of antimicrobial exposure and hospital exposure through  
189 length of stay there is no longer a cumulative effect on AMR gene abundance. The effect of  
190 patient age was not significant.

191  
192 Stratifying for species heterogeneity, AMR gene abundance at a class level within hospital  
193 wastewater did not reflect resistance patterns in the clinical isolates from hospital inpatients  
194 around the time of wastewater sampling (Supplementary Table 4). There was no difference  
195 between the relationship of the directly excreted urinary and faecal isolates with AMR gene  
196 abundance and other isolate types e.g. skin which would only reach the wastewater system  
197 indirectly via run off from showers. At an antimicrobial class level the resistance observed in  
198 clinical isolates did not reflect the antimicrobial usage of that class in the preceding 3 months.  
199

200 Analysis of antibiotic residues in hospital effluent and community influent reflected the high  
201 AMU within the hospital with an average 12-fold increased concentration in hospital effluent  
202 (ranging between 4 and 13  $\mu\text{L}^{-1}$ ) for the five classes measured (Supplementary Figure 7). Our  
203 residue data only represents the residue levels from the whole hospital and not individual  
204 collection points and thus cannot be specifically correlated with AMR gene abundance.

205

## 206 **DISCUSSION**

207 This study identified that hospital AMU and patient length of stay impacts AMR gene  
208 abundances in hospital effluent and has implications upstream for infection control in the  
209 hospital and downstream for AMR in the environment. Overall, the distribution of bacterial  
210 genera and AMR genes in our hospital wastewater samples and domestic sewage sample is  
211 similar to previous described sewage composition in European regions<sup>5,28</sup>.

212 There are different plausible explanations for the positive relationship between AMU and AMR  
213 gene abundance. These include inpatient faecal and urinary carriage of AMR genes both from  
214 direct antimicrobial exposure and from transmission between patients. However, exposure of  
215 environmental bacteria in the hospital waste pipes, which may reside in biofilms for months,  
216 to high levels of unmetabolised excreted antimicrobials from patients is also likely to play a  
217 significant role<sup>29</sup>. Indeed, our data shows that the hospital antimicrobial residues are within  
218 the minimum selection concentration range for some pathogen antimicrobial combinations e.g.  
219 *Escherichia coli* and ciprofloxacin resistance<sup>30</sup>. A relationship has been previously observed at  
220 a country level both between both AMU and antimicrobial residue levels and AMU and AMR  
221 gene abundance in sewage<sup>5</sup>.

222 The implications of the relationship between AMU and AMR gene abundance in wastewater  
223 can be illustrated by the strong correlation between abundance of carbapenem resistance genes  
224 and carbapenem consumption ( $R^2=0.87$ ). Where a particular ward or department consumes

225 high levels of carbapenem then this work demonstrates that there could be high levels of  
226 undetected faecal or urinary carriage of carbapenem resistance genes which could warrant more  
227 stringent isolation of these patients, in fitting with concerns about “unsampled transmission  
228 chains” in carbapenem-resistant *Enterobacteriaceae*<sup>31</sup>. Alternatively, or in addition to, if the  
229 70% renal excretion of unchanged meropenem is selecting out resistant organisms in the pipes  
230 for release into the environment then procedures for the bodily waste of patients on meropenem  
231 may need to be reconsidered.

232 The positive effect of increasing length of stay on AMR gene abundance is in keeping with  
233 prolonged duration of inpatient stay being a risk factor for carriage and infection with resistant  
234 microorganisms<sup>32–34</sup>. That length of stay remains as a signal even despite controlling for  
235 antimicrobial consumption supports the theory of transmission of antimicrobial resistant  
236 organisms amongst patients and their local environment during their inpatient stay. This has  
237 further implications for hospital infection control management of long stay patients as they  
238 may be more likely to harbour key AMR genes<sup>32,35</sup> and be a source for transmission.

239 As the majority of AMR genes are carried by non-pathogenic commensal bacteria<sup>36</sup> the  
240 advantage of using metagenomics is that we are able to capture AMR genes carried by the wide  
241 variety of bacterial genera identified. Although shotgun sequencing cannot identify which  
242 bacteria are carrying which AMR genes our results indicate that the AMR genes present are  
243 highly correlated with the bacteria identified at that collection point (Supplementary Fig 7).  
244 This can explain why levels of AMR genes for aminoglycosides, tetracyclines and macrolides  
245 may be higher than expected in relation to phenotypic resistance in clinical isolates; the  
246 composition of bacterial genera selected out may have intrinsic or high levels of resistance to  
247 these antimicrobial classes. The potential for transfer of AMR genes within the sewage network  
248 onto human pathogens has been demonstrated indicating the importance of obtaining a  
249 universal view of AMR genes<sup>16</sup>.

250 No quantitative relationship was observed between clinical isolates stratified by organism and  
251 isolate type and AMR gene abundance in hospital wastewater. There are multiple possible  
252 explanations for this. The clinical isolates grown were only 7% of all microbiological samples  
253 taken and only represent a selected group of hospital patients whereas the hospital wastewater  
254 represents the carriage of the whole inpatient population. Faecal or urinary resistance carriage  
255 is often present on non-pathogenic organisms and does not always progress to clinical disease  
256 represented by clinical isolate growth. In addition, other biological niches of human resistance  
257 carriage that will not well be represented in our hospital wastewater samples. The lack of  
258 relationship could also be due to the inherent issues of correlating phenotypic resistance and  
259 genotypic resistance and the loss of resolution in allocating resistances into antimicrobial  
260 classes rather than individual drugs. In addition, it may be because different relationships exist  
261 at an organism and AMR gene level in sewage which are lost in trying to compare the two  
262 microbial communities. A recent study using EARS-net clinical isolate data and urban sewage  
263 samples found correlations in only a small proportion of pathogen-antimicrobial relationships  
264 studied<sup>37</sup>. Due to conflicting relationships in the literature<sup>11,12,14,37</sup>, further detailed work on  
265 specific organisms, isolate types and resistance in sewage is required to interrogate these  
266 relationships further.

267 No relationship was identified between AMU in the previous 3 months and resistance in  
268 clinical isolates stratified by species and isolate type. This can also be explained by many of  
269 the reasons discussed above. Previous literature examining this has only found a relationship  
270 between specific organisms and antibiotics over a much longer time period<sup>38,39</sup>.

271 There was a higher abundance of AMR genes in the hospital wastewater samples when  
272 compared to Seafield community sewage works. This is likely due to dilution, a general loss  
273 of AMR-gene carrying human commensal bacteria in the environment of sewerage system<sup>40</sup>  
274 and exposure to lower levels of antibiotic residues. When comparing sewage influent in paired

275 communities with and without a hospital Buelow *et al* concluded that there was minimal effect  
276 of a hospital on community influent<sup>28</sup>. However, in other work, hospital wastewater impacted  
277 resistome composition at an individual gene level<sup>41</sup>. It is worth noting that the AMR gene  
278 abundance in our urban sewage influent (Seafield community sewage works), which receives  
279 the hospital wastewater from our studied hospital and another large tertiary hospital, is higher  
280 than the hospital wastewater collected in CP4, the admissions unit which is our closest  
281 representation of community AMR carriage. Concern has been raised relating to the impact of  
282 hospital wastewater on urban influent and effluent and specific water treatments for hospital  
283 wastewater have been called for. This work highlights the concept that physicians should  
284 consider, where possible, prescribing of environmentally degradable antimicrobials e.g. beta-  
285 lactams over those antimicrobials which have persistent residues which are mobile between  
286 environmental niches e.g. tetracycline to minimise the impact of antimicrobials on the  
287 environmental resistome<sup>42</sup>. The ultimate effect of environmental AMR genes on human health  
288 is an ongoing important research question<sup>29</sup>.

289 One of the strengths of this study is the use of metagenomics to quantify resistance genes to a  
290 wide range of antibiotics. This technique would also allow for retrospective investigation if  
291 new resistance genes emerge. However, when, as in this analysis, antibiotics and AMR genes  
292 are grouped together at a class level detail can be lost and there are incidences when looking  
293 for specific pathogens and resistance genes is warranted. The use of 24-hour composite  
294 samplers is a strong technique to give a representative sample of the hospital but it must be  
295 considered that hospital staff, outpatients and visitors will have also contributed to the effluent.  
296 In addition, a proportion of patients will have moved around the hospital during the period  
297 studied. Although this study is limited to one hospital site at one time point the variation in  
298 antimicrobial use and inpatient characteristics in each department has allowed us to treat them

299 as discrete treatment centres and draw conclusions about factors affecting AMR gene  
300 abundance.

301 There is little doubt that hospital resistant pathogens can be abundant in wastewater  
302 systems<sup>15,16,18</sup>. The results from this study imply that the place for measuring AMR genes using  
303 this novel tool of using metagenomics to analyse hospital wastewater is not to comment on  
304 resistance in clinical isolates within the hospital. Rather its utility could fall on representing  
305 carriage of AMR in hospital inpatients and hospital pipes and identification of emerging key  
306 AMR genes in relation to changing patterns of transmission, infection control policies and  
307 antimicrobial usage. Further work evaluating using spot samples and optimal collection points  
308 of hospital wastewater would be required.

309 In conclusion, we show in a multi-departmental study that AMR gene abundance in hospital  
310 wastewater is influenced by hospital AMU and length of inpatient stay. Our study further  
311 emphasises the AMR gene transmission risks of exposure to high antimicrobial consuming and  
312 high resistance carriage environments. Hospital wastewater is an important source of AMR  
313 into the environment and should be considered in environmental policy to reduce the flow of  
314 AMR between different environmental reservoirs.

315 ***Acknowledgements***

316 The authors would like to thank NHS Lothian estates and Scottish Water for their help with the  
317 sampling and Mick Watson for his laboratory support.

318 ***Author contributions***

319 MRP conceived the project and developed it with input from BvB, FA and MW. MRP  
320 facilitated sampling and DNA extraction with AW. PK, CP and BM provided clinical and  
321 pharmaceutical databases and input. ARH facilitated antibiotic residue analysis. Bio-  
322 informatics and analyses by BvB, LMcN, BW, PM and MRP with input from FA and MW.  
323 Manuscript drafted by MRP with input from BVB and review and comments from all authors.

324 ***Financial support***

325 MRP was funded by Academy of Medical Sciences (SGL016\_1086) and an Institutional  
326 Strategic Support Fund from University of Edinburgh. BvB, LMcN, MW, PM and FA were  
327 funded by The Novo Nordisk Foundation (NNF16OC0021856: Global Surveillance of  
328 Antimicrobial Resistance).

329

330

331

332

333

334

335

336

## 337 **References**

- 338 1. Woolhouse, M., Ward, M., van Bunnik, B. & Farrar, J. Antimicrobial resistance in  
339 humans, livestock and the wider environment. *Philos. Trans. R. Soc. B Biol. Sci.* **370**,  
340 (2015).
- 341 2. Laxminarayan, R., Sridhar, D., Blaser, M., Wang, M. & Woolhouse, M. Achieving global  
342 targets for antimicrobial resistance. *Science* **353**, 874–875 (2016).
- 343 3. Woolhouse, M. E. J. & Ward, M. J. Sources of Antimicrobial Resistance. *Science* **341**,  
344 1460–1461 (2013).
- 345 4. Bréchet, C. *et al.* Wastewater Treatment Plants Release Large Amounts of Extended-  
346 Spectrum  $\beta$ -Lactamase–Producing *Escherichia coli* Into the Environment. *Clin. Infect.*  
347 *Dis.* **58**, 1658–1665 (2014).
- 348 5. Hendriksen, R. S. *et al.* Global monitoring of antimicrobial resistance based on  
349 metagenomics analyses of urban sewage. *Nat. Commun.* **10**, 1124 (2019).
- 350 6. Versporten, A. *et al.* Antimicrobial consumption and resistance in adult hospital  
351 inpatients in 53 countries: results of an internet-based global point prevalence survey.  
352 *Lancet Glob. Health* **6**, e619–e629 (2018).
- 353 7. Hsia, Y. *et al.* Use of the WHO Access, Watch, and Reserve classification to define  
354 patterns of hospital antibiotic use (AWaRe): an analysis of paediatric survey data from 56  
355 countries. *Lancet Glob. Health* **7**, e861–e871 (2019).
- 356 8. Overview | Antimicrobial stewardship: systems and processes for effective antimicrobial  
357 medicine use | Guidance | NICE. Available at: <https://www.nice.org.uk/guidance/ng15>.  
358 (Accessed: 25th July 2019)
- 359 9. Tornimbene, B. *et al.* WHO Global Antimicrobial Resistance Surveillance System early  
360 implementation 2016–17. *Lancet Infect. Dis.* **18**, 241–242 (2018).



- 361 10. UK 5-year action plan for antimicrobial resistance 2019 to 2024. *GOV.UK* Available at:  
362 <https://www.gov.uk/government/publications/uk-5-year-action-plan-for-antimicrobial->  
363 [resistance-2019-to-2024](https://www.gov.uk/government/publications/uk-5-year-action-plan-for-antimicrobial-resistance-2019-to-2024). (Accessed: 28th May 2019)
- 364 11. Tuméo, E. *et al.* Are antibiotic-resistant *Pseudomonas aeruginosa* isolated from  
365 hospitalised patients recovered in the hospital effluents? *Int. J. Hyg. Environ. Health* **211**,  
366 200–204 (2008).
- 367 12. Lozniewski *et al.* Comparison of sludge and clinical isolates of *Listeria monocytogenes*.  
368 *Lett. Appl. Microbiol.* **32**, 336–339 (2001).
- 369 13. Drieux, L., Haenn, S., Moulin, L. & Jarlier, V. Quantitative evaluation of extended-  
370 spectrum  $\beta$ -lactamase-producing *Escherichia coli* strains in the wastewater of a French  
371 teaching hospital and relation to patient strain. *Antimicrob. Resist. Infect. Control* **5**, 9  
372 (2016).
- 373 14. Talebi, M., Pourshafie, M. R., Katouli, M. & Möllby, R. Molecular Structure and  
374 Transferability of Tn1546-Like Elements in *Enterococcus faecium* Isolates from Clinical,  
375 Sewage, and Surface Water Samples in Iran. *Appl. Environ. Microbiol.* **74**, 1350–1356  
376 (2008).
- 377 15. Gouliouris, T. *et al.* Detection of vancomycin-resistant *Enterococcus faecium* hospital-  
378 adapted lineages in municipal wastewater treatment plants indicates widespread  
379 distribution and release into the environment. *Genome Res.* **29**, 626–634 (2019).
- 380 16. Ludden, C. *et al.* Sharing of carbapenemase-encoding plasmids between  
381 Enterobacteriaceae in UK sewage uncovered by MinION sequencing. *Microb. Genomics*  
382 **3**, (2017).
- 383 17. Yang, C. m. *et al.* Comparison of antimicrobial resistance patterns between clinical and  
384 sewage isolates in a regional hospital in Taiwan. *Lett. Appl. Microbiol.* **48**, 560–565  
385 (2009).

- 386 18. Maheshwari, M., Yaser, N. H., Naz, S., Fatima, M. & Ahmad, I. Emergence of  
387 ciprofloxacin-resistant extended-spectrum  $\beta$ -lactamase-producing enteric bacteria in  
388 hospital wastewater and clinical sources. *J. Glob. Antimicrob. Resist.* **5**, 22–25 (2016).
- 389 19. Santoro, D. O., Romão, C. M. C. A. & Clementino, M. M. Decreased aztreonam  
390 susceptibility among *Pseudomonas aeruginosa* isolates from hospital effluent treatment  
391 system and clinical samples. *Int. J. Environ. Health Res.* **22**, 560–570 (2012).
- 392 20. Berendsen, B. J. A., Wegh, R. S., Memelink, J., Zuidema, T. & Stolker, L. A. M. The  
393 analysis of animal faeces as a tool to monitor antibiotic usage. *Talanta* **132**, 258–268  
394 (2015).
- 395 21. Knudsen, B. E. *et al.* Impact of Sample Type and DNA Isolation Procedure on Genomic  
396 Inference of Microbiome Composition. *mSystems* **1**, (2016).
- 397 22. Wood, D. E. & Salzberg, S. L. Kraken: ultrafast metagenomic sequence classification  
398 using exact alignments. *Genome Biol.* **15**, R46 (2014).
- 399 23. Dabdoub, S. *Create BIOM-format tables (<http://biom-format.org>) from Kraken output*  
400 *(<http://ccb.jhu.edu/software/kraken/>, <https://github.com/DerrickWood/kraken>)*.:  
401 *smdabdoub/kraken-biom.* (2019).
- 402 24. Zankari, E. *et al.* Identification of acquired antimicrobial resistance genes. *J. Antimicrob.*  
403 *Chemother.* **67**, 2640–2644 (2012).
- 404 25. R: The R Project for Statistical Computing. Available at: <https://www.r-project.org/>.  
405 (Accessed: 20th June 2019)
- 406 26. Munk, P. *et al.* Abundance and diversity of the faecal resistome in slaughter pigs and  
407 broilers in nine European countries. *Nat. Microbiol.* **3**, 898 (2018).
- 408 27. Harrison, X. A. Using observation-level random effects to model overdispersion in count  
409 data in ecology and evolution. *PeerJ* **2**, (2014).

- 410 28. Buelow, E. *et al.* Limited influence of hospital wastewater on the microbiome and  
411 resistome of wastewater in a community sewerage system. *FEMS Microbiol. Ecol.* **94**,  
412 (2018).
- 413 29. Bürgmann, H. *et al.* Water and sanitation: an essential battlefield in the war on  
414 antimicrobial resistance. *FEMS Microbiol. Ecol.* **94**, (2018).
- 415 30. Sandegren, L. Selection of antibiotic resistance at very low antibiotic concentrations.  
416 *Ups. J. Med. Sci.* **119**, 103–107 (2014).
- 417 31. Cerqueira, G. C. *et al.* Multi-institute analysis of carbapenem resistance reveals  
418 remarkable diversity, unexplained mechanisms, and limited clonal outbreaks. *Proc. Natl.*  
419 *Acad. Sci. U. S. A.* **114**, 1135–1140 (2017).
- 420 32. Safdar, N. & Maki, D. G. The commonality of risk factors for nosocomial colonization  
421 and infection with antimicrobial-resistant *Staphylococcus aureus*, enterococcus, gram-  
422 negative bacilli, *Clostridium difficile*, and *Candida*. *Ann. Intern. Med.* **136**, 834–844  
423 (2002).
- 424 33. Gupta, N., Limbago, B. M., Patel, J. B. & Kallen, A. J. Carbapenem-Resistant  
425 Enterobacteriaceae: Epidemiology and Prevention. *Clin. Infect. Dis.* **53**, 60–67 (2011).
- 426 34. Founou, R. C., Founou, L. L. & Essack, S. Y. Extended spectrum beta-lactamase  
427 mediated resistance in carriage and clinical gram-negative ESKAPE bacteria: a  
428 comparative study between a district and tertiary hospital in South Africa. *Antimicrob.*  
429 *Resist. Infect. Control* **7**, 134 (2018).
- 430 35. Ny, P., Nieberg, P. & Wong-Beringer, A. Impact of carbapenem resistance on  
431 epidemiology and outcomes of nonbacteremic *Klebsiella pneumoniae* infections. *Am. J.*  
432 *Infect. Control* **43**, 1076–1080 (2015).
- 433 36. Sommer, M. O. A., Dantas, G. & Church, G. M. Functional characterization of the  
434 antibiotic resistance reservoir in the human microflora. *Science* **325**, 1128–1131 (2009).

- 435 37. Pärnänen, K. M. M. *et al.* Antibiotic resistance in European wastewater treatment plants  
436 mirrors the pattern of clinical antibiotic resistance prevalence. *Sci. Adv.* **5**, (2019).
- 437 38. Mladenovic-Antic, S. *et al.* Correlation between antimicrobial consumption and  
438 antimicrobial resistance of *Pseudomonas aeruginosa* in a hospital setting: a 10-year study.  
439 *J. Clin. Pharm. Ther.* **41**, 532–537 (2016).
- 440 39. Rogues, A. M. *et al.* Relationship Between Rates of Antimicrobial Consumption and the  
441 Incidence of Antimicrobial Resistance in *Staphylococcus aureus* and *Pseudomonas*  
442 *aeruginosa* Isolates From 47 French Hospitals. *Infect. Control Hosp. Epidemiol.* **28**,  
443 1389–1395 (2007).
- 444 40. Pehrsson, E. C. *et al.* Interconnected microbiomes and resistomes in low-income human  
445 habitats. *Nature* **533**, 212–216 (2016).
- 446 41. Lamba, M. *et al.* Carbapenem resistance exposures via wastewaters across New Delhi.  
447 *Environ. Int.* **119**, 302–308 (2018).
- 448 42. Wellington, E. M. *et al.* The role of the natural environment in the emergence of  
449 antibiotic resistance in Gram-negative bacteria. *Lancet Infect. Dis.* **13**, 155–165 (2013).
- 450
- 451
- 452

| <b>Collection Point (CP)</b> | <b>Specialties</b>                                                       | <b>No. of wards</b> | <b>No. of pts</b> | <b>Average length of stay in days (s.d.)</b> | <b>Average age in years (s.d.)</b> | <b>DDD per 100 OBD</b> | <b>No. of clinical isolates</b> |
|------------------------------|--------------------------------------------------------------------------|---------------------|-------------------|----------------------------------------------|------------------------------------|------------------------|---------------------------------|
| <b>CP1</b>                   | Cardiology, Urology                                                      | 3                   | 46                | 4.9 (0.8)                                    | 62.6 (2.2)                         | 123.7                  | 19                              |
| <b>CP3</b>                   | Oncology, Haematology                                                    | 7                   | 67                | 3.7 (2.7)                                    | 62.1 (1.0)                         | 200.5                  | 27                              |
| <b>CP4</b>                   | Acute receiving unit                                                     | 5                   | 35                | 0.9 (0.7)                                    | 70.5 (2.3)                         | 325.8                  | 45                              |
| <b>CP5</b>                   | Neuroscience                                                             | 3                   | 59                | 3.3 (1.1)                                    | 53.5 (2.1)                         | 73.5                   | 8                               |
| <b>CP6</b>                   | Intensive care, Surgery, Medicine                                        | 3                   | 70                | 7.6 (2.5)                                    | 66.6 (1.7)                         | 113.8                  | 17                              |
| <b>CP7</b>                   | Infectious Diseases, Surgery, Medicine                                   | 6                   | 105               | 6.1 (3.2)                                    | 63.5 (0.8)                         | 148.1                  | 20                              |
| <b>CP8</b>                   | Respiratory, Medicine for the Elderly, Urology, Surgical High Dependency | 6                   | 133               | 12.8 (9.0)                                   | 69.0 (1.0)                         | 116.4                  | 25                              |

453 **Table 1 Demographics of hospital collection points**

454 Standard deviation only represents standard deviation of the average age and length of stay per  
 455 week. Antimicrobial usage does not include antibiotics issued for outpatient prescriptions or in  
 456 theatres.

457 DDD defined daily dose, OBD occupied bed day, s.d. standard deviation

458

459

460

461

462

463 **Figure legends**

464 **Figure 1. Hospital wastewater and community sewage resistome and microbiome**  
465 **abundance composition.**

466 A) Principal coordinate analyses of resistome based on Bray-Curtis dissimilarity. The  
467 percentage of variation explained is noted on the axis labels. B) Principal coordinate analyses  
468 for the microbiome. C) Relative abundance of AMR genes by antimicrobial class. D) Relative  
469 abundance of the 19 most abundant bacterial genera in the wastewater and sewage microbiome.  
470 Abbreviations: CP=collection point within hospital, Seafield=community sewage works,  
471 TB=tuberculosis.

472 **Figure 2 Heat map of 50 most abundant antimicrobial resistance genes.**

473 Relative abundance of AMR genes (FPKM) were log transformed and both AMR genes and  
474 collection points were clustered using complete-linkage clustering. For AMR genes clustering  
475 was based on Pearson correlation coefficients, for collection points clustering was based on the  
476 BC-dissimilarity matrix (Figure 1) which uses all genes.

477 **Figure 3. Generalised linear mixed effects model for the relationship between hospital**  
478 **department characteristics and antimicrobial resistance gene abundance.**

479 Effect of antimicrobial usage (AMU) measured in defined daily dose per 100 occupied bed  
480 days (DDD/100 OBDs) on AMR gene abundance, controlling for cross –resistance by  
481 including total AMU per collection point, average age and average length of stay (LOS),  
482 including an interaction effect between AMU and LOS.

483 \*=  $p < 0.05$ , LOS = length of stay, AB = antibiotics, CP = collection point.

484

485

486

487

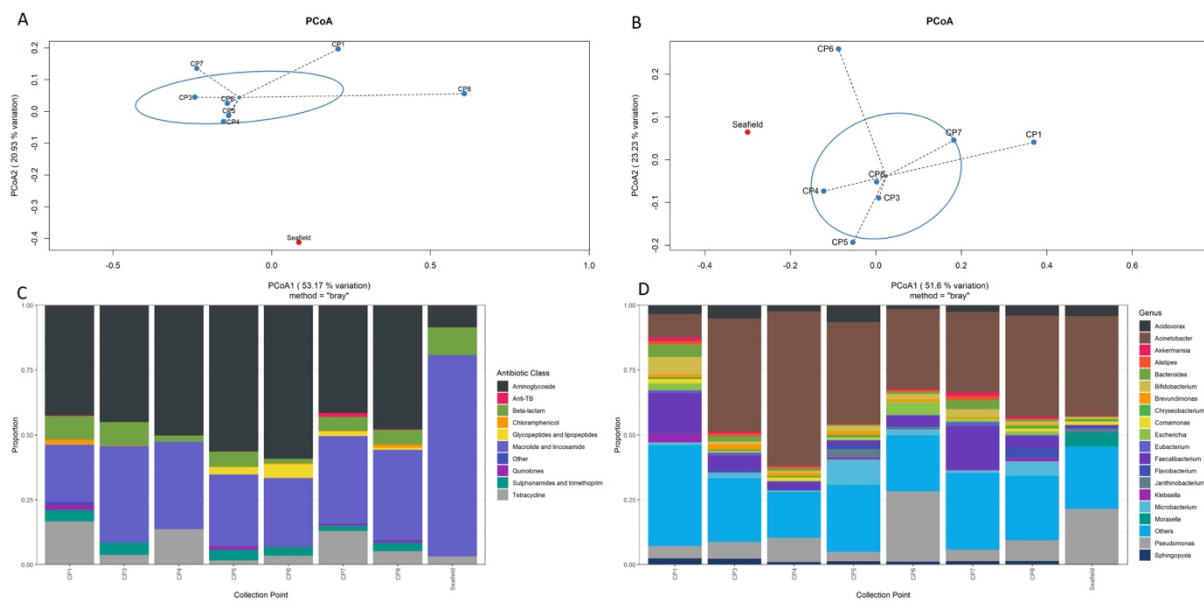

488

489 Figure 1

490

491

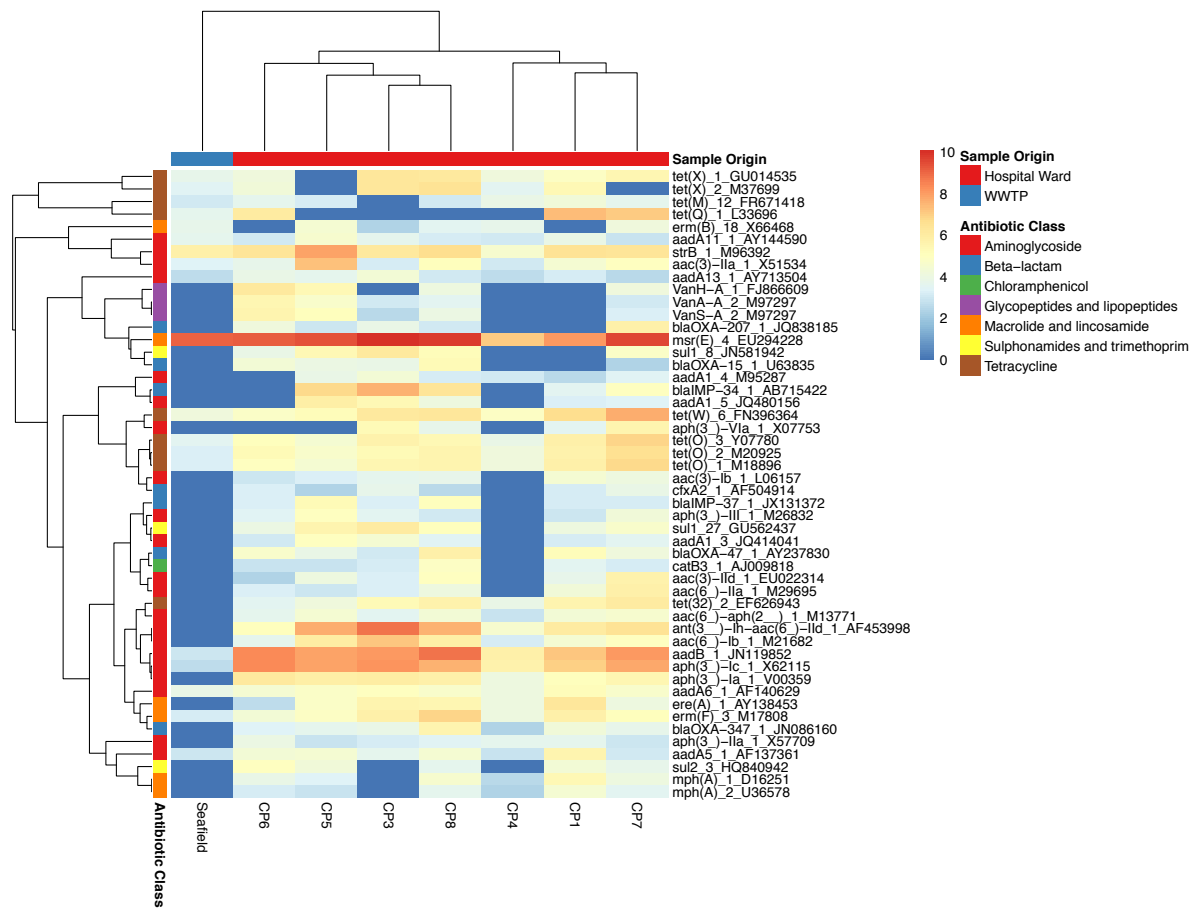

492

493 Figure 2

494

495



496

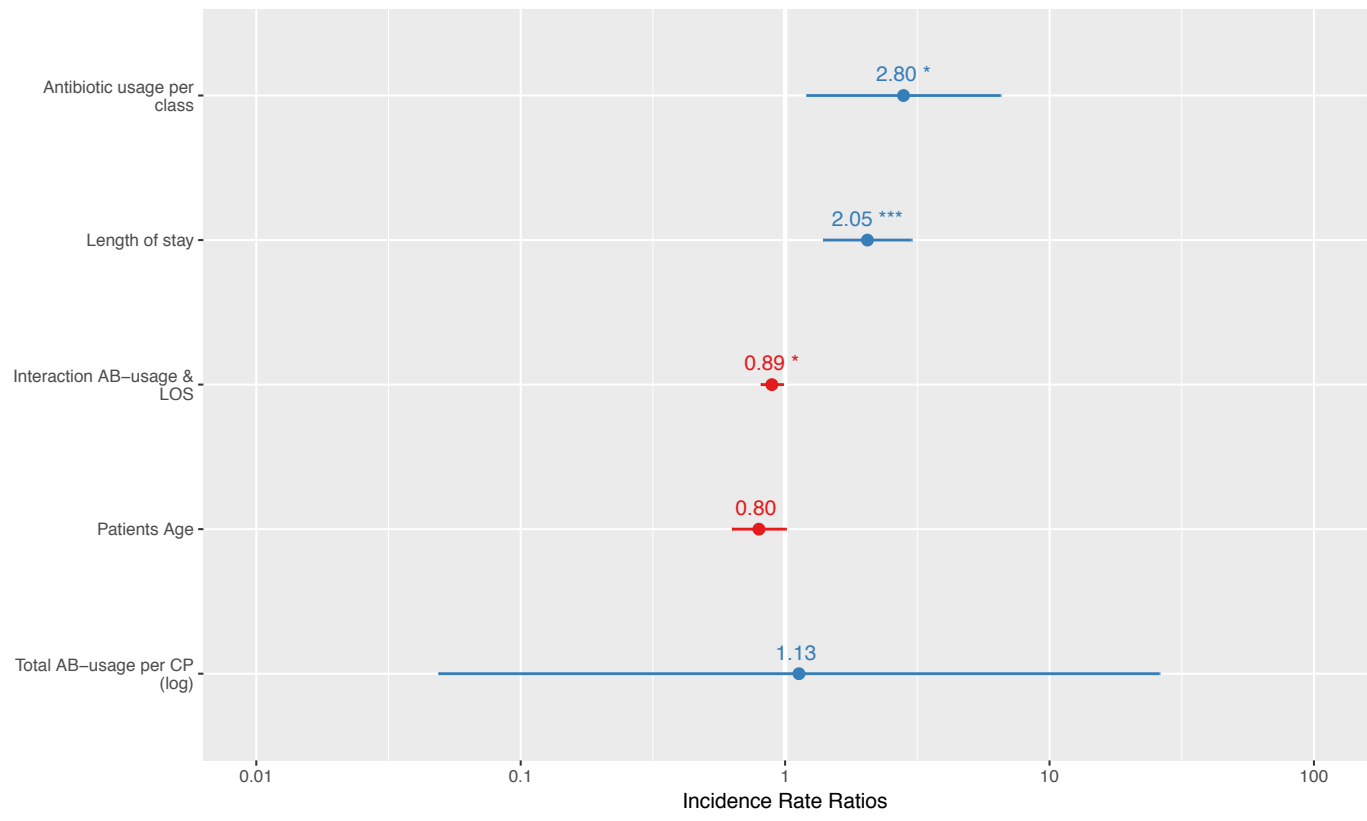

497

498 **Figure 3**

499

500

501

502
