# Supplementary material for: Secrets of the hospital underbelly: patterns of abundance of antimicrobial resistance genes in hospital wastewater vary by specific antimicrobial and bacterial family
Source: bioRxiv or medRxiv preprint supplement (doi:10.1101/19006858), 2021-05-06
Supplement: Supplementary file [file 19006858-1.pdf]

## Supplementary Figures

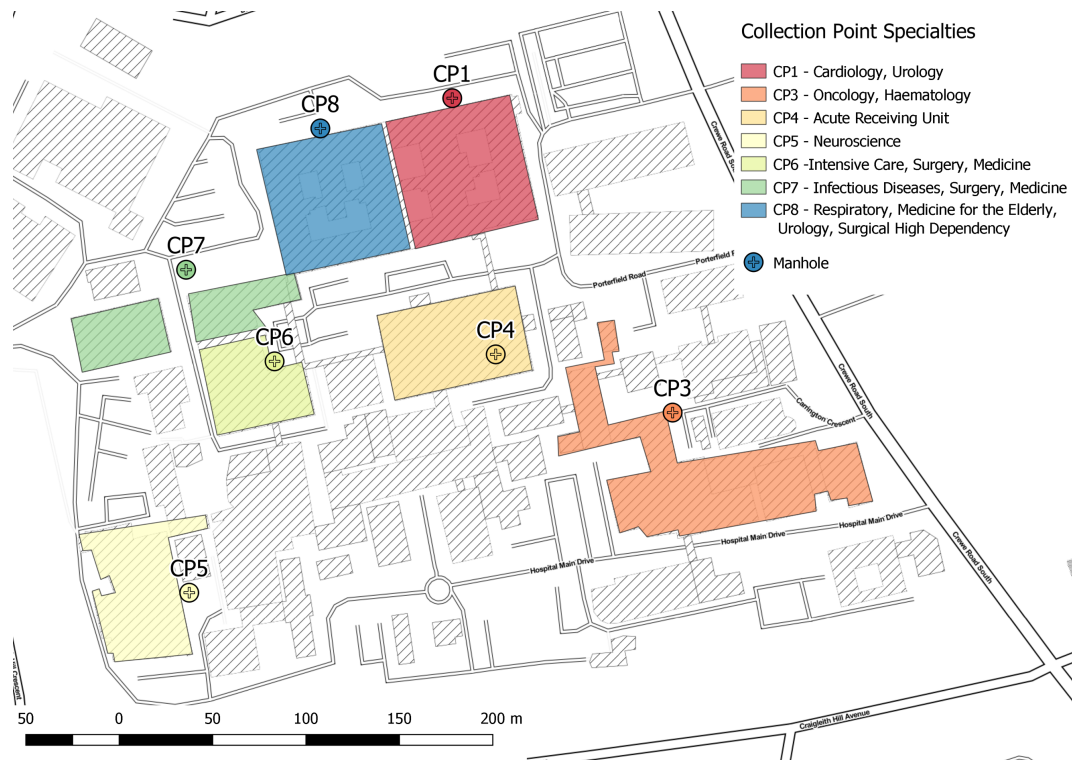

**Supplementary Figure 1** Schemata of location of analysed wastewater Collection Points (CP) on tertiary hospital site. Hospital wastewater was sampled from indicated locations, which are the main clinical areas of the hospital site, over a 24-hour period using composite samplers. Shaded areas represent the drainage of the sampled manholes. CP4 was a manhole located underneath the hospital in a plant room.

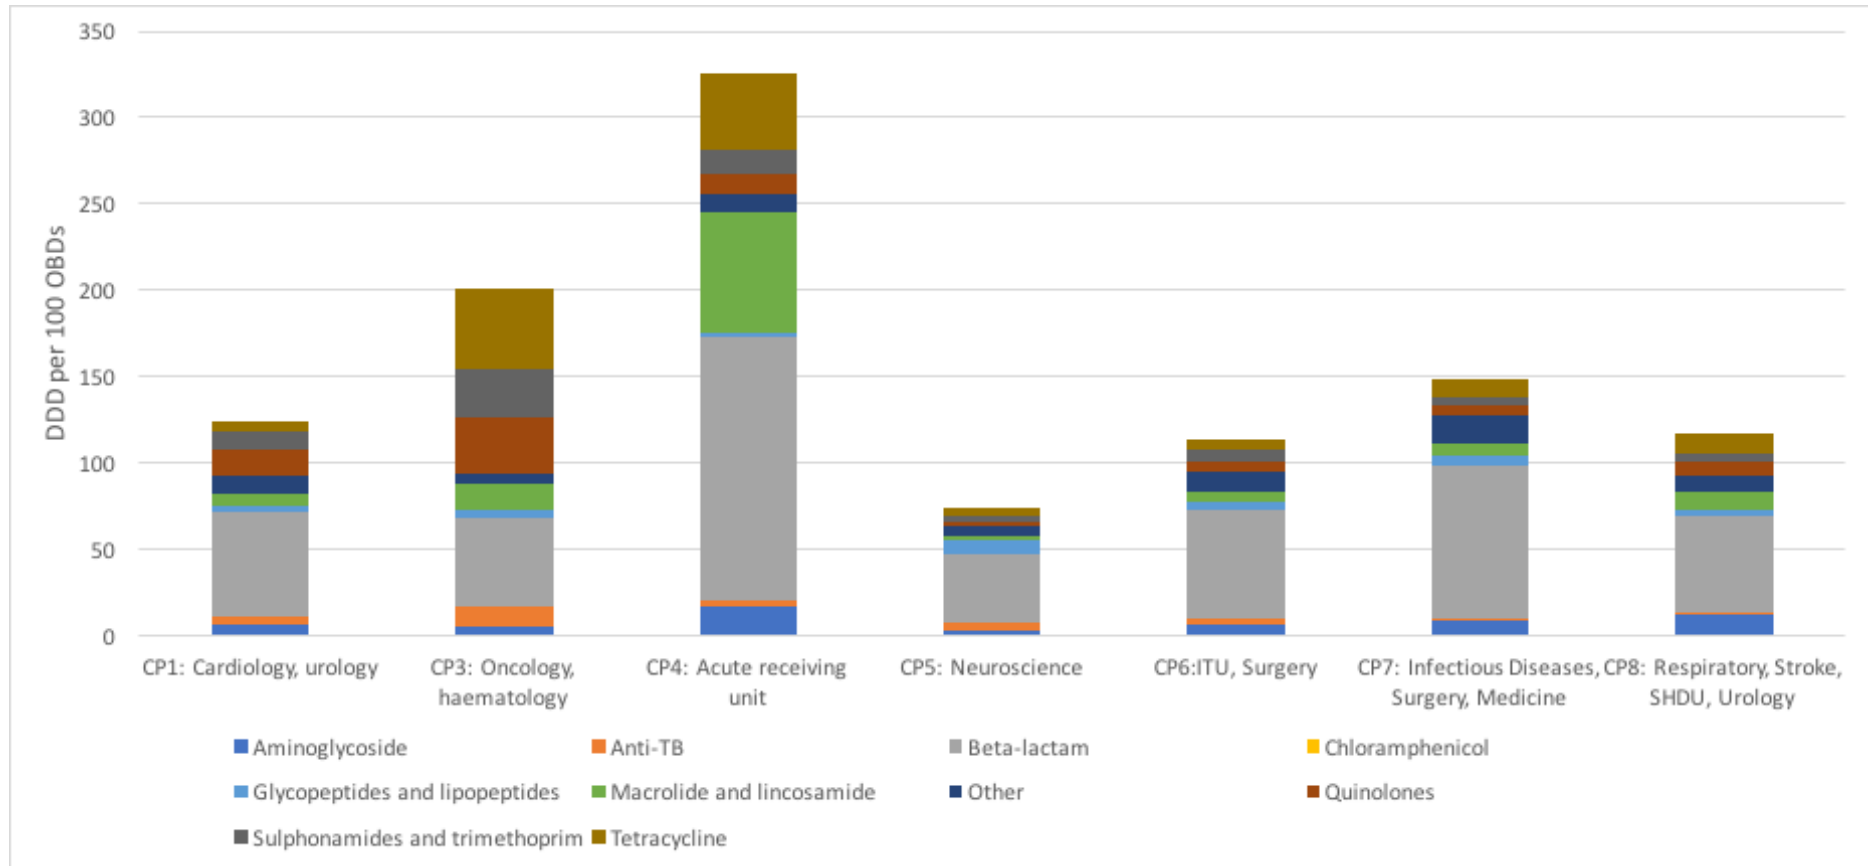

**Supplementary Figure 2** Antimicrobial consumption by class over different hospital departments

Pharmacy issues to the wards within the collection points were collated over a three-month period and defined daily dose (DDD) per 100 occupied bed days (OBD) calculated to represent the antimicrobial consumption at each collection point.

DDD= defined daily dose, OBD = occupied bed day, ITU=intensive care unit, SHDU = surgical high dependency unit.

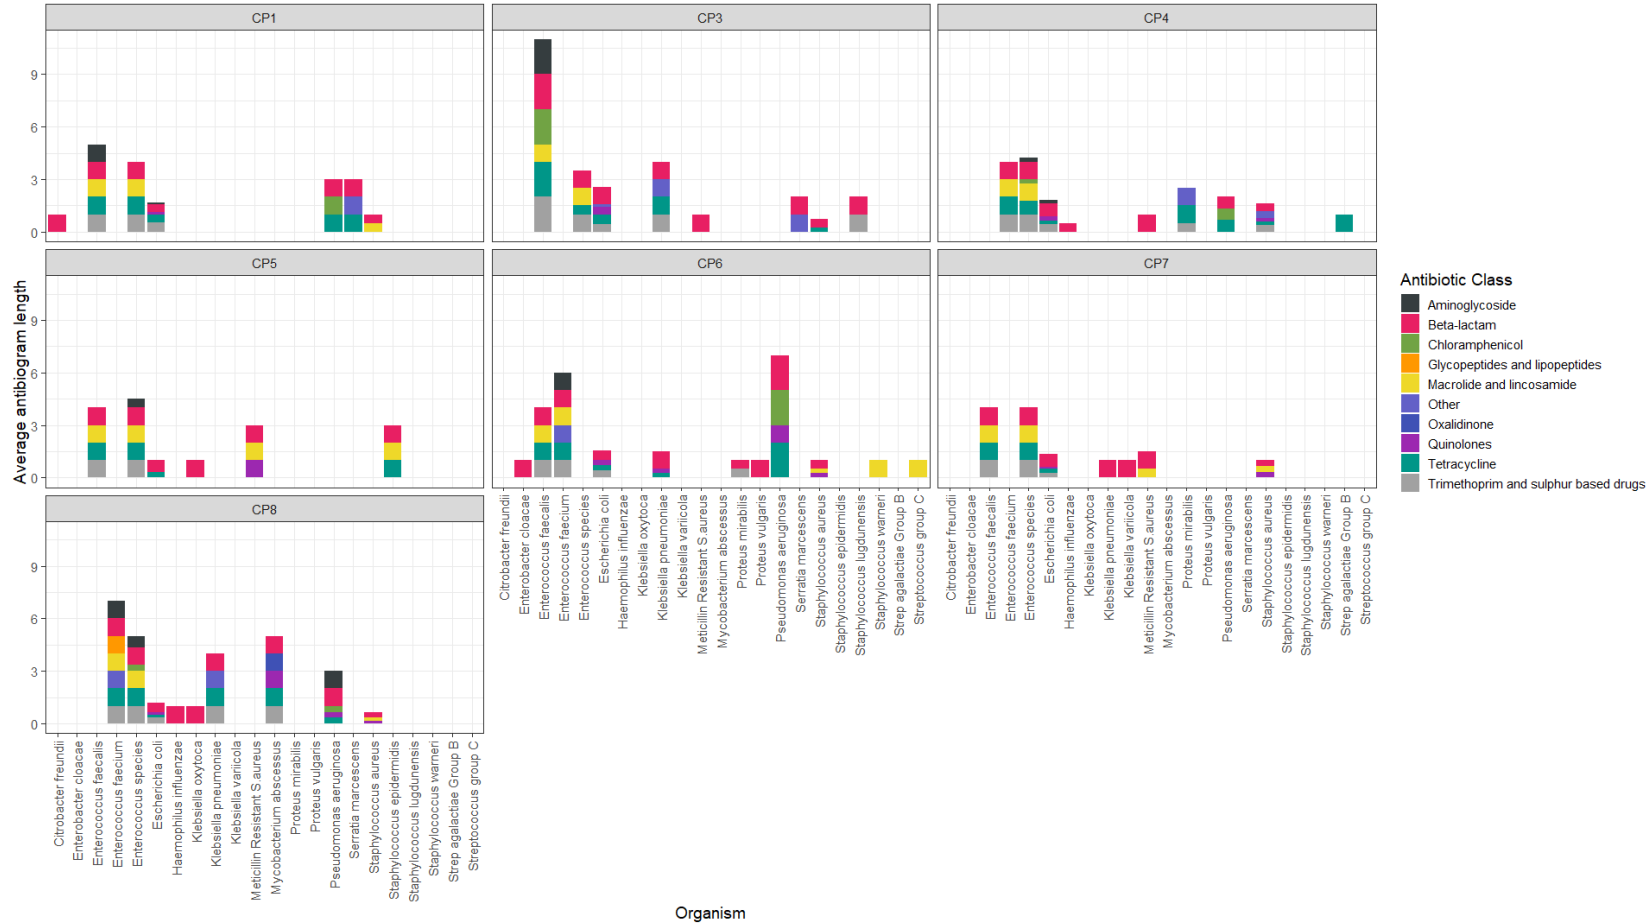

**Supplementary Figure 3** Phenotypic resistance in clinical isolates by antimicrobial class represented by average antibiogram length per organism at each collection point

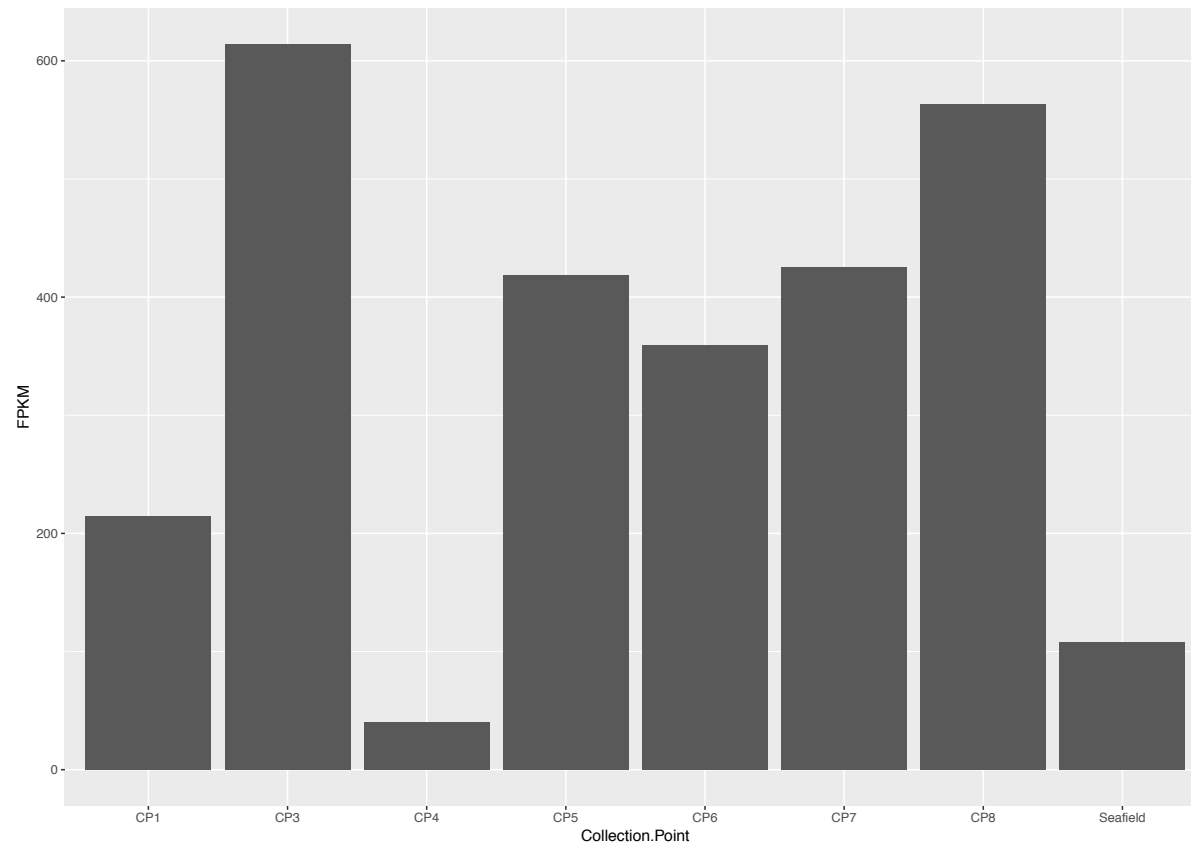

**Supplementary Figure 4** Total AMR gene abundance in FPKM

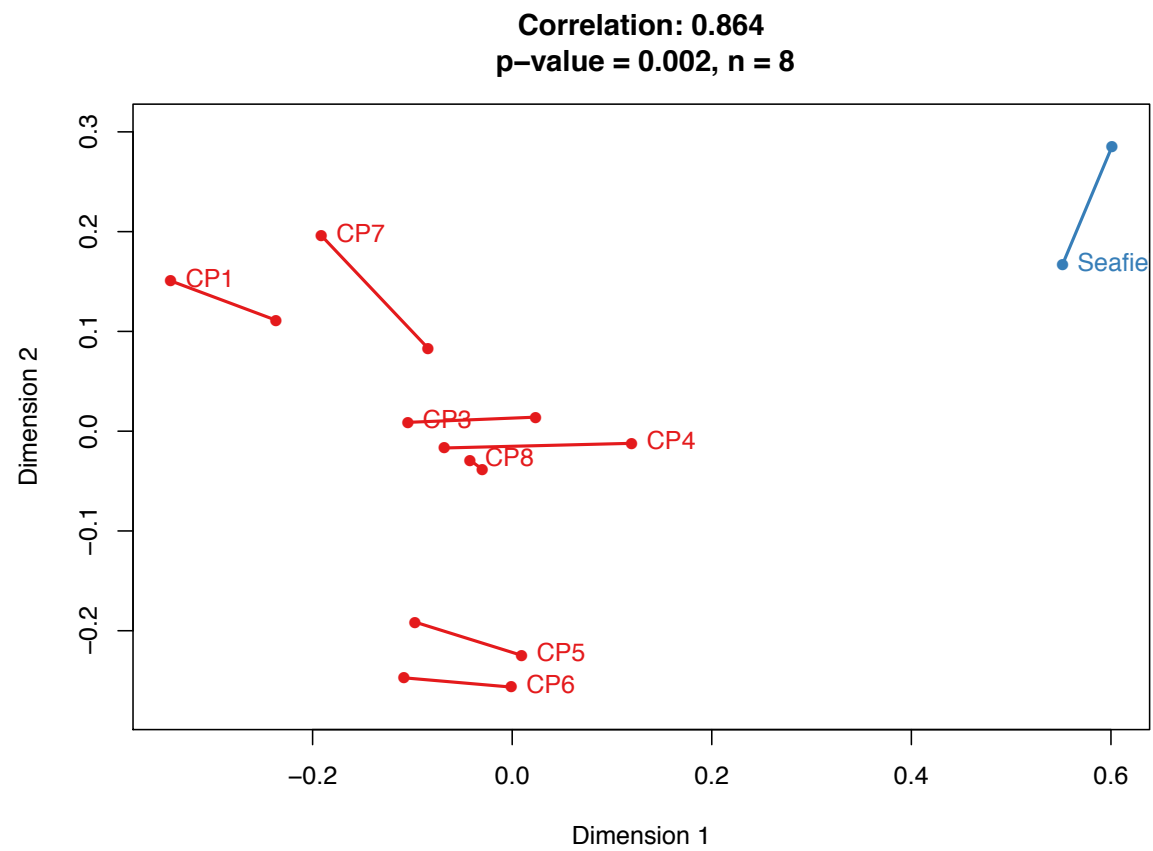

**Supplementary Figure 5** Procrustes analysis on ordinations of AMR genes and bacterial composition

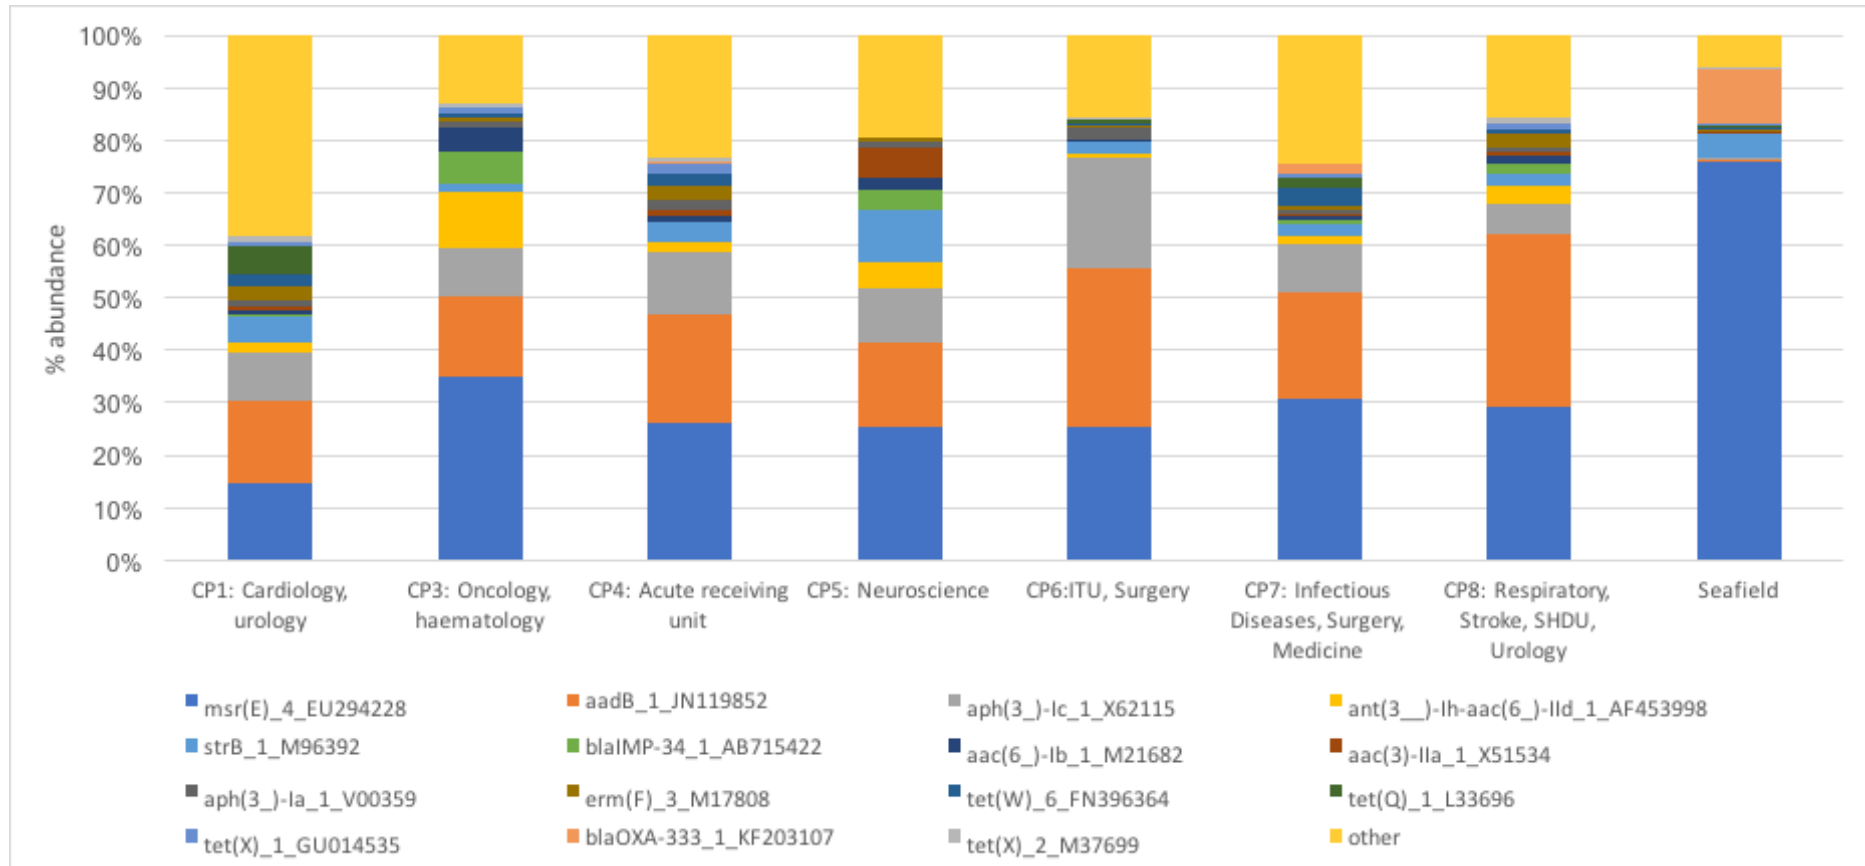

**Supplementary Figure 6** Fifteen most common AMR genes relative to total abundance within samples

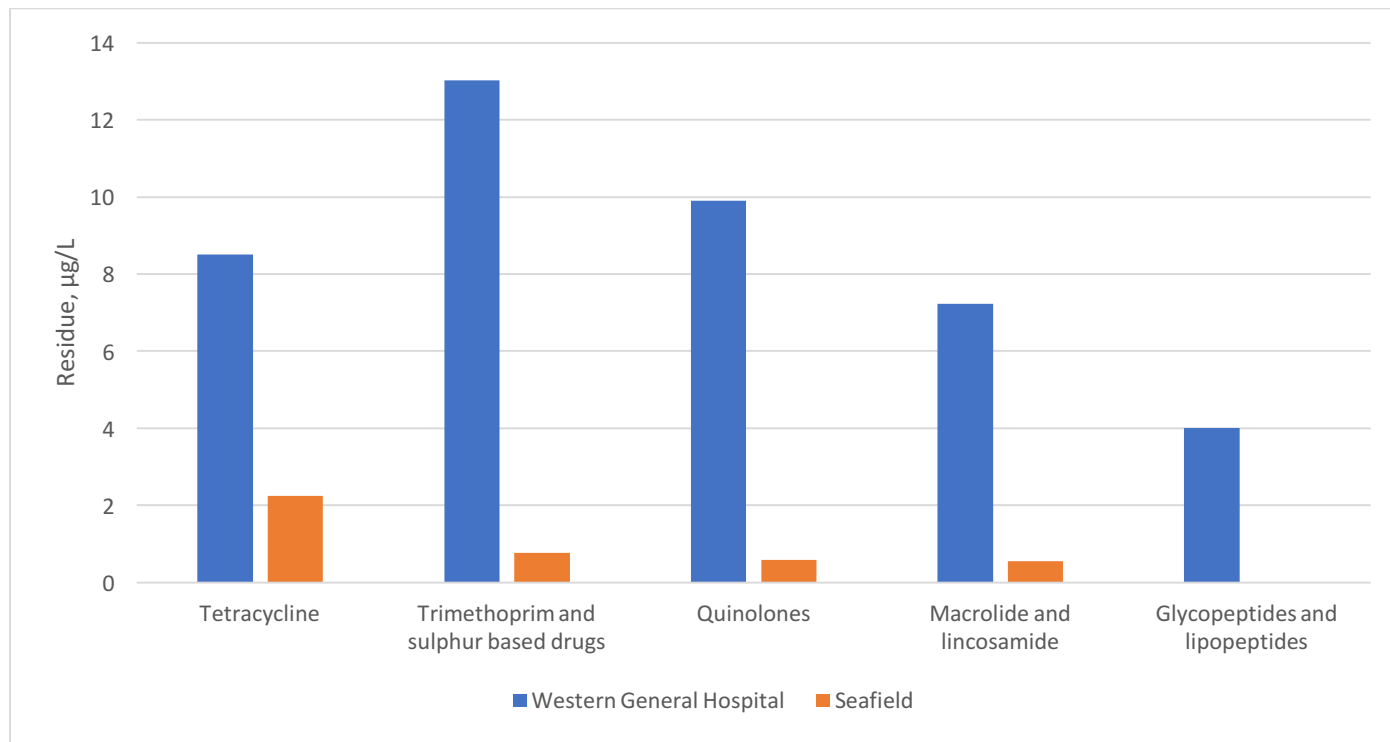

**Supplementary Figure 7** Antibiotic residues from composite hospital wastewater sample and urban sewage as measured by LC-MS/MS

## Supplementary tables

| Name            | All read pairs | Non-human read pairs |      | Bacterial read pairs |     | Viral read pairs |       | Unclassified read pairs |     | AMR gene read pairs |       |
|-----------------|----------------|----------------------|------|----------------------|-----|------------------|-------|-------------------------|-----|---------------------|-------|
|                 |                |                      |      |                      |     |                  |       |                         |     |                     |       |
| <b>CP1</b>      | 38936133       | 37197751             | 96%  | 24881608             | 67% | 290110           | 0.78% | 12026033                | 32% | 18653               | 0.05% |
| <b>CP3</b>      | 39020950       | 37263424             | 95%  | 27045455             | 73% | 27924            | 0.07% | 10190045                | 27% | 50260               | 0.13% |
| <b>CP4</b>      | 38917796       | 38765366             | 100% | 30882916             | 80% | 12683            | 0.03% | 7869767                 | 20% | 4811                | 0.01% |
| <b>CP5</b>      | 39134218       | 38416823             | 98%  | 30394336             | 79% | 25403            | 0.07% | 7997084                 | 21% | 39324               | 0.10% |
| <b>CP6</b>      | 38570082       | 28477657             | 74%  | 23075108             | 81% | 70208            | 0.25% | 5332341                 | 19% | 23535               | 0.08% |
| <b>CP7</b>      | 39245486       | 37945786             | 97%  | 27022991             | 71% | 114619           | 0.30% | 10808176                | 28% | 36431               | 0.10% |
| <b>CP8</b>      | 35793379       | 35257817             | 99%  | 26231254             | 74% | 112101           | 0.32% | 8914462                 | 25% | 40968               | 0.12% |
| <b>Seafield</b> | 38347503       | 38259522             | 100% | 30383525             | 79% | 27149            | 0.07% | 7848848                 | 21% | 11894               | 0.03% |

### Supplementary Table 1 Total read pairs, read pairs assigned to major taxonomic groups and antimicrobial resistance gene read pairs

Percentages of bacterial, viral, unclassified and AMR gene read pairs are calculated from the total non-human reads per collection point.

### Supplementary Table 2 Bacterial genera at each collection point

Please see separate excel file

### Supplementary Table 3 AMR genes at each collection point

Please see separate excel file



| <i>Coefficients</i>                                  | <i>Odds Ratios</i> | <i>Conf. Int (95%)</i> | <i>P-Value</i>   |
|------------------------------------------------------|--------------------|------------------------|------------------|
| Intercept                                            | 0.04               | 0.01 – 0.23            | <b>&lt;0.001</b> |
| FPKM (log, urine/faecal samples)                     | 1.15               | 0.92 – 1.44            | 0.224            |
| FPKM (log, non-urine/faecal samples)                 | 0.86               | 0.67 – 1.11            | 0.249            |
| Isolate Type = Urine                                 | 1.40               | 0.64 – 3.06            | 0.396            |
| <b>Random Effects</b>                                |                    |                        |                  |
| $\sigma^2$                                           | 5.22               |                        |                  |
| $\tau_{00}$ obs                                      | 1.93               |                        |                  |
| $\tau_{00}$ Organism                                 | 3.39               |                        |                  |
| $\tau_{00}$ ABClass                                  | 4.06               |                        |                  |
| $\tau_{00}$ Site                                     | 0.02               |                        |                  |
| ICC                                                  | 0.59               |                        |                  |
| N <sub>Organism</sub>                                | 31                 |                        |                  |
| N <sub>Site</sub>                                    | 7                  |                        |                  |
| N <sub>ABClass</sub>                                 | 10                 |                        |                  |
| N <sub>obs</sub>                                     | 1124               |                        |                  |
| Observations                                         | 1124               |                        |                  |
| Marginal R <sup>2</sup> / Conditional R <sup>2</sup> | 0.021 / 0.598      |                        |                  |

**Supplementary Table 4 Output from model examining the relationship between resistance in clinical isolates and AMR gene abundance in hospital wastewater**

| <b>Clinical Isolate Model</b>                        |                    |                        |                  |
|------------------------------------------------------|--------------------|------------------------|------------------|
| <i>Coefficients</i>                                  | <i>Odds Ratios</i> | <i>Conf. Int (95%)</i> | <i>P-Value</i>   |
| Intercept                                            | 0.02               | 0.00 – 0.11            | <b>&lt;0.001</b> |
| AMU (log, urine/faecal samples)                      | 0.92               | 0.64 – 1.31            | 0.629            |
| AMU (log, non-urine/faecal samples)                  | 1.27               | 0.85 – 1.89            | 0.245            |
| Isolate Type = Urine                                 | 8.05               | 2.69 – 24.15           | <b>&lt;0.001</b> |
| <b>Random Effects</b>                                |                    |                        |                  |
| $\sigma^2$                                           | 3.29               |                        |                  |
| $\tau_{00}$ obs                                      | 1.82               |                        |                  |
| $\tau_{00}$ Organism                                 | 3.40               |                        |                  |
| $\tau_{00}$ ABClass                                  | 4.04               |                        |                  |
| $\tau_{00}$ Site                                     | 0.01               |                        |                  |
| ICC obs                                              | 0.14               |                        |                  |
| ICC Organism                                         | 0.27               |                        |                  |
| ICC ABClass                                          | 0.32               |                        |                  |
| ICC Site                                             | 0.00               |                        |                  |
| Observations                                         | 1124               |                        |                  |
| Marginal R <sup>2</sup> / Conditional R <sup>2</sup> | 0.034 / 0.607      |                        |                  |

**Supplementary Table 5 Output from model examining the relationship between resistance in clinical isolates and antimicrobial usage (AMU)**
