# Supplementary material for: Secrets of the hospital underbelly: patterns of abundance of antimicrobial resistance genes in hospital wastewater vary by specific antimicrobial and bacterial family
Source: bioRxiv or medRxiv preprint supplement (doi:10.1101/19006858), 2021-05-06
Supplement: Supplementary file [file media-1.pdf]

**Supplementary tables**

| <b>Name</b> | <b>All read pairs</b> | <b>Non-human read pairs</b> | <b>% of total reads</b> | <b>Bacterial read pairs</b> | <b>% of non-human reads</b> | <b>Viral read pairs</b> | <b>% of non-human reads</b> | <b>Unclassified read pairs</b> | <b>% of non-human reads</b> | <b>AMR gene read pairs</b> | <b>% of non-human reads</b> |
|-------------|-----------------------|-----------------------------|-------------------------|-----------------------------|-----------------------------|-------------------------|-----------------------------|--------------------------------|-----------------------------|----------------------------|-----------------------------|
| CP1         | 38869360              | 37007788                    | 95                      | 20284420                    | 52                          | 36350                   | 0.09                        | 19414692                       | 50                          | 57318                      | 0.15                        |
| CP3         | 38950823              | 37111066                    | 95                      | 23077786                    | 59                          | 7052                    | 0.02                        | 15802719                       | 41                          | 153806                     | 0.39                        |
| CP4         | 38854316              | 38656944                    | 99                      | 27184108                    | 70                          | 2945                    | 0.01                        | 12865522                       | 33                          | 27632                      | 0.07                        |
| CP5         | 39062827              | 38294655                    | 98                      | 27458178                    | 70                          | 8784                    | 0.02                        | 12632702                       | 32                          | 123020                     | 0.31                        |
| CP6         | 38503994              | 28249480                    | 73                      | 21423749                    | 56                          | 30321                   | 0.08                        | 8045607                        | 21                          | 73101                      | 0.19                        |
| CP7         | 39176215              | 37801241                    | 96                      | 21622738                    | 55                          | 5525                    | 0.01                        | 18844242                       | 48                          | 102444                     | 0.26                        |
| CP8         | 35716605              | 35093020                    | 98                      | 22709754                    | 64                          | 6201                    | 0.02                        | 14292670                       | 40                          | 132598                     | 0.37                        |
| Seafield    | 38298451              | 38143462                    | 100                     | 28016716                    | 73                          | 3594                    | 0.01                        | 11196189                       | 29                          | 40977                      | 0.11                        |

**Table S1. Total read pairs, read pairs assigned to major taxonomic groups and antimicrobial resistance gene read pairs.**

**Table S2 Bacterial genera at each collection point**

Please see separate excel file

**Table S3 AMR genes at each collection point (FPKM)**

Please see separate excel file

| <b>Clinical Isolate Model</b>                        |                    |                         |                  |
|------------------------------------------------------|--------------------|-------------------------|------------------|
| <i>Coefficients</i>                                  | <i>Odds Ratios</i> | <i>Conf. Int. (95%)</i> | <i>P-Value</i>   |
| Intercept                                            | 0.02               | 0.00 – 0.11             | <b>&lt;0.001</b> |
| AMU (log, urine/faecal samples)                      | 0.92               | 0.64 – 1.31             | 0.629            |
| AMU (log, non-urine/faecal samples)                  | 1.27               | 0.85 – 1.89             | 0.245            |
| Isolate Type = Urine                                 | 8.05               | 2.69 – 24.15            | <b>&lt;0.001</b> |
| <b>Random Effects</b>                                |                    |                         |                  |
| $\sigma^2$                                           | 3.29               |                         |                  |
| $\tau_{00}$ Observation                              | 1.82               |                         |                  |
| $\tau_{00}$ Organism                                 | 3.40               |                         |                  |
| $\tau_{00}$ Antibiotic Class                         | 4.04               |                         |                  |
| $\tau_{00}$ Site                                     | 0.01               |                         |                  |
| ICC Observation                                      | 0.14               |                         |                  |
| ICC Organism                                         | 0.27               |                         |                  |
| ICC Antibiotic Class                                 | 0.32               |                         |                  |
| ICC Site                                             | 0.00               |                         |                  |
| Observations                                         | 1124               |                         |                  |
| Marginal R <sup>2</sup> / Conditional R <sup>2</sup> | 0.034 / 0.607      |                         |                  |

**Table S4. Output from model examining the relationship between resistance in clinical isolates and antimicrobial usage (AMU)**

| Data subset | Number of gene cluster groups | Number of observations | Fixed effects                 |                      |         | Random effects              |                         |                      |
|-------------|-------------------------------|------------------------|-------------------------------|----------------------|---------|-----------------------------|-------------------------|----------------------|
|             |                               |                        | Variable                      | IRR (CI)             | P value | $\tau_{\text{Observation}}$ | $\tau_{\text{Cluster}}$ | $\tau_{\text{Site}}$ |
| All data    | 106                           | 584                    | Log of total DDDs             | 0.87 (0.43 - 1.73)   | 0.64    | 1.21                        | 2.61                    | 0.13                 |
|             |                               |                        | Log of phenotype-matched DDDs | 1.11, (1.06 - 1.16)  | <0.001  |                             |                         |                      |
|             |                               |                        | Average length of stay        | 1.06 (0.97 - 1.17)   | 0.11    |                             |                         |                      |
| Carbapenems | 12                            | 56                     | Log of phenotype-matched DDDs | 1.91 (1.01 – 3.72)   | 0.07+   | 2.01                        | 2.51                    | 0.13                 |
| Vancomycin  | 3                             | 11                     | Log of phenotype-matched DDDs | 10.25 (2.32 – 49.10) | <0.001+ | -                           | 0.46                    | 1.88                 |
| Amoxicillin | 42                            | 172                    | Log of phenotype-matched DDDs | 0.68 (0.29 – 1.55)   | 0.84+   | 1.51                        | 2.42                    | 0.12                 |

**Table S5. Data summary and output from models examining the relationship between antimicrobial usage (AMU) and antimicrobial resistance gene abundance in waste water. Each row represents a separate model. Abbreviations: DDDs=daily defined doses, CI=confidence interval. † P values Bonferroni corrected**

| Data subset               | Number of bacterial species | Number of observations | Fixed effects                            |                    |         | Random effects              |                       |                          |
|---------------------------|-----------------------------|------------------------|------------------------------------------|--------------------|---------|-----------------------------|-----------------------|--------------------------|
|                           |                             |                        | Variable                                 | Odds Ratios (CI)   | P value | $\tau_{\text{Observation}}$ | $\tau_{\text{Class}}$ | $\tau_{\text{Organism}}$ |
| All data                  | 28                          | 2595                   | Urine or faecal samples:                 | 1.13 (0.90 – 1.42) | 0.281   | 1.84                        | 3.87                  | 3.54                     |
|                           |                             |                        | Log sewage FPKM                          | 0.88 (0.69 – 1.12) | 0.293   |                             |                       |                          |
|                           |                             |                        | Other sample sources: log of sewage FPKM |                    |         |                             |                       |                          |
| <i>Enterococcaceae</i>    | 3                           | 201                    | Log sewage FPKM                          | 1.62 (1.33 – 2.00) | <0.001† | -                           | -                     | -                        |
| <i>Staphylococcaceae</i>  | 5                           | 224                    | Log sewage FPKM                          | 1.65 (1.21 – 2.30) | 0.006 † | -                           | -                     | -                        |
| <i>Enterobacteriaceae</i> | 9                           | 395                    | Log sewage FPKM                          | 0.92 (0.79 – 1.01) | 0.92 †  | -                           | -                     | -                        |

**Table S6. Summary of data and output of models examining the relationship between clinical isolates and ARG abundance in waste water. ORs are for the log FPKM of ARGs matched to the antimicrobial class of the resistance test of the isolate. The three bacterial families were modelled separately. † P values Bonferroni corrected**

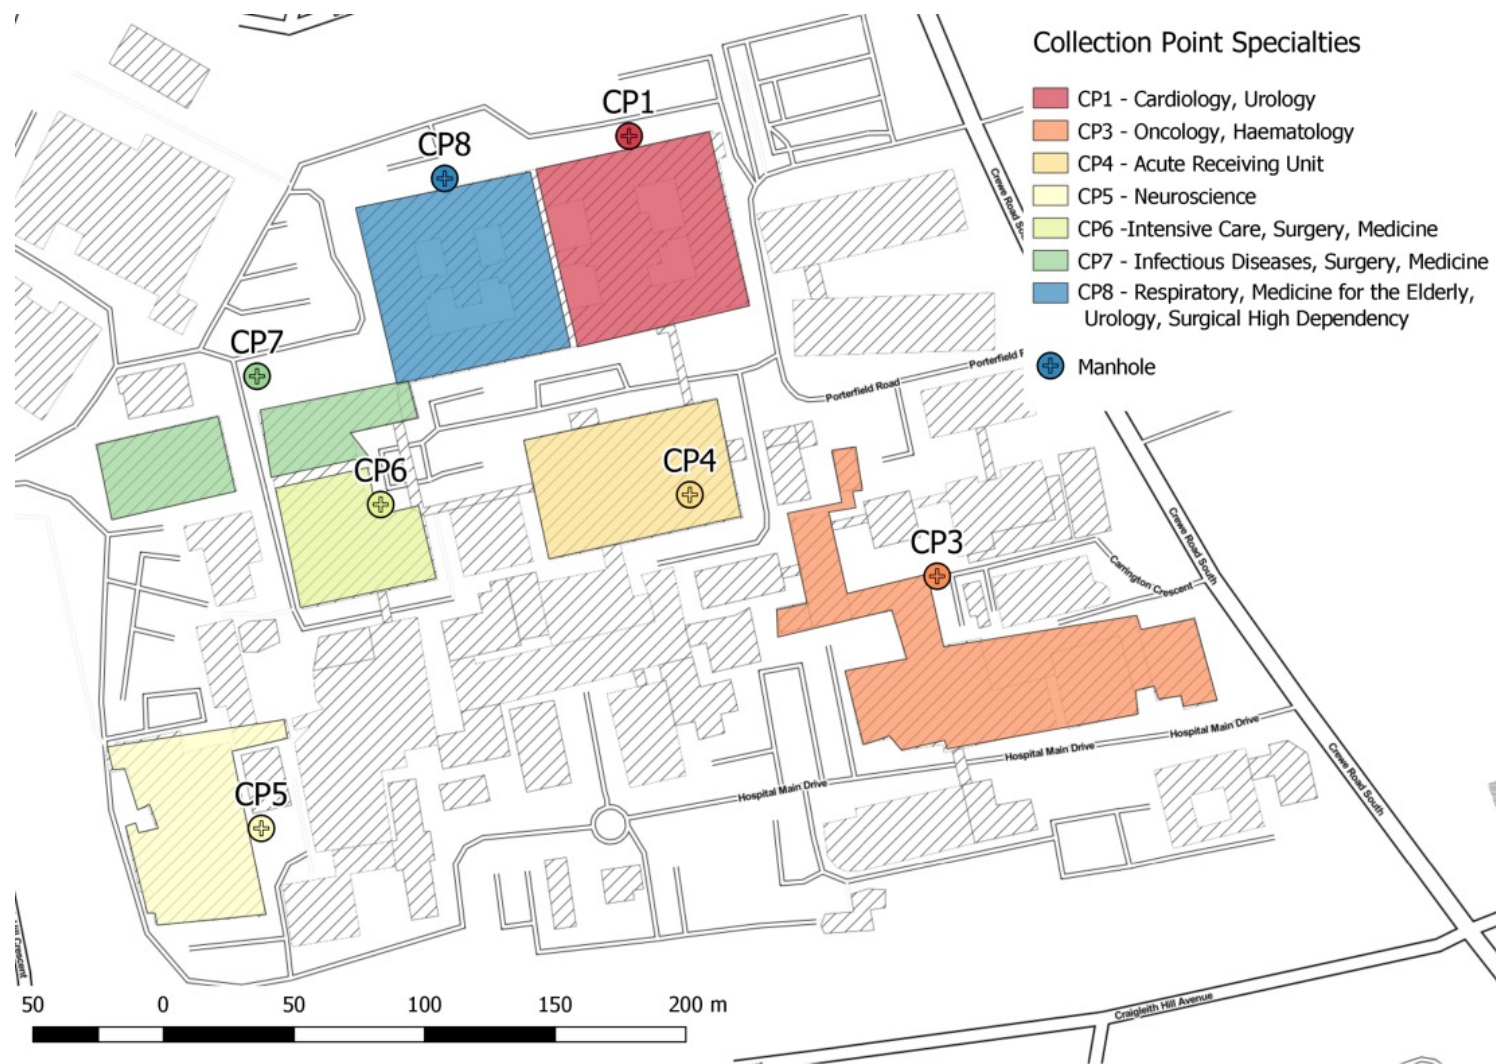

**Supplementary Figure 1** Schemata of location of analysed wastewater Collection Points (CP) on tertiary hospital site. Hospital wastewater was sampled from indicated locations, which are the main clinical areas of the hospital site, over a 24-hour period using composite samplers. Shaded areas represent the drainage of the sampled manholes. CP4 was a manhole located underneath the hospital in a plant room.

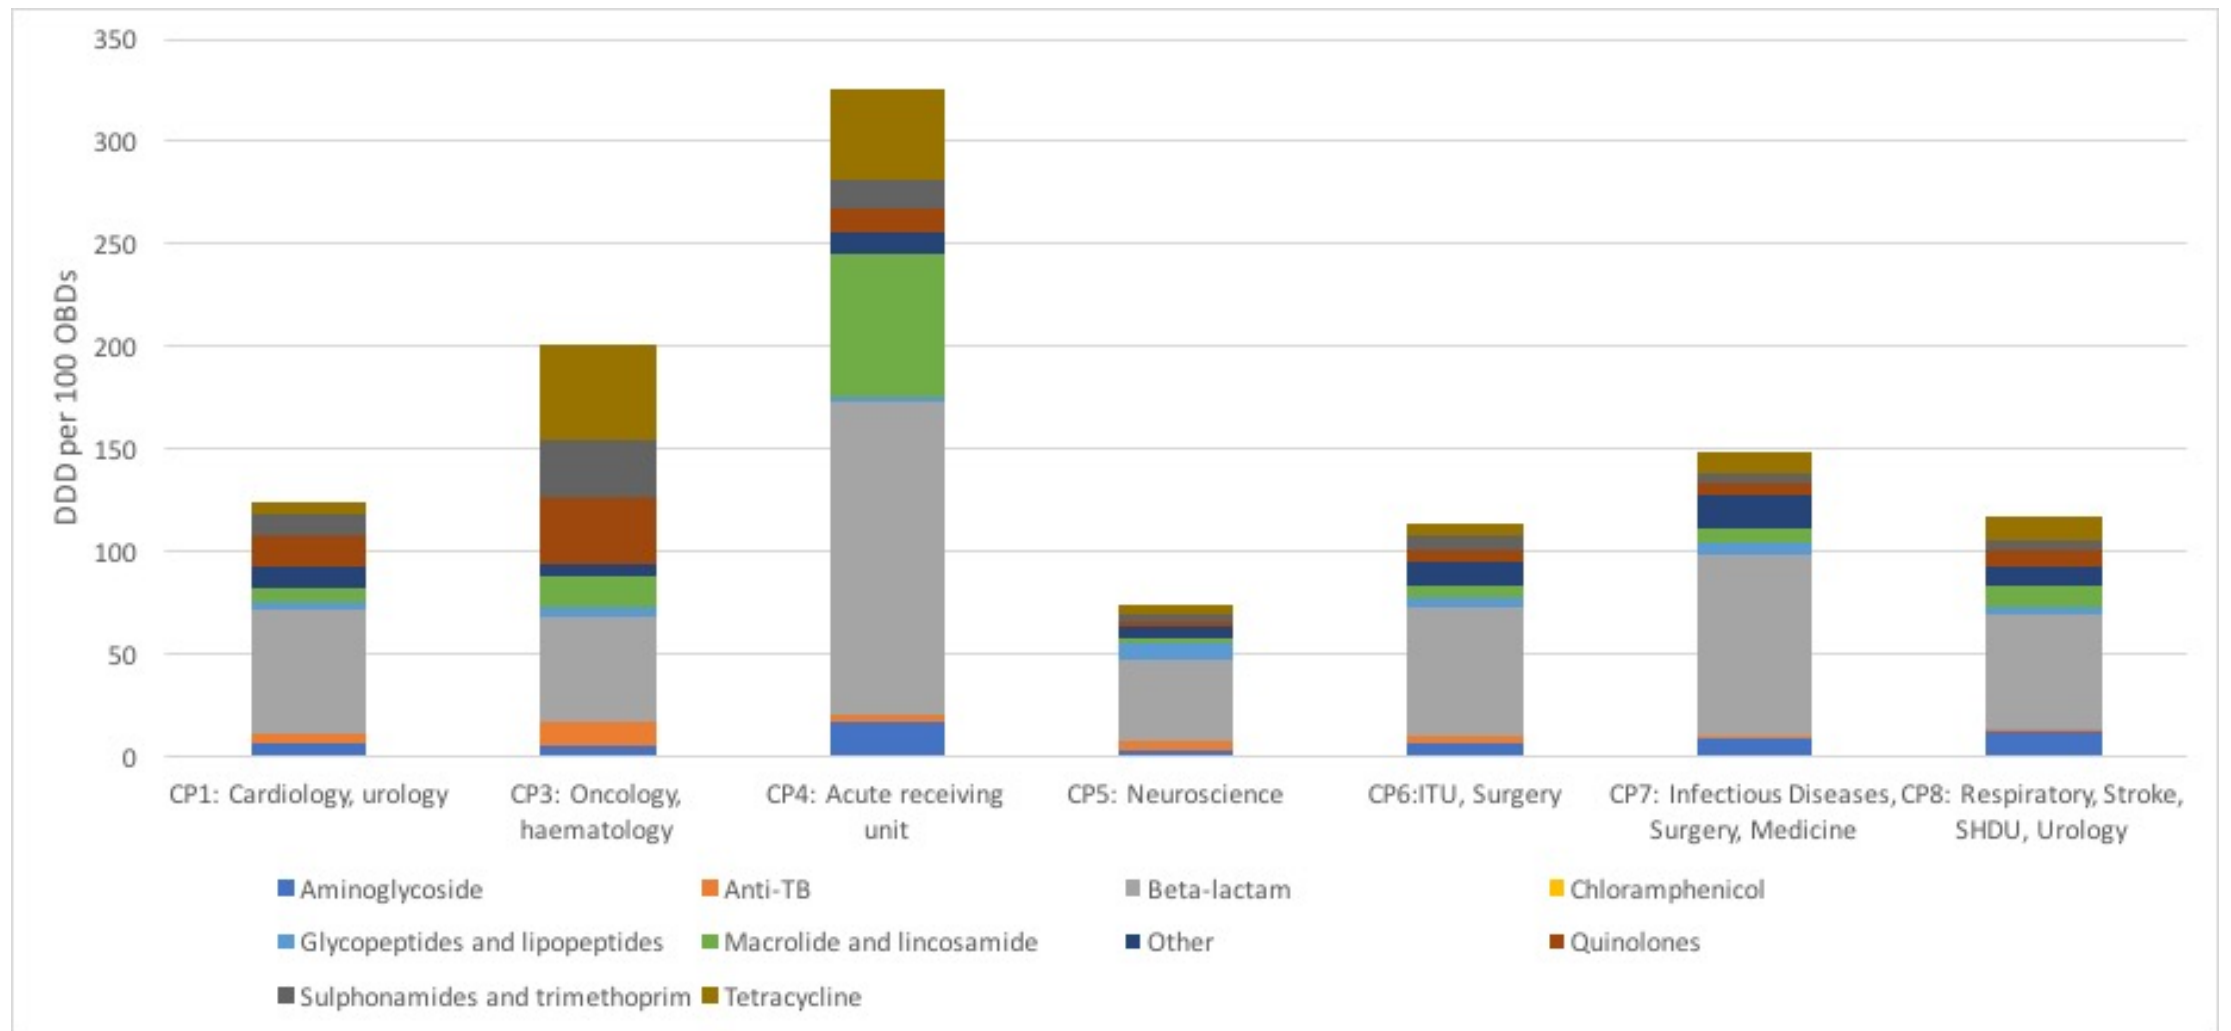

**Supplementary Figure 2** Antimicrobial consumption by class over different hospital departments

Pharmacy issues to the wards within the collection points were collated over a three -month period and defined daily dose (DDD) per 100 occupied bed days (OBD) calculated to represent the antimicrobial consumption at each collection point.

DDD= defined daily dose, OBD = occupied bed day, ITU=intensive care unit, SHDU = surgical high dependency unit.

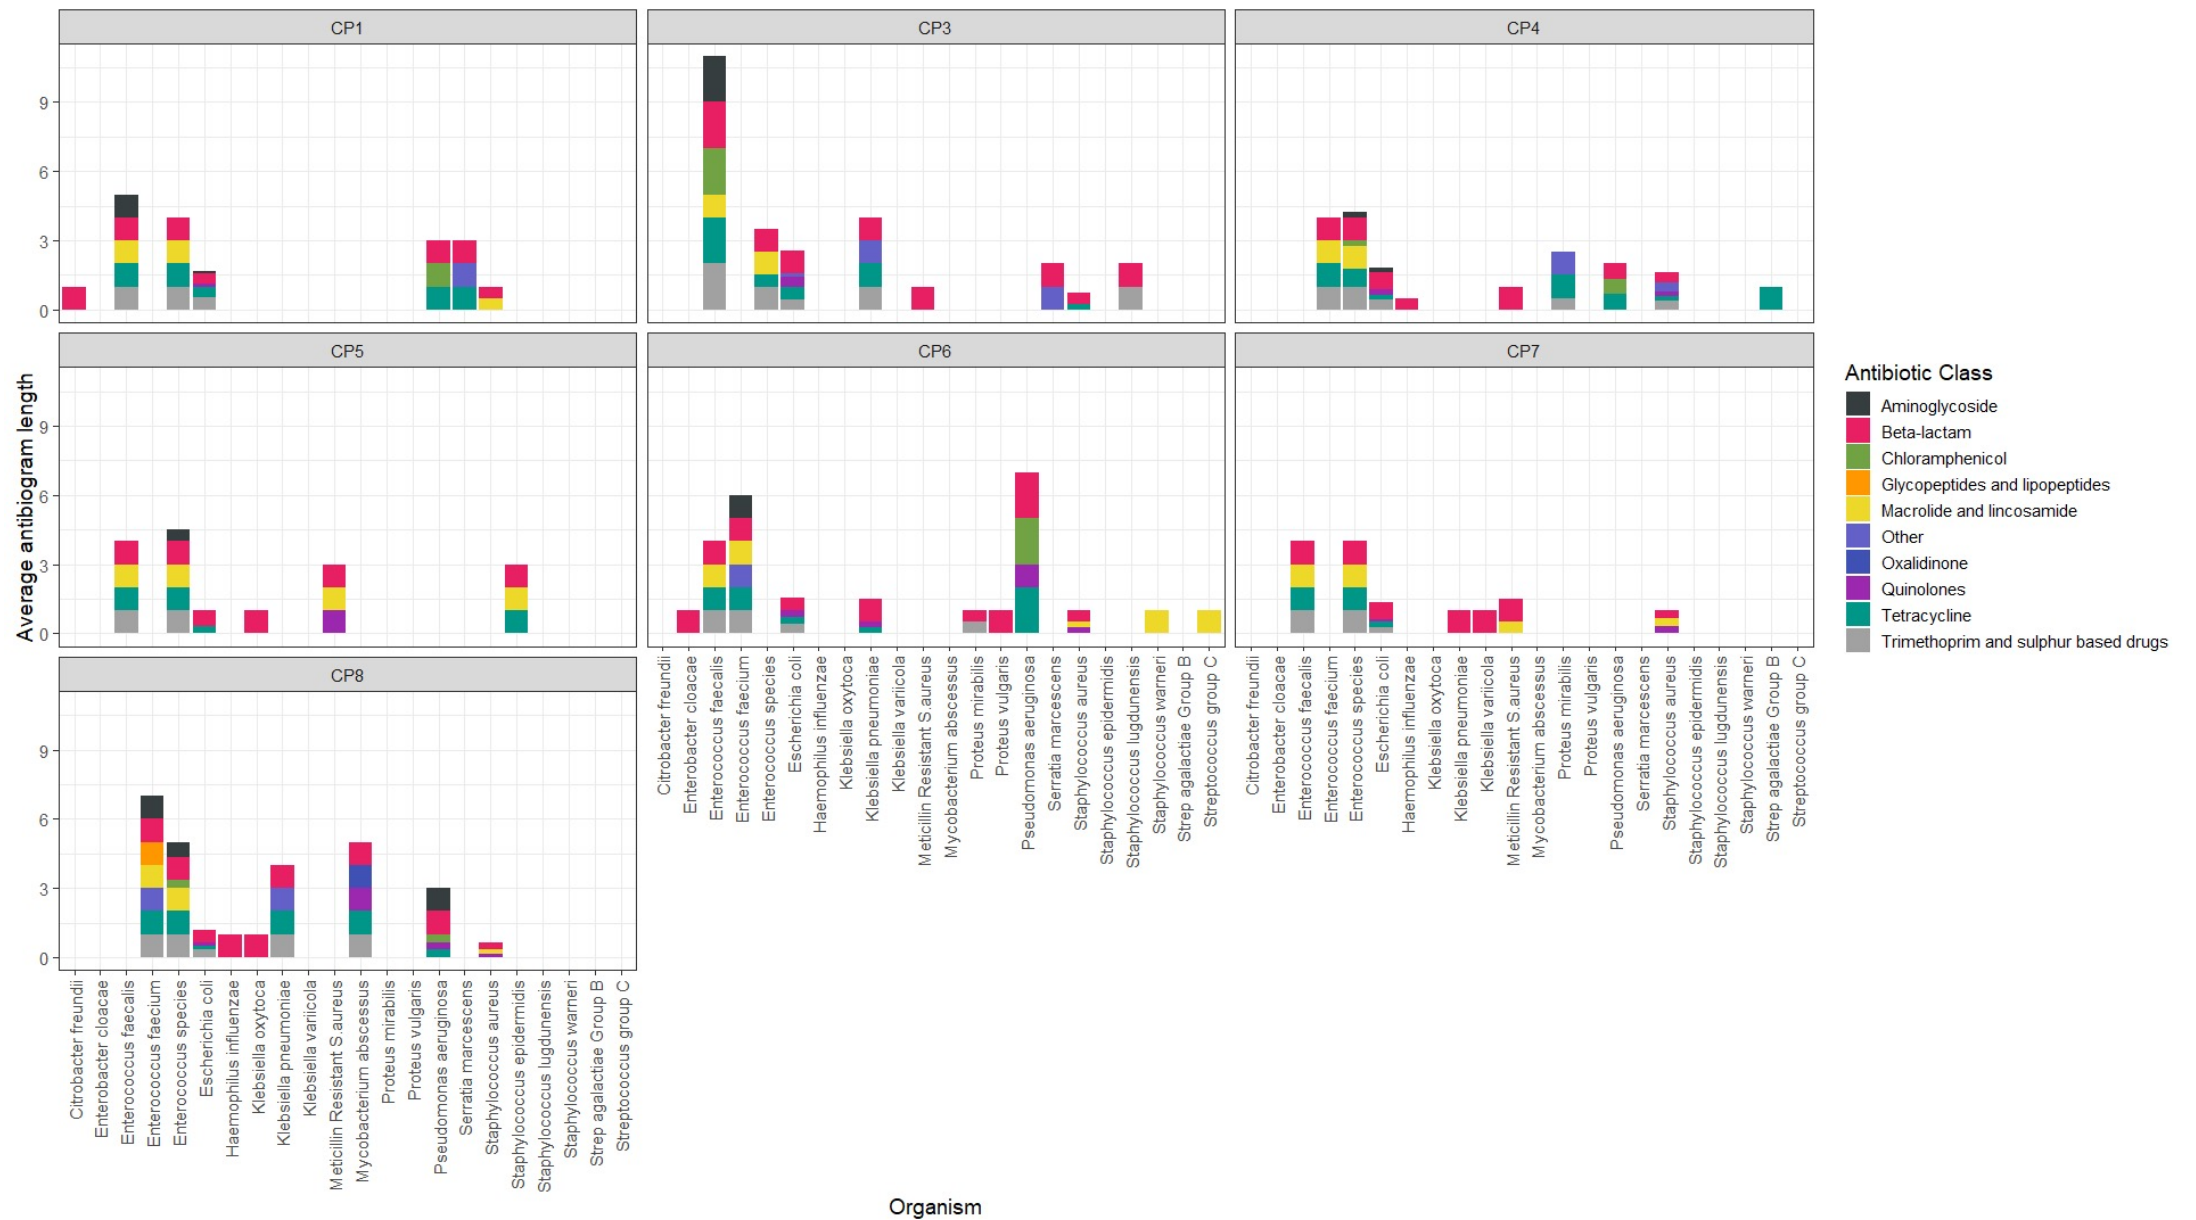

**Supplementary Figure 3** Phenotypic resistance in clinical isolates by antimicrobial class represented by average antibiogram length per organism at each collection point

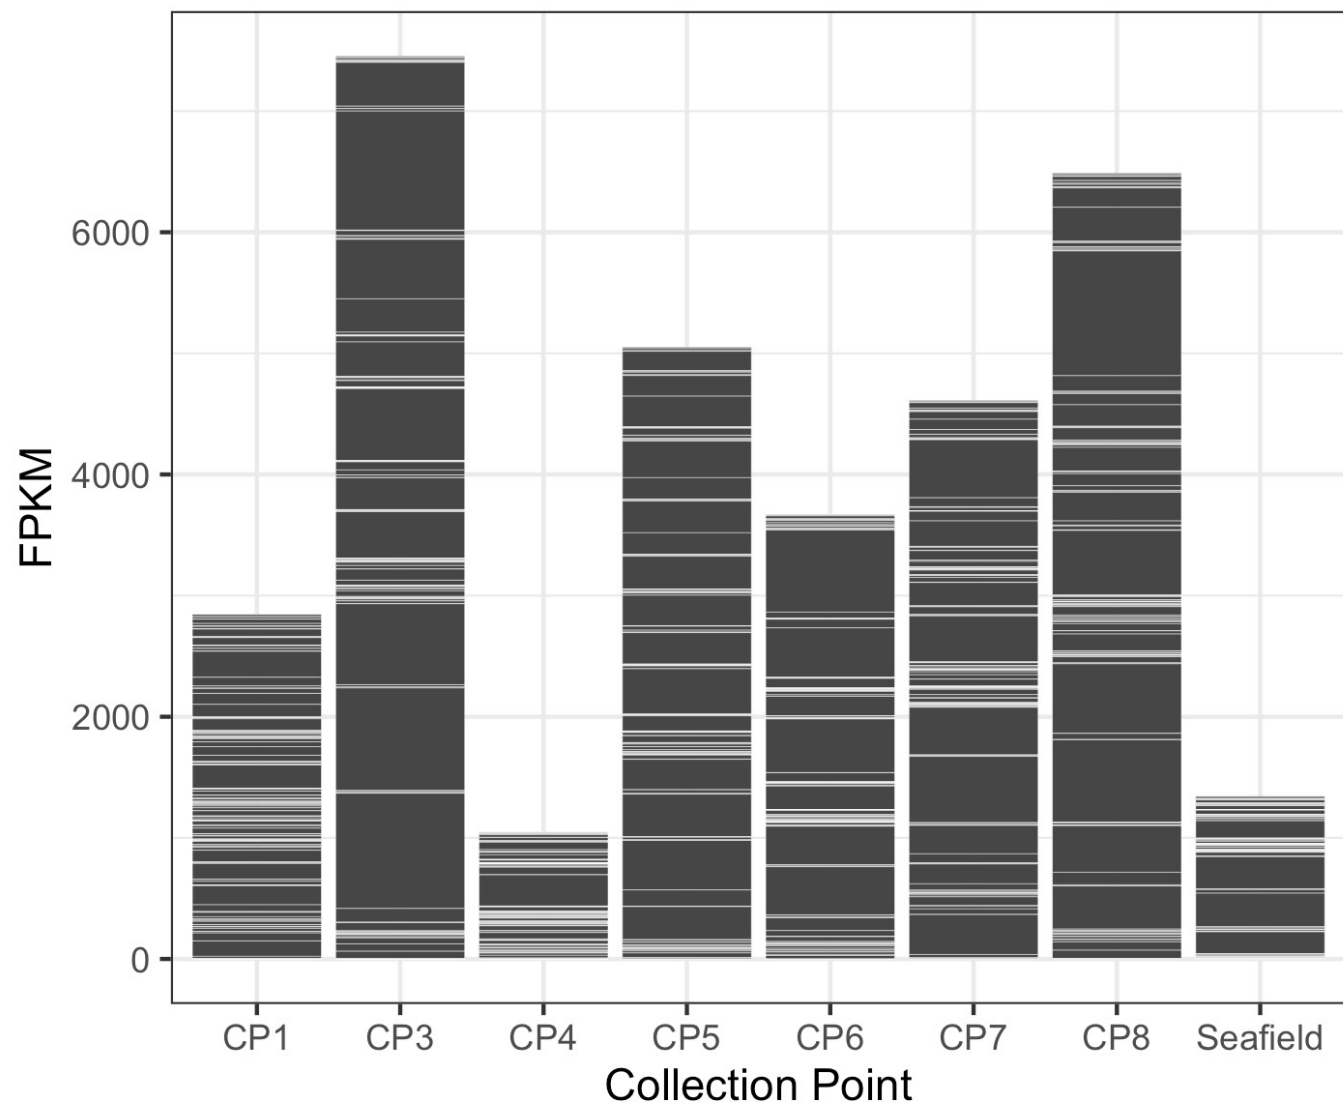

**Supplementary Figure 4** Total AMR gene abundance in FPKM



Correlation: 0.906  
p-value = 0.014, n = 8

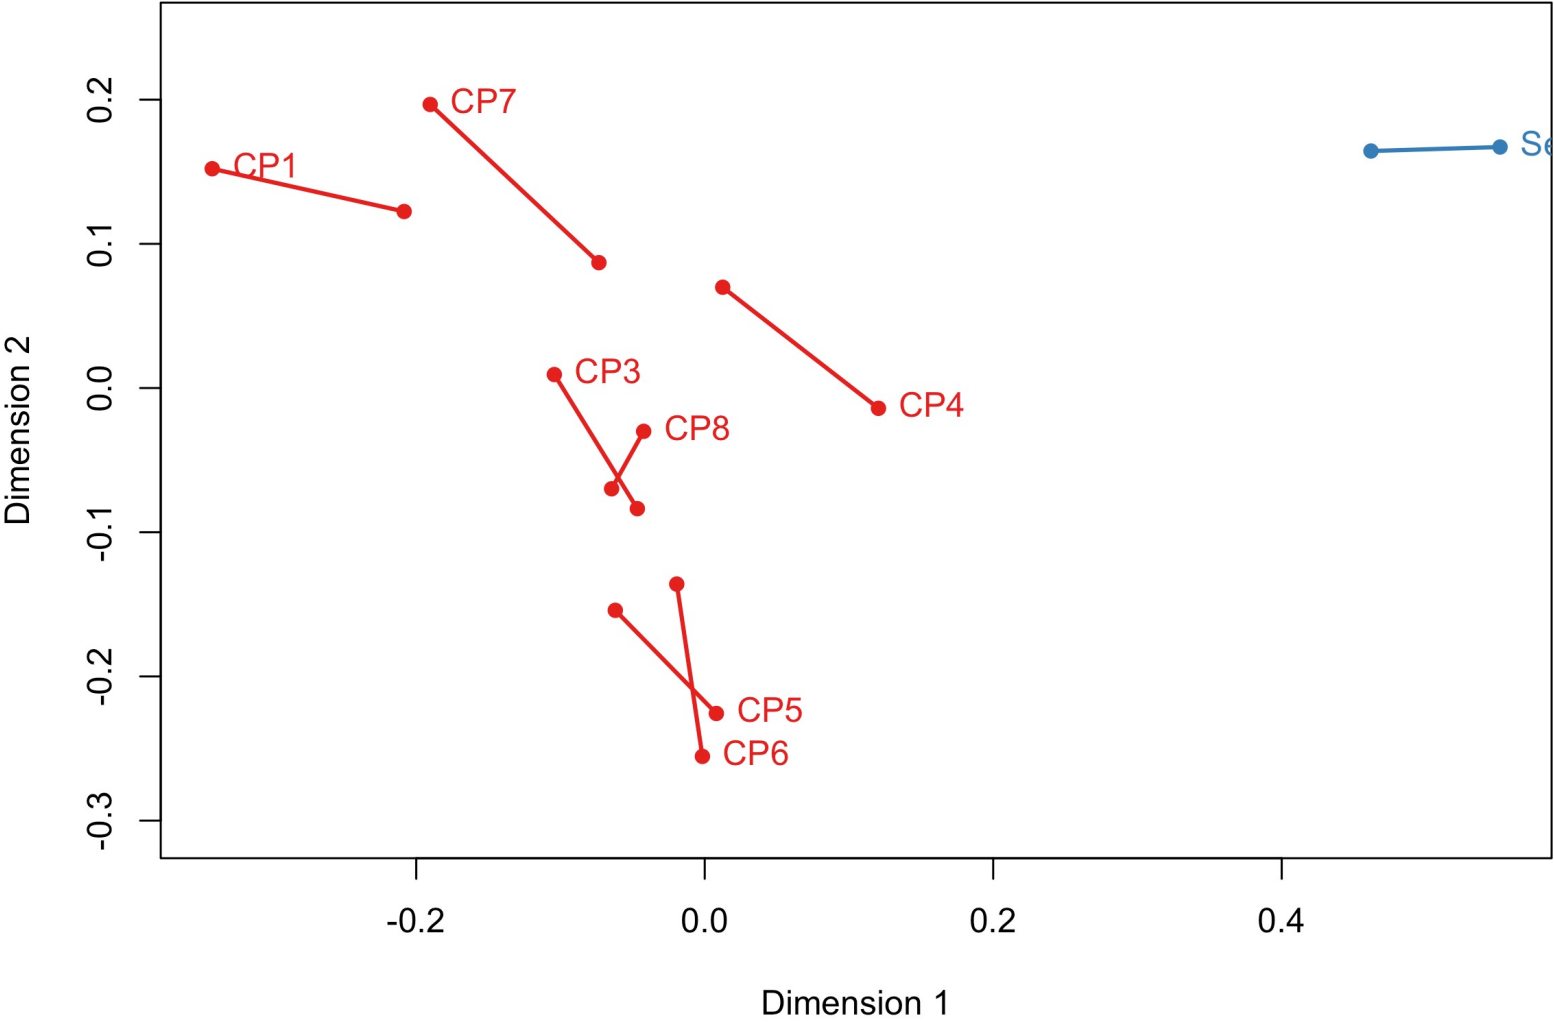

**Supplementary Figure 5** Procrustes analysis on ordinations of AMR genes and bacterial composition

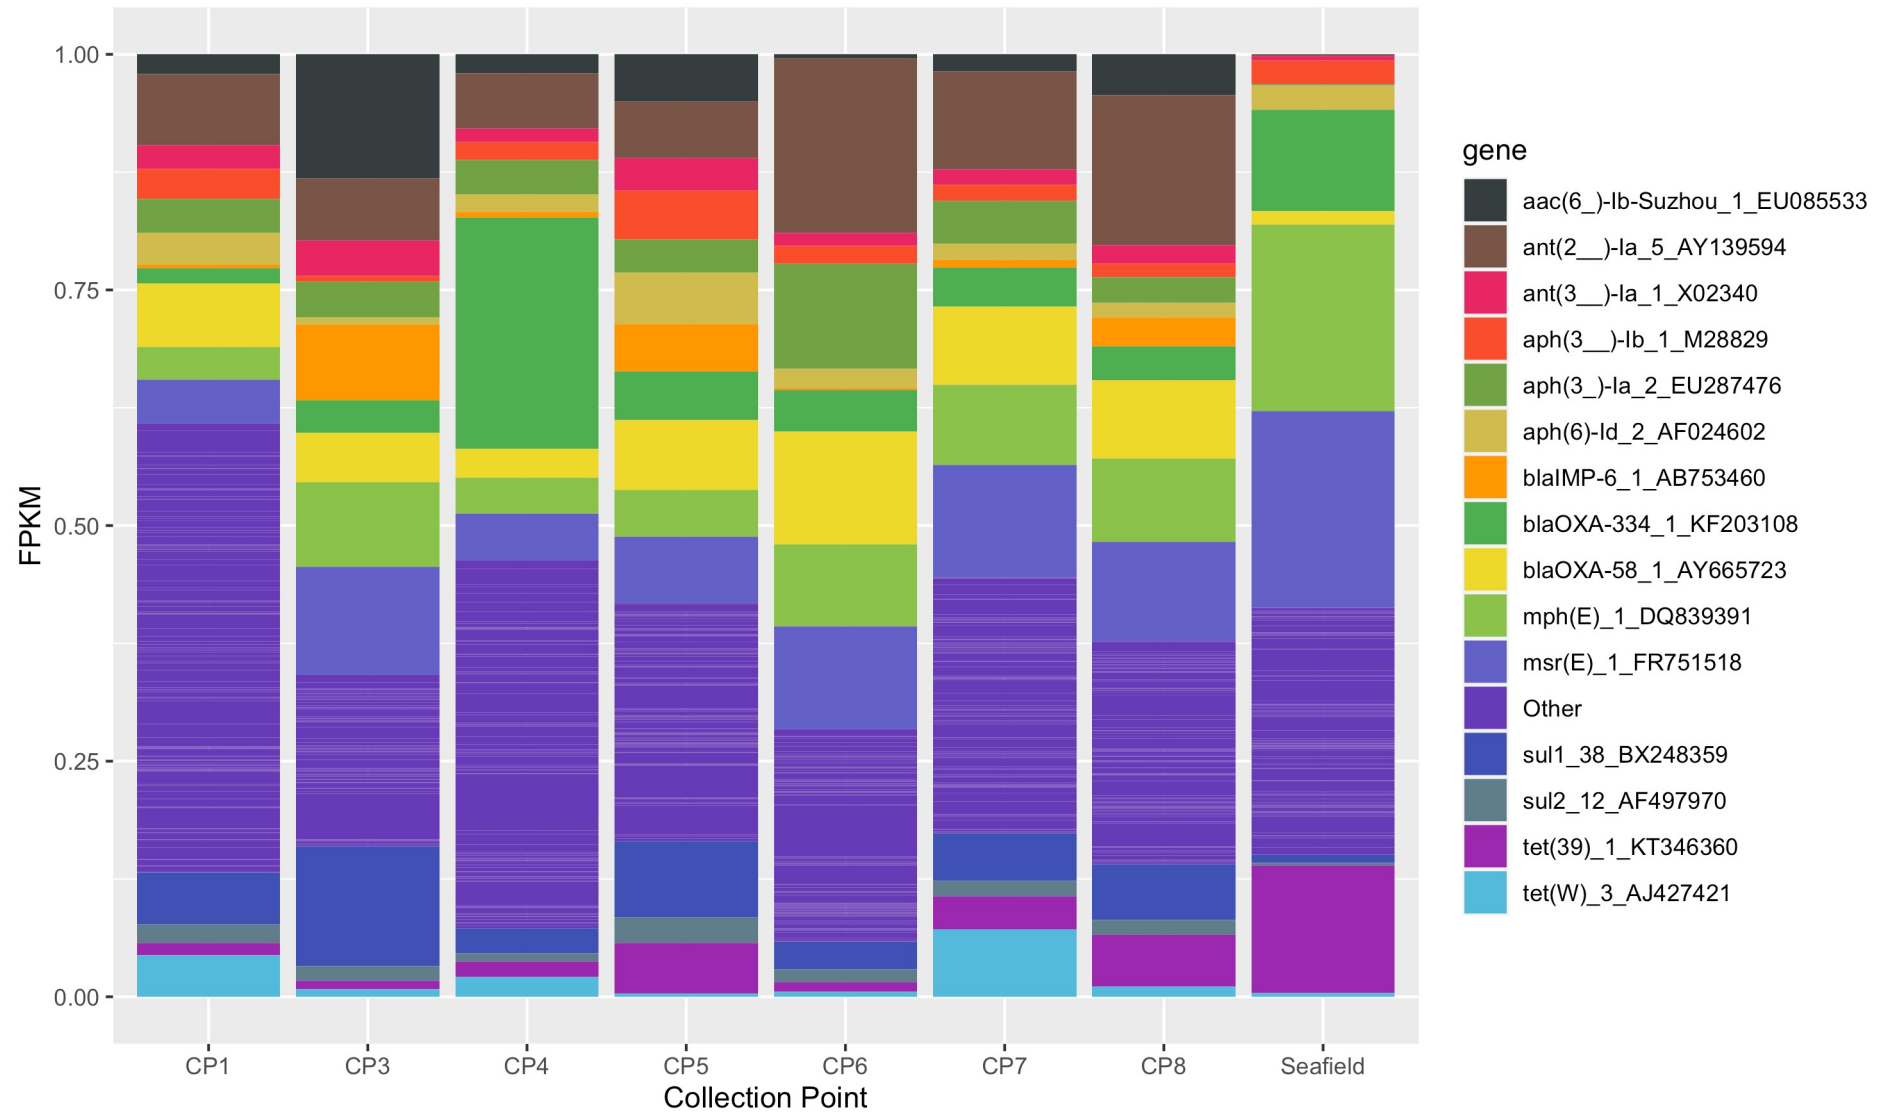

**Supplementary Figure 6** Fifteen most common AMR genes relative to total abundance within samples

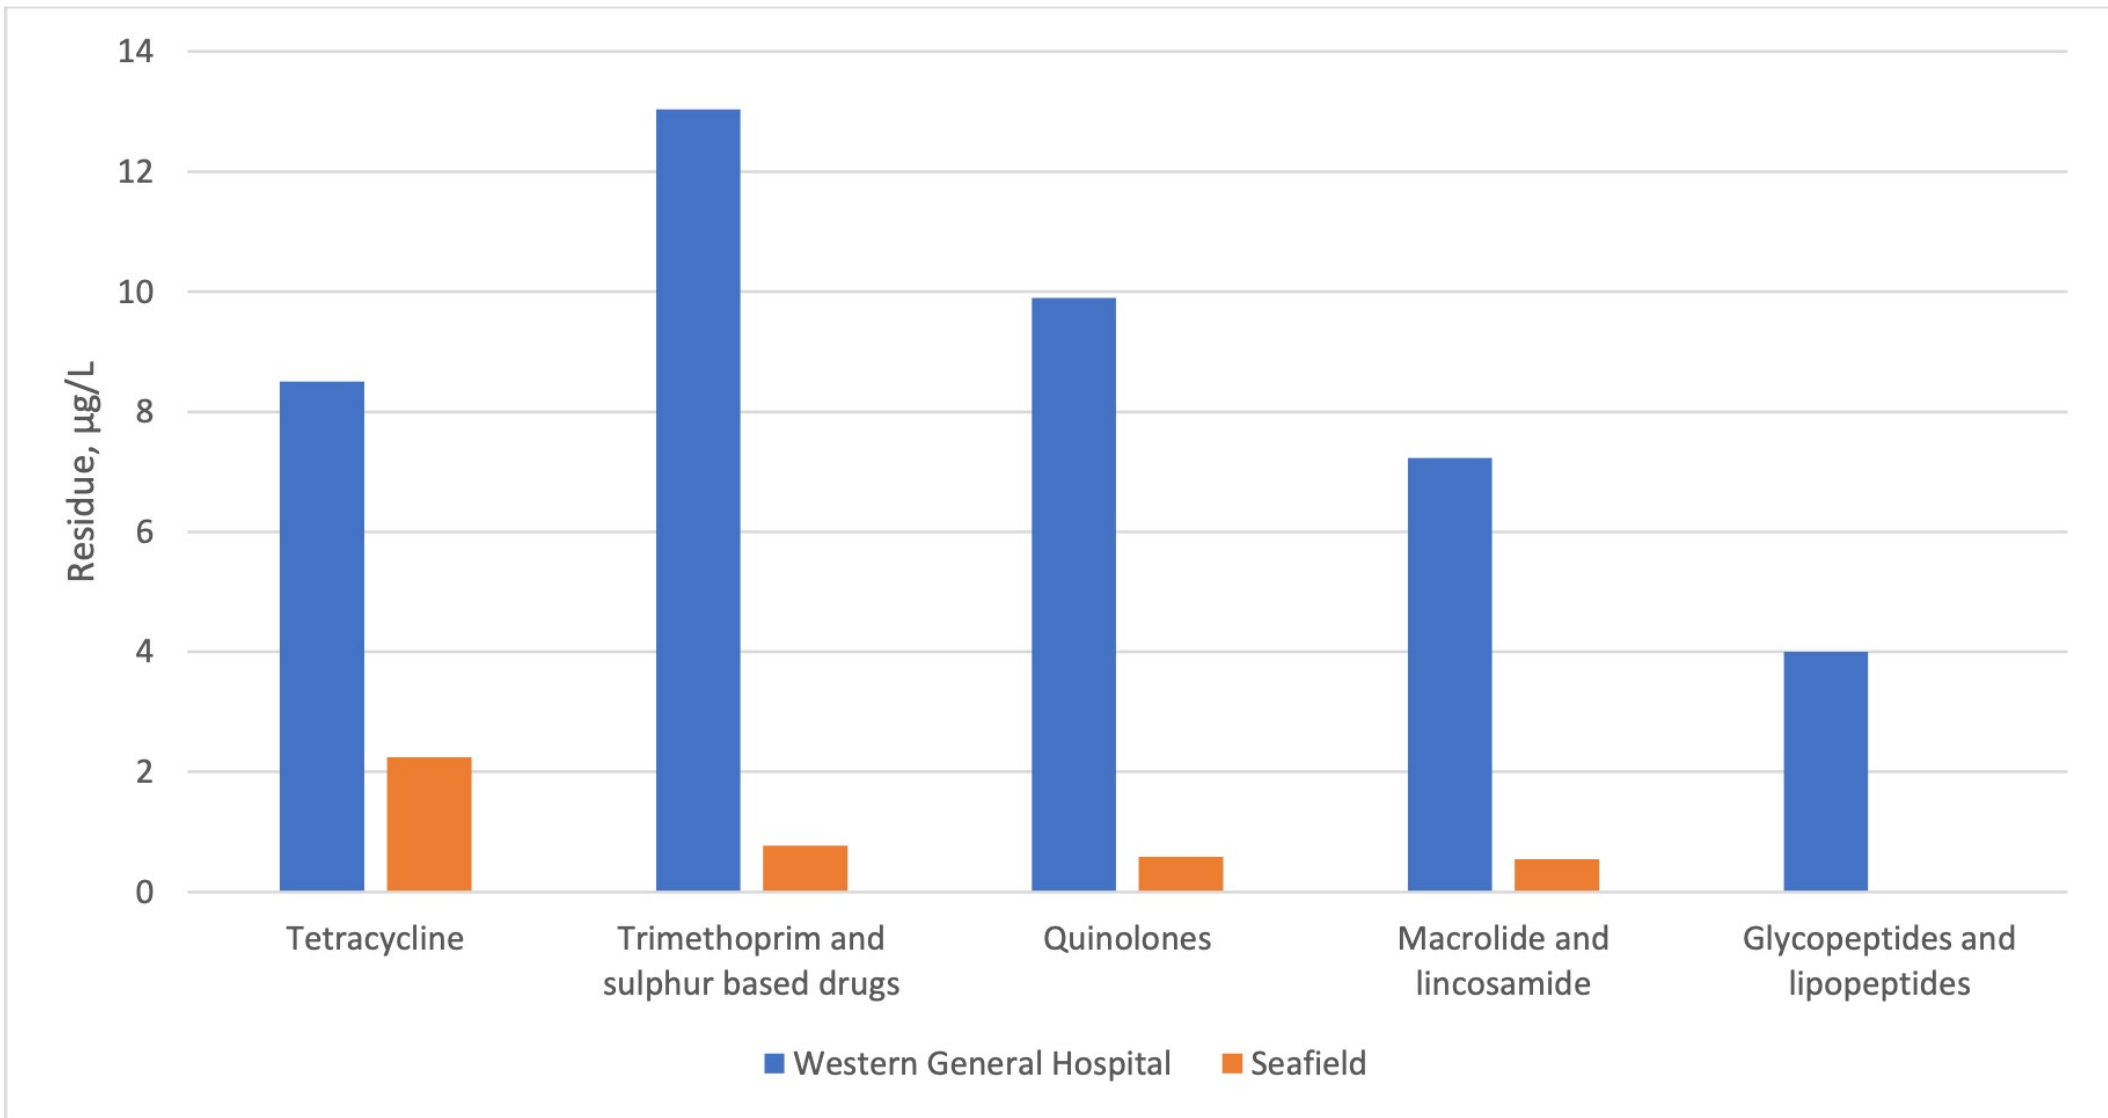

**Supplementary Figure 7** Antibiotic residues from composite hospital wastewater sample and urban sewage as measured by LC-MS/MS

Table S2

| Bacterial genus                | CP1     | CP3     | CP4      | CP5     | CP6     | CP7     | CP8     | Seafield |
|--------------------------------|---------|---------|----------|---------|---------|---------|---------|----------|
| <b>Acinetobacter</b>           | 1604595 | 8858221 | 14545264 | 9253608 | 5301071 | 6084958 | 7617102 | 9367455  |
| <b>Moraxella</b>               | 5012    | 8479    | 22845    | 8956    | 4858    | 8743    | 6683    | 751049   |
| <b>Psychrobacter</b>           | 1252    | 5393    | 13810    | 2168    | 808     | 2426    | 2179    | 247366   |
| <b>Pseudomonas</b>             | 1337571 | 2075434 | 3603155  | 1362168 | 7330230 | 1387450 | 2464891 | 8155080  |
| <b>Azotobacter</b>             | 3588    | 4395    | 3655     | 5564    | 3015    | 2741    | 3052    | 4728     |
| <b>Oblitimonas</b>             | 251     | 661     | 1513     | 339     | 133     | 257     | 484     | 1117     |
| <b>Klebsiella</b>              | 854067  | 61633   | 42472    | 220763  | 62338   | 210958  | 324999  | 55315    |
| <b>Escherichia</b>             | 626094  | 64854   | 49225    | 126536  | 1116220 | 210557  | 327398  | 26513    |
| <b>Citrobacter</b>             | 27522   | 14909   | 40420    | 54589   | 13373   | 38541   | 58932   | 49004    |
| <b>Enterobacter</b>            | 25852   | 13976   | 31045    | 30815   | 26297   | 53850   | 35869   | 95756    |
| <b>Salmonella</b>              | 5921    | 2945    | 3674     | 3677    | 2605    | 4764    | 3806    | 8412     |
| <b>Candidatus Blochmannia</b>  | 313     | 156     | 174      | 128     | 63      | 152     | 312     | 239      |
| <b>Candidatus Hamiltonella</b> | 158     | 136     | 214      | 109     | 86      | 149     | 206     | 843      |
| <b>Candidatus Doolittlea</b>   | 90      | 27      | 13       | 10      | 9       | 26      | 25      | 35       |
| <b>Candidatus Tachikawaea</b>  | 47      | 24      | 13       | 7       | 10      | 25      | 29      | 28       |
| <b>Candidatus Hoaglandella</b> | 39      | 45      | 19       | 18      | 12      | 26      | 35      | 36       |
| <b>Candidatus Purcelliella</b> | 33      | 27      | 23       | 32      | 4       | 22      | 15      | 56       |
| <b>Candidatus Annandia</b>     | 32      | 15      | 1        | 5       | 1       | 12      | 6       | 15       |
| <b>Candidatus Gullanella</b>   | 29      | 19      | 35       | 6       | 10      | 42      | 11      | 34       |
| <b>Candidatus Mikella</b>      | 17      | 15      | 38       | 13      | 4       | 10      | 17      | 14       |
| <b>Raoultella</b>              | 3701    | 7294    | 3595     | 7532    | 5081    | 11160   | 15986   | 21321    |
| <b>Cronobacter</b>             | 2664    | 1892    | 1710     | 1864    | 1033    | 2194    | 2214    | 5896     |
| <b>Shigella</b>                | 2149    | 218     | 131      | 299     | 1123    | 359     | 1077    | 325      |
| <b>Kosakonia</b>               | 1948    | 1211    | 1999     | 1278    | 925     | 1741    | 1294    | 5056     |
| <b>Pluralibacter</b>           | 1826    | 1032    | 1005     | 1264    | 632     | 1387    | 1128    | 2605     |
| <b>Lelliottia</b>              | 1314    | 893     | 1444     | 2044    | 727     | 1416    | 1035    | 65515    |
| <b>Cedecea</b>                 | 1186    | 941     | 1520     | 912     | 538     | 1124    | 885     | 5535     |
| <b>Metakosakonia</b>           | 793     | 115     | 281      | 427     | 223     | 660     | 447     | 206      |
| <b>Leclercia</b>               | 694     | 736     | 2595     | 555     | 437     | 604     | 607     | 5465     |
| <b>Gibbsiella</b>              | 467     | 313     | 590      | 513     | 240     | 394     | 363     | 818      |
| <b>Kluyvera</b>                | 411     | 175     | 625      | 167     | 606     | 1107    | 266     | 36089    |
| <b>Atlantibacter</b>           | 364     | 672     | 168      | 267     | 169     | 293     | 274     | 1206     |
| <b>Shimwellia</b>              | 343     | 196     | 163      | 189     | 110     | 228     | 213     | 710      |
| <b>Buttiauxella</b>            | 224     | 377     | 1407     | 353     | 132     | 249     | 224     | 41672    |
| <b>Limnobaculum</b>            | 185     | 128     | 915      | 67      | 58      | 177     | 185     | 357      |
| <b>Candidatus Ishikawaella</b> | 69      | 28      | 16       | 20      | 4       | 32      | 25      | 113      |
| <b>Candidatus Riesia</b>       | 49      | 51      | 14       | 18      | 17      | 80      | 48      | 43       |
| <b>Candidatus Moranella</b>    | 47      | 31      | 5        | 22      | 11      | 19      | 22      | 17       |

|                             |        |        |        |        |       |       |       |        |
|-----------------------------|--------|--------|--------|--------|-------|-------|-------|--------|
| <b>Serratia</b>             | 12923  | 18865  | 8705   | 18952  | 5314  | 10265 | 9238  | 45081  |
| <b>Yersinia</b>             | 5281   | 2627   | 7156   | 12727  | 2233  | 2806  | 2213  | 105850 |
| <b>Rahnella</b>             | 1273   | 1174   | 938    | 1099   | 881   | 1033  | 1196  | 75871  |
| <b>Chania</b>               | 278    | 215    | 171    | 253    | 119   | 286   | 231   | 629    |
| <b>Candidatus Fukatsuia</b> | 117    | 169    | 109    | 399    | 49    | 141   | 137   | 175    |
| <b>Proteus</b>              | 7858   | 1200   | 3296   | 1661   | 11821 | 2600  | 1410  | 2789   |
| <b>Morganella</b>           | 4465   | 3104   | 1067   | 2398   | 3100  | 2455  | 2519  | 1460   |
| <b>Providencia</b>          | 927    | 1559   | 5254   | 863    | 500   | 1305  | 1399  | 3933   |
| <b>Xenorhabdus</b>          | 717    | 728    | 2760   | 391    | 356   | 675   | 594   | 1978   |
| <b>Photorhabdus</b>         | 360    | 403    | 1838   | 286    | 131   | 345   | 367   | 1133   |
| <b>Arsenophonus</b>         | 124    | 165    | 167    | 27     | 45    | 81    | 65    | 230    |
| <b>Dickeya</b>              | 4408   | 3710   | 3294   | 4274   | 1883  | 3607  | 3502  | 7807   |
| <b>Pectobacterium</b>       | 1875   | 1692   | 2195   | 1728   | 742   | 1852  | 1603  | 6714   |
| <b>Brenneria</b>            | 898    | 747    | 1141   | 668    | 341   | 832   | 677   | 1167   |
| <b>Sodalis</b>              | 855    | 710    | 526    | 607    | 361   | 713   | 487   | 762    |
| <b>Lonsdalea</b>            | 227    | 194    | 124    | 266    | 138   | 179   | 186   | 311    |
| <b>Pantoea</b>              | 3335   | 2832   | 4232   | 2967   | 1553  | 3335  | 2551  | 8308   |
| <b>Erwinia</b>              | 1604   | 1419   | 2176   | 1485   | 777   | 1395  | 1401  | 5097   |
| <b>Buchnera</b>             | 459    | 416    | 135    | 202    | 120   | 280   | 273   | 420    |
| <b>Mixta</b>                | 365    | 306    | 233    | 322    | 173   | 272   | 237   | 422    |
| <b>Tatumella</b>            | 334    | 322    | 199    | 211    | 132   | 325   | 227   | 638    |
| <b>Wigglesworthia</b>       | 51     | 44     | 26     | 22     | 11    | 39    | 36    | 137    |
| <b>Plesiomonas</b>          | 2831   | 542    | 273    | 726    | 172   | 1557  | 761   | 1350   |
| <b>Phytobacter</b>          | 1833   | 953    | 2854   | 1000   | 2232  | 3887  | 1244  | 648    |
| <b>Edwardsiella</b>         | 1705   | 1265   | 1197   | 1227   | 672   | 1609  | 1110  | 1526   |
| <b>Hafnia</b>               | 451    | 625    | 1257   | 2323   | 762   | 1064  | 1375  | 6343   |
| <b>Obesumbacterium</b>      | 117    | 80     | 53     | 111    | 865   | 334   | 124   | 1872   |
| <b>Leminorella</b>          | 337    | 195    | 171    | 164    | 94    | 338   | 150   | 318    |
| <b>Pragia</b>               | 295    | 347    | 723    | 145    | 160   | 401   | 252   | 1010   |
| <b>Stenotrophomonas</b>     | 129607 | 272935 | 232378 | 137529 | 46509 | 37691 | 55058 | 58882  |
| <b>Xanthomonas</b>          | 66411  | 49720  | 39052  | 65787  | 20620 | 22048 | 33576 | 24331  |
| <b>Lysobacter</b>           | 65277  | 36462  | 24246  | 49947  | 12289 | 13463 | 25705 | 18990  |
| <b>Pseudoxanthomonas</b>    | 48212  | 23750  | 15725  | 43240  | 14476 | 9043  | 14187 | 8727   |
| <b>Luteimonas</b>           | 36083  | 17673  | 12756  | 25889  | 5827  | 6881  | 10198 | 8315   |
| <b>Xylella</b>              | 1063   | 716    | 504    | 949    | 277   | 528   | 634   | 724    |
| <b>Dyella</b>               | 9855   | 7904   | 3067   | 6179   | 2361  | 3569  | 5141  | 2283   |
| <b>Dokdonella</b>           | 8473   | 6873   | 1991   | 4290   | 1666  | 2163  | 5308  | 1386   |
| <b>Rhodanobacter</b>        | 5853   | 4424   | 1936   | 4384   | 1213  | 2151  | 3149  | 1353   |
| <b>Luteibacter</b>          | 2311   | 1914   | 701    | 1413   | 642   | 1041  | 1278  | 581    |
| <b>Ahniella</b>             | 1070   | 837    | 494    | 751    | 355   | 450   | 631   | 464    |

|                                 |       |       |       |       |       |        |        |        |
|---------------------------------|-------|-------|-------|-------|-------|--------|--------|--------|
| <b>Frateuria</b>                | 918   | 776   | 822   | 743   | 303   | 503    | 616    | 455    |
| <b>Haemophilus</b>              | 49097 | 12316 | 3163  | 3159  | 3787  | 17155  | 10240  | 5388   |
| <b>Aggregatibacter</b>          | 973   | 744   | 525   | 302   | 229   | 684    | 615    | 1069   |
| <b>Actinobacillus</b>           | 892   | 716   | 982   | 416   | 220   | 777    | 596    | 1438   |
| <b>Pasteurella</b>              | 623   | 1649  | 1553  | 565   | 220   | 555    | 1077   | 1769   |
| <b>Mannheimia</b>               | 522   | 461   | 1258  | 373   | 156   | 471    | 404    | 1070   |
| <b>Glaesserella</b>             | 363   | 287   | 570   | 120   | 123   | 282    | 285    | 739    |
| <b>Avibacterium</b>             | 197   | 171   | 1285  | 103   | 69    | 151    | 332    | 445    |
| <b>Histophilus</b>              | 191   | 141   | 80    | 88    | 48    | 143    | 219    | 315    |
| <b>Bibersteinia</b>             | 167   | 184   | 344   | 53    | 34    | 176    | 124    | 314    |
| <b>Basfia</b>                   | 118   | 103   | 538   | 57    | 33    | 150    | 158    | 224    |
| <b>Gallibacterium</b>           | 116   | 172   | 152   | 70    | 58    | 153    | 129    | 324    |
| <b>Aeromonas</b>                | 46560 | 29421 | 45972 | 52462 | 52976 | 189850 | 169742 | 613987 |
| <b>Tolomonas</b>                | 1346  | 1079  | 417   | 641   | 290   | 1022   | 832    | 10857  |
| <b>Zobellella</b>               | 1154  | 853   | 703   | 921   | 512   | 828    | 706    | 691    |
| <b>Oceanimonas</b>              | 631   | 501   | 519   | 441   | 271   | 512    | 407    | 592    |
| <b>Oceanisphaera</b>            | 331   | 311   | 1958  | 477   | 128   | 411    | 253    | 984    |
| <b>Thioalkalivibrio</b>         | 4654  | 3009  | 2298  | 3284  | 1563  | 2496   | 2569   | 1652   |
| <b>Acidihalobacter</b>          | 2325  | 1818  | 1420  | 2218  | 795   | 1297   | 1469   | 1305   |
| <b>Ectothiorhodospira</b>       | 1105  | 877   | 645   | 853   | 354   | 829    | 705    | 635    |
| <b>Halorhodospira</b>           | 911   | 582   | 526   | 612   | 341   | 665    | 470    | 383    |
| <b>Alkalilimnicola</b>          | 819   | 604   | 536   | 725   | 303   | 484    | 485    | 311    |
| <b>Spiribacter</b>              | 466   | 338   | 276   | 442   | 186   | 421    | 329    | 286    |
| <b>Thiodictyon</b>              | 1590  | 1288  | 805   | 1414  | 598   | 964    | 829    | 749    |
| <b>Marichromatium</b>           | 1131  | 749   | 581   | 944   | 464   | 644    | 590    | 377    |
| <b>Allochromatium</b>           | 1047  | 683   | 520   | 720   | 366   | 516    | 468    | 364    |
| <b>Thioflavococcus</b>          | 984   | 749   | 520   | 632   | 349   | 609    | 556    | 414    |
| <b>Thiocystis</b>               | 875   | 792   | 520   | 745   | 383   | 547    | 550    | 480    |
| <b>Nitrosococcus</b>            | 423   | 378   | 283   | 282   | 152   | 381    | 278    | 476    |
| <b>Rheinheimera</b>             | 190   | 322   | 463   | 1077  | 146   | 301    | 174    | 543    |
| <b>Candidatus Nitrosoglobus</b> | 156   | 74    | 391   | 135   | 28    | 88     | 92     | 256    |
| <b>Sulfurivermis</b>            | 1956  | 1047  | 746   | 1748  | 603   | 1020   | 993    | 651    |
| <b>Halothiobacillus</b>         | 846   | 765   | 503   | 800   | 422   | 724    | 632    | 672    |
| <b>Wenzhouxiangella</b>         | 800   | 617   | 359   | 742   | 295   | 478    | 479    | 294    |
| <b>Sulfuriflexus</b>            | 334   | 274   | 261   | 193   | 101   | 287    | 292    | 221    |
| <b>Granulosicoccus</b>          | 319   | 221   | 230   | 265   | 124   | 282    | 229    | 293    |
| <b>Woeseia</b>                  | 313   | 254   | 150   | 191   | 114   | 233    | 239    | 184    |
| <b>Halomonas</b>                | 9330  | 8146  | 8044  | 8597  | 3970  | 7061   | 7016   | 7430   |
| <b>Halotalea</b>                | 955   | 820   | 575   | 997   | 458   | 588    | 591    | 512    |
| <b>Salinicola</b>               | 833   | 684   | 505   | 809   | 371   | 630    | 599    | 406    |

|                              |      |      |       |      |      |      |      |        |
|------------------------------|------|------|-------|------|------|------|------|--------|
| <b>Kushneria</b>             | 804  | 547  | 423   | 591  | 311  | 649  | 502  | 492    |
| <b>Chromohalobacter</b>      | 652  | 516  | 406   | 653  | 292  | 369  | 372  | 357    |
| <b>Cobetia</b>               | 436  | 378  | 235   | 381  | 176  | 318  | 283  | 328    |
| <b>Zymobacter</b>            | 235  | 204  | 419   | 192  | 79   | 228  | 139  | 153    |
| <b>Candidatus Carsonella</b> | 22   | 31   | 15    | 14   | 14   | 19   | 17   | 28     |
| <b>Candidatus Evansia</b>    | 22   | 14   | 18    | 6    | 4    | 21   | 20   | 15     |
| <b>Candidatus Portiera</b>   | 8    | 9    | 15    | 14   | 2    | 11   | 8    | 25     |
| <b>Alcanivorax</b>           | 3246 | 2586 | 2890  | 3040 | 1645 | 2363 | 2488 | 2551   |
| <b>Ketobacter</b>            | 247  | 247  | 166   | 171  | 102  | 274  | 153  | 309    |
| <b>Marinobacterium</b>       | 597  | 542  | 374   | 716  | 343  | 503  | 500  | 557    |
| <b>Marinomonas</b>           | 562  | 609  | 1238  | 453  | 213  | 656  | 732  | 1628   |
| <b>Thalassolituus</b>        | 460  | 541  | 1805  | 570  | 138  | 347  | 510  | 1203   |
| <b>Bacterioplanes</b>        | 181  | 163  | 137   | 112  | 68   | 180  | 109  | 413    |
| <b>Oleispira</b>             | 131  | 386  | 322   | 998  | 52   | 280  | 192  | 963    |
| <b>Saccharospirillum</b>     | 377  | 291  | 230   | 305  | 185  | 357  | 298  | 307    |
| <b>Gynuella</b>              | 266  | 266  | 822   | 187  | 103  | 263  | 171  | 404    |
| <b>Reinekea</b>              | 187  | 177  | 123   | 201  | 91   | 157  | 155  | 223    |
| <b>Hahella</b>               | 650  | 606  | 726   | 598  | 328  | 605  | 486  | 708    |
| <b>Kangiella</b>             | 330  | 360  | 1822  | 240  | 123  | 262  | 360  | 981    |
| <b>Endozoicomonas</b>        | 223  | 263  | 389   | 132  | 61   | 278  | 150  | 347    |
| <b>Oleiphilus</b>            | 146  | 201  | 127   | 96   | 55   | 162  | 86   | 263    |
| <b>Marinobacter</b>          | 4332 | 3900 | 3863  | 4148 | 1849 | 3791 | 3502 | 4416   |
| <b>Alteromonas</b>           | 1407 | 1627 | 3882  | 1217 | 469  | 1361 | 1341 | 3069   |
| <b>Glaciecola</b>            | 741  | 852  | 849   | 911  | 279  | 585  | 990  | 744    |
| <b>Salinimonas</b>           | 322  | 263  | 174   | 211  | 101  | 296  | 187  | 542    |
| <b>Lacimicrobium</b>         | 240  | 210  | 440   | 158  | 126  | 273  | 159  | 327    |
| <b>Catenovulum</b>           | 155  | 204  | 872   | 137  | 57   | 152  | 127  | 309    |
| <b>Paraglaciecola</b>        | 122  | 153  | 162   | 103  | 39   | 138  | 128  | 428    |
| <b>Agarivorans</b>           | 117  | 76   | 139   | 95   | 41   | 84   | 133  | 246    |
| <b>Shewanella</b>            | 5072 | 5360 | 11262 | 6674 | 3964 | 4975 | 4756 | 817172 |
| <b>Pseudoalteromonas</b>     | 2321 | 4381 | 8330  | 2527 | 980  | 2795 | 3160 | 8340   |
| <b>Colwellia</b>             | 739  | 1443 | 3822  | 647  | 312  | 755  | 1376 | 2537   |
| <b>Thalassotalea</b>         | 134  | 117  | 67    | 58   | 21   | 111  | 71   | 487    |
| <b>Litorilituus</b>          | 63   | 114  | 661   | 51   | 30   | 79   | 154  | 351    |
| <b>Idiomarina</b>            | 437  | 464  | 845   | 277  | 165  | 386  | 484  | 954    |
| <b>Ferrimonas</b>            | 488  | 358  | 231   | 402  | 193  | 331  | 309  | 322    |
| <b>Moritella</b>             | 268  | 299  | 2237  | 309  | 111  | 264  | 253  | 883    |
| <b>Psychromonas</b>          | 255  | 328  | 715   | 340  | 78   | 218  | 212  | 676    |
| <b>Vibrio</b>                | 7078 | 7250 | 16650 | 6862 | 3018 | 7364 | 6597 | 23410  |
| <b>Photobacterium</b>        | 652  | 702  | 1337  | 431  | 518  | 748  | 521  | 1226   |

|                              |      |      |      |      |     |      |      |      |
|------------------------------|------|------|------|------|-----|------|------|------|
| <b>Aliivibrio</b>            | 482  | 433  | 1843 | 435  | 325 | 505  | 615  | 1180 |
| <b>Grimontia</b>             | 190  | 146  | 416  | 91   | 58  | 212  | 113  | 208  |
| <b>Paraphotobacterium</b>    | 92   | 47   | 29   | 41   | 33  | 120  | 85   | 137  |
| <b>Enterovibrio</b>          | 45   | 27   | 32   | 35   | 13  | 35   | 27   | 87   |
| <b>Methylomonas</b>          | 1959 | 2020 | 1131 | 1705 | 921 | 1579 | 1406 | 2093 |
| <b>Methylococcus</b>         | 1455 | 727  | 529  | 979  | 540 | 748  | 743  | 367  |
| <b>Methylomicrobium</b>      | 1282 | 944  | 701  | 1175 | 440 | 884  | 778  | 913  |
| <b>Methylocaldum</b>         | 908  | 765  | 452  | 853  | 395 | 547  | 532  | 579  |
| <b>Methylovulum</b>          | 374  | 3552 | 614  | 1831 | 554 | 1064 | 1194 | 2718 |
| <b>Thiohalobacter</b>        | 1020 | 866  | 574  | 832  | 365 | 688  | 667  | 516  |
| <b>Sedimenticola</b>         | 496  | 298  | 246  | 327  | 155 | 367  | 268  | 350  |
| <b>Candidatus Ruthia</b>     | 57   | 47   | 79   | 16   | 19  | 52   | 34   | 63   |
| <b>Thiolapillus</b>          | 305  | 201  | 182  | 213  | 90  | 286  | 193  | 207  |
| <b>Gallaecimonas</b>         | 239  | 243  | 164  | 174  | 64  | 271  | 181  | 354  |
| <b>Candidatus Thioglobus</b> | 235  | 221  | 607  | 79   | 64  | 131  | 329  | 434  |
| <b>Pseudohongiella</b>       | 206  | 173  | 155  | 101  | 75  | 189  | 110  | 271  |
| <b>Candidatus Nardonella</b> | 42   | 48   | 11   | 17   | 5   | 48   | 29   | 42   |
| <b>Cellvibrio</b>            | 1255 | 3710 | 1870 | 1342 | 549 | 919  | 982  | 1425 |
| <b>Simiduia</b>              | 334  | 344  | 314  | 333  | 135 | 290  | 243  | 470  |
| <b>Teredinibacter</b>        | 187  | 172  | 110  | 129  | 54  | 174  | 119  | 286  |
| <b>Saccharophagus</b>        | 128  | 179  | 346  | 102  | 38  | 84   | 71   | 226  |
| <b>Agarilytica</b>           | 123  | 122  | 595  | 59   | 51  | 107  | 185  | 231  |
| <b>Microbulbifer</b>         | 1203 | 1007 | 1824 | 871  | 434 | 1038 | 702  | 916  |
| <b>Halioglobus</b>           | 745  | 539  | 372  | 569  | 263 | 554  | 413  | 554  |
| <b>Congregibacter</b>        | 290  | 290  | 277  | 226  | 155 | 348  | 239  | 258  |
| <b>Zhongshania</b>           | 206  | 235  | 165  | 567  | 106 | 169  | 146  | 466  |
| <b>Oceanicoccus</b>          | 154  | 156  | 447  | 84   | 52  | 124  | 103  | 210  |
| <b>Spongiibacter</b>         | 113  | 155  | 240  | 111  | 44  | 83   | 106  | 329  |
| <b>Solimonas</b>             | 1973 | 1584 | 1133 | 1683 | 878 | 1071 | 1302 | 757  |
| <b>Steroidobacter</b>        | 1323 | 1151 | 865  | 1338 | 366 | 615  | 763  | 413  |
| <b>Methylophaga</b>          | 375  | 659  | 1200 | 435  | 140 | 358  | 327  | 1221 |
| <b>Thiomicrospira</b>        | 350  | 317  | 1141 | 210  | 109 | 309  | 581  | 782  |
| <b>Thiomicrothrix</b>        | 242  | 285  | 274  | 126  | 59  | 276  | 173  | 443  |
| <b>Cycloclasticus</b>        | 153  | 171  | 125  | 190  | 56  | 213  | 165  | 366  |
| <b>Hydrogenovibrio</b>       | 143  | 170  | 185  | 166  | 55  | 159  | 164  | 281  |
| <b>Piscirickettsia</b>       | 111  | 188  | 851  | 59   | 30  | 85   | 83   | 232  |
| <b>Francisella</b>           | 1083 | 921  | 1319 | 741  | 409 | 1041 | 1162 | 2049 |
| <b>Allofrancisella</b>       | 83   | 38   | 10   | 17   | 36  | 44   | 29   | 56   |
| <b>Thioploca</b>             | 144  | 152  | 94   | 51   | 54  | 107  | 91   | 262  |
| <b>Beggiatoa</b>             | 141  | 251  | 145  | 83   | 49  | 100  | 178  | 794  |



|                                |        |         |        |         |        |        |         |         |
|--------------------------------|--------|---------|--------|---------|--------|--------|---------|---------|
| <b>Legionella</b>              | 2004   | 2358    | 3480   | 1430    | 1037   | 1903   | 1674    | 2795    |
| <b>Tatlockia</b>               | 126    | 142     | 54     | 150     | 263    | 124    | 108     | 135     |
| <b>Fluoribacter</b>            | 81     | 51      | 33     | 40      | 24     | 91     | 60      | 119     |
| <b>Coxiella</b>                | 187    | 226     | 264    | 158     | 71     | 170    | 132     | 258     |
| <b>Rickettsiella</b>           | 44     | 73      | 562    | 49      | 33     | 59     | 45      | 124     |
| <b>Sulfurifustis</b>           | 1170   | 871     | 615    | 838     | 431    | 634    | 626     | 324     |
| <b>Sulfuricaulis</b>           | 840    | 647     | 367    | 677     | 351    | 525    | 448     | 430     |
| <b>Acidiferrobacter</b>        | 444    | 336     | 178    | 274     | 176    | 276    | 250     | 180     |
| <b>Immundisolibacter</b>       | 1537   | 1131    | 922    | 1373    | 558    | 918    | 947     | 604     |
| <b>Salinisphaera</b>           | 722    | 726     | 414    | 627     | 373    | 455    | 525     | 301     |
| <b>Cardiobacterium</b>         | 511    | 363     | 337    | 375     | 200    | 429    | 317     | 369     |
| <b>Dichelobacter</b>           | 151    | 153     | 554    | 56      | 56     | 135    | 103     | 395     |
| <b>Gilliamella</b>             | 166    | 230     | 107    | 84      | 55     | 207    | 222     | 433     |
| <b>Frischella</b>              | 98     | 69      | 46     | 34      | 38     | 64     | 109     | 150     |
| <b>Acidovorax</b>              | 781425 | 1369344 | 758282 | 1990867 | 326274 | 653834 | 1014081 | 1335766 |
| <b>Comamonas</b>               | 369001 | 91937   | 393272 | 153795  | 44170  | 82376  | 282577  | 364347  |
| <b>Delftia</b>                 | 125105 | 56636   | 63662  | 254659  | 56084  | 89227  | 172752  | 64968   |
| <b>Variovorax</b>              | 101855 | 139067  | 60486  | 191064  | 63874  | 53079  | 135785  | 66088   |
| <b>Ottowia</b>                 | 89737  | 39380   | 28935  | 427908  | 18443  | 40606  | 82365   | 43083   |
| <b>Alicyclophilus</b>          | 72772  | 74776   | 108903 | 96916   | 25107  | 25766  | 50996   | 31937   |
| <b>Hydrogenophaga</b>          | 47746  | 51325   | 46694  | 85918   | 24161  | 28232  | 62556   | 42989   |
| <b>Melaminivora</b>            | 46265  | 47921   | 62281  | 73121   | 18549  | 21990  | 46336   | 35583   |
| <b>Rhodoferax</b>              | 35159  | 50962   | 28713  | 96087   | 25980  | 25708  | 70217   | 51570   |
| <b>Polaromonas</b>             | 28206  | 39704   | 23669  | 70164   | 19613  | 19650  | 52955   | 45421   |
| <b>Ramlibacter</b>             | 22453  | 25050   | 17008  | 36844   | 12243  | 11749  | 28907   | 14923   |
| <b>Simplicispira</b>           | 14768  | 17877   | 14635  | 32410   | 6927   | 10731  | 21101   | 27093   |
| <b>Verminephrobacter</b>       | 13542  | 13904   | 12296  | 26675   | 5710   | 9183   | 19784   | 16459   |
| <b>Serpentinomonas</b>         | 11585  | 9354    | 9652   | 17361   | 5451   | 6499   | 11469   | 11033   |
| <b>Limnohabitans</b>           | 9520   | 11031   | 8650   | 23975   | 5083   | 7533   | 16447   | 15870   |
| <b>Curvibacter</b>             | 6585   | 8347    | 6429   | 16253   | 3667   | 4901   | 10954   | 10385   |
| <b>Diaphorobacter</b>          | 5666   | 5806    | 13122  | 14256   | 2453   | 3307   | 5872    | 4802    |
| <b>Candidatus Symbiobacter</b> | 1665   | 1232    | 1191   | 2100    | 530    | 1082   | 1602    | 1832    |
| <b>Burkholderia</b>            | 86269  | 68978   | 41345  | 84613   | 42003  | 53193  | 60221   | 34190   |
| <b>Cupriavidus</b>             | 74739  | 62019   | 43885  | 64067   | 59721  | 72060  | 60302   | 29694   |
| <b>Ralstonia</b>               | 27680  | 22537   | 18240  | 31573   | 11900  | 14772  | 24697   | 14416   |
| <b>Paraburkholderia</b>        | 18625  | 18710   | 11564  | 21047   | 11389  | 12114  | 15724   | 11813   |
| <b>Pandoraea</b>               | 17646  | 17268   | 10561  | 17358   | 7997   | 9628   | 14802   | 10213   |
| <b>Lautropia</b>               | 1893   | 1507    | 1153   | 2128    | 2765   | 1385   | 2437    | 1041    |
| <b>Polynucleobacter</b>        | 1856   | 2107    | 3806   | 1826    | 644    | 1708   | 1931    | 4809    |
| <b>Hydromonas</b>              | 382    | 236     | 240    | 351     | 85     | 208    | 294     | 41656   |

|                          |       |        |       |         |        |       |        |        |
|--------------------------|-------|--------|-------|---------|--------|-------|--------|--------|
| <b>Mycoavidus</b>        | 182   | 101    | 131   | 197     | 44     | 102   | 177    | 279    |
| <b>Methylibium</b>       | 12238 | 9457   | 6402  | 10953   | 6521   | 4836  | 8626   | 3811   |
| <b>Thiomonas</b>         | 10829 | 8475   | 6966  | 14336   | 4045   | 7592  | 9513   | 10374  |
| <b>Rubrivivax</b>        | 9960  | 7764   | 6608  | 8618    | 6275   | 4087  | 6543   | 2680   |
| <b>Rhizobacter</b>       | 8551  | 7061   | 4261  | 8484    | 4894   | 3733  | 6753   | 3338   |
| <b>Leptothrix</b>        | 8375  | 7499   | 5134  | 9210    | 4965   | 3902  | 7113   | 4043   |
| <b>Aquabacterium</b>     | 6961  | 5728   | 3541  | 8070    | 4700   | 3179  | 4826   | 3619   |
| <b>Mitsuaria</b>         | 6388  | 4955   | 2968  | 5577    | 3202   | 2490  | 4275   | 1913   |
| <b>Paucibacter</b>       | 4447  | 5416   | 3154  | 5916    | 2127   | 2856  | 5399   | 4152   |
| <b>Roseateles</b>        | 4059  | 3801   | 2389  | 5367    | 2231   | 2019  | 3709   | 2361   |
| <b>Achromobacter</b>     | 33403 | 30773  | 22674 | 40314   | 17138  | 17419 | 29834  | 22627  |
| <b>Bordetella</b>        | 31927 | 29465  | 24133 | 41870   | 15775  | 19656 | 28811  | 20678  |
| <b>Pigmentiphaga</b>     | 3291  | 2899   | 2447  | 3536    | 1544   | 1597  | 2561   | 1540   |
| <b>Alcaligenes</b>       | 3125  | 3647   | 3782  | 9841    | 1441   | 2538  | 3439   | 5709   |
| <b>Castellaniella</b>    | 2898  | 2095   | 1958  | 2896    | 1113   | 1275  | 2036   | 1191   |
| <b>Orrella</b>           | 2370  | 2103   | 1564  | 2974    | 1203   | 1464  | 2228   | 1393   |
| <b>Pusillimonas</b>      | 1357  | 1094   | 876   | 1625    | 568    | 841   | 1215   | 1465   |
| <b>Advenella</b>         | 949   | 846    | 1403  | 1059    | 433    | 645   | 894    | 1496   |
| <b>Oligella</b>          | 336   | 142    | 645   | 124     | 88     | 129   | 142    | 433    |
| <b>Taylorella</b>        | 192   | 165    | 161   | 78      | 43     | 202   | 105    | 288    |
| <b>Paenalcaligenes</b>   | 122   | 94     | 73    | 112     | 30     | 75    | 84     | 446    |
| <b>Basilea</b>           | 117   | 98     | 254   | 45      | 59     | 131   | 103    | 425    |
| <b>Massilia</b>          | 25884 | 138986 | 30106 | 281865  | 53527  | 27453 | 121951 | 17248  |
| <b>Janthinobacterium</b> | 17401 | 49221  | 35649 | 1237082 | 159598 | 23175 | 45713  | 429464 |
| <b>Herbaspirillum</b>    | 9875  | 11723  | 7114  | 18094   | 5861   | 5898  | 11445  | 7469   |
| <b>Collimonas</b>        | 5441  | 6990   | 4823  | 11269   | 3538   | 3766  | 7321   | 5883   |
| <b>Oxalobacter</b>       | 1228  | 761    | 274   | 243     | 155    | 687   | 581    | 383    |
| <b>Herminiimonas</b>     | 1099  | 1268   | 767   | 1976    | 639    | 751   | 1171   | 1542   |
| <b>Undibacterium</b>     | 608   | 547    | 417   | 891     | 253    | 377   | 652    | 969    |
| <b>Sutterella</b>        | 1538  | 2256   | 569   | 559     | 415    | 2057  | 688    | 297    |
| <b>Thauera</b>           | 42137 | 22057  | 47484 | 33662   | 9912   | 12682 | 16811  | 18759  |
| <b>Azoarcus</b>          | 29849 | 17111  | 14502 | 21463   | 8760   | 11544 | 14085  | 12237  |
| <b>Dechloromonas</b>     | 29222 | 13267  | 2884  | 7081    | 7560   | 4746  | 5052   | 9515   |
| <b>Azospira</b>          | 12307 | 5084   | 2629  | 5880    | 7629   | 5475  | 4428   | 2457   |
| <b>Aromatoleum</b>       | 3524  | 1964   | 1914  | 2613    | 1044   | 1428  | 1554   | 1485   |
| <b>Aquaspirillum</b>     | 11046 | 3379   | 1552  | 6540    | 9857   | 5467  | 6044   | 3984   |
| <b>Chromobacterium</b>   | 8288  | 6231   | 4580  | 7663    | 4071   | 4945  | 5606   | 4707   |
| <b>Iodobacter</b>        | 216   | 160    | 747   | 123     | 110    | 128   | 134    | 471    |
| <b>Laribacter</b>        | 3138  | 1690   | 1239  | 3134    | 885    | 1924  | 2639   | 1836   |
| <b>Jeongeupia</b>        | 2315  | 1377   | 1008  | 1863    | 788    | 1015  | 1259   | 865    |

|                                         |        |        |        |        |        |        |        |       |
|-----------------------------------------|--------|--------|--------|--------|--------|--------|--------|-------|
| <b>Aquitalea</b>                        | 2250   | 1395   | 810    | 1376   | 791    | 965    | 1337   | 1428  |
| <b>Pseudogulbenkiania</b>               | 1876   | 1207   | 828    | 1536   | 802    | 909    | 1217   | 930   |
| <b>Vogesella</b>                        | 1772   | 1302   | 947    | 1728   | 803    | 1061   | 1305   | 1189  |
| <b>Microvirgula</b>                     | 1650   | 6038   | 743    | 2344   | 906    | 8861   | 1670   | 1802  |
| <b>Neisseria</b>                        | 6275   | 4674   | 3852   | 3839   | 2486   | 4828   | 5731   | 48488 |
| <b>Vitreoscilla</b>                     | 3527   | 2333   | 2160   | 3681   | 1243   | 2165   | 3334   | 14739 |
| <b>Crenobacter</b>                      | 1560   | 1017   | 672    | 1135   | 621    | 674    | 829    | 600   |
| <b>Eikenella</b>                        | 848    | 465    | 736    | 532    | 229    | 731    | 427    | 4118  |
| <b>Kingella</b>                         | 203    | 113    | 77     | 96     | 46     | 177    | 98     | 1385  |
| <b>Snodgrassella</b>                    | 187    | 135    | 94     | 133    | 63     | 169    | 205    | 559   |
| <b>Simonsiella</b>                      | 97     | 144    | 67     | 55     | 23     | 72     | 103    | 721   |
| <b>Sulfuritalea</b>                     | 3108   | 2323   | 1215   | 1708   | 1092   | 1078   | 1236   | 1615  |
| <b>Methyloversatilis</b>                | 2597   | 1666   | 1109   | 1846   | 959    | 1027   | 1286   | 1130  |
| <b>Nitrosomonas</b>                     | 3309   | 2289   | 3318   | 2355   | 997    | 2164   | 2837   | 2159  |
| <b>Nitrosospira</b>                     | 1659   | 1061   | 1149   | 1277   | 418    | 1524   | 2772   | 1007  |
| <b>Sulfuritortus</b>                    | 3346   | 1708   | 1141   | 2736   | 827    | 1473   | 1572   | 743   |
| <b>Thiobacillus</b>                     | 1545   | 1423   | 789    | 1117   | 550    | 719    | 800    | 582   |
| <b>Sideroxydans</b>                     | 967    | 671    | 399    | 664    | 360    | 525    | 523    | 529   |
| <b>Sulfuriferula</b>                    | 964    | 638    | 402    | 1042   | 285    | 905    | 1895   | 1553  |
| <b>Sulfuricella</b>                     | 765    | 559    | 307    | 514    | 259    | 456    | 411    | 530   |
| <b>Gallionella</b>                      | 685    | 469    | 406    | 738    | 216    | 479    | 470    | 683   |
| <b>Ferriphaselus</b>                    | 612    | 446    | 298    | 475    | 265    | 385    | 334    | 518   |
| <b>Methylovorus</b>                     | 799    | 563    | 504    | 791    | 281    | 539    | 582    | 811   |
| <b>Methylobacillus</b>                  | 710    | 605    | 367    | 678    | 252    | 492    | 493    | 475   |
| <b>Methylotenera</b>                    | 253    | 252    | 752    | 171    | 86     | 252    | 329    | 1021  |
| <b>Candidatus Methylopumilus</b>        | 221    | 161    | 254    | 131    | 116    | 198    | 160    | 617   |
| <b>Methylophilus</b>                    | 205    | 176    | 120    | 145    | 71     | 137    | 121    | 330   |
| <b>Candidatus Accumulibacter</b>        | 4572   | 2693   | 1343   | 2811   | 1597   | 1747   | 1990   | 2740  |
| <b>Candidatus Kinetoplastibacterium</b> | 250    | 171    | 363    | 104    | 143    | 233    | 219    | 272   |
| <b>Candidatus Profftella</b>            | 35     | 34     | 5      | 12     | 5      | 34     | 13     | 32    |
| <b>Candidatus Tremblaya</b>             | 21     | 1      | 1      | 0      | 0      | 2      | 2      | 3     |
| <b>Candidatus Nasuia</b>                | 6      | 5      | 0      | 1      | 0      | 1      | 1      | 9     |
| <b>Sphingopyxis</b>                     | 449715 | 478936 | 241500 | 311381 | 201253 | 261738 | 276576 | 52743 |
| <b>Sphingobium</b>                      | 182771 | 127888 | 44622  | 66615  | 53582  | 74606  | 66456  | 14898 |
| <b>Sphingomonas</b>                     | 135456 | 140573 | 71474  | 93070  | 75580  | 69807  | 77493  | 15133 |
| <b>Novosphingobium</b>                  | 45116  | 37791  | 27249  | 36756  | 22324  | 23940  | 21569  | 7602  |
| <b>Blastomonas</b>                      | 26400  | 10666  | 6427   | 8594   | 17658  | 9709   | 14404  | 2262  |
| <b>Sphingosinicella</b>                 | 6445   | 6593   | 3260   | 4921   | 3417   | 3532   | 3785   | 1213  |
| <b>Sphingorhabdus</b>                   | 5816   | 4082   | 2843   | 3217   | 2415   | 3004   | 3894   | 1160  |
| <b>Rhizorhabdus</b>                     | 5455   | 5275   | 3169   | 3755   | 2909   | 3007   | 3190   | 756   |

|                           |        |        |        |        |        |       |        |       |
|---------------------------|--------|--------|--------|--------|--------|-------|--------|-------|
| <b>Citromicrobium</b>     | 2151   | 1893   | 1340   | 1332   | 1048   | 1162  | 1272   | 425   |
| <b>Zymomonas</b>          | 598    | 619    | 791    | 1531   | 276    | 585   | 556    | 314   |
| <b>Altererythrobacter</b> | 15848  | 14047  | 11553  | 11652  | 7349   | 8373  | 8835   | 3421  |
| <b>Erythrobacter</b>      | 15497  | 12834  | 9935   | 11295  | 7595   | 8438  | 8576   | 3375  |
| <b>Porphyrobacter</b>     | 11769  | 8047   | 6488   | 7027   | 5584   | 5630  | 5315   | 2370  |
| <b>Croceicoccus</b>       | 6647   | 5160   | 4024   | 4618   | 2608   | 3295  | 3305   | 1220  |
| <b>Rhizobium</b>          | 107812 | 69086  | 53894  | 176433 | 61446  | 50908 | 56575  | 22551 |
| <b>Agrobacterium</b>      | 49369  | 31409  | 20133  | 65226  | 22198  | 34265 | 60888  | 16859 |
| <b>Neorhizobium</b>       | 13246  | 8752   | 7506   | 25210  | 8578   | 6600  | 7773   | 3695  |
| <b>Sinorhizobium</b>      | 78499  | 62633  | 38566  | 240200 | 45667  | 55303 | 64386  | 15567 |
| <b>Ensifer</b>            | 30756  | 18876  | 14701  | 73892  | 25193  | 36418 | 24042  | 4043  |
| <b>Shinella</b>           | 71676  | 51318  | 51765  | 301418 | 46739  | 43017 | 49971  | 11111 |
| <b>Liberibacter</b>       | 306    | 208    | 110    | 241    | 277    | 250   | 302    | 263   |
| <b>Bosea</b>              | 133744 | 115627 | 104354 | 325463 | 230968 | 67955 | 106940 | 21617 |
| <b>Bradyrhizobium</b>     | 82499  | 75080  | 41065  | 85966  | 102791 | 49578 | 60862  | 17218 |
| <b>Rhodopseudomonas</b>   | 23070  | 16265  | 9575   | 22741  | 21169  | 10662 | 12913  | 4626  |
| <b>Nitrobacter</b>        | 4157   | 4051   | 1927   | 6883   | 5204   | 2265  | 3535   | 953   |
| <b>Oligotropha</b>        | 3505   | 3285   | 1651   | 3644   | 4836   | 1675  | 2439   | 615   |
| <b>Afipia</b>             | 2296   | 2113   | 876    | 2240   | 3115   | 1137  | 1794   | 702   |
| <b>Variibacter</b>        | 1656   | 1425   | 884    | 2016   | 1773   | 927   | 1177   | 392   |
| <b>Mesorhizobium</b>      | 66158  | 51062  | 29743  | 96259  | 50310  | 30963 | 41958  | 14066 |
| <b>Aminobacter</b>        | 16839  | 16089  | 7622   | 36977  | 14752  | 9372  | 13352  | 3587  |
| <b>Hoeflea</b>            | 2366   | 1627   | 1256   | 3334   | 1435   | 1333  | 1555   | 801   |
| <b>Chelativorans</b>      | 2362   | 2198   | 1592   | 5072   | 1894   | 1424  | 1805   | 689   |
| <b>Nitratireductor</b>    | 2336   | 1803   | 1539   | 3260   | 1498   | 1594  | 1527   | 750   |
| <b>Phyllobacterium</b>    | 1580   | 1133   | 789    | 2590   | 1048   | 889   | 961    | 424   |
| <b>Methylobacterium</b>   | 42643  | 40436  | 20972  | 55474  | 50859  | 21989 | 24989  | 7120  |
| <b>Methylorubrum</b>      | 8385   | 7590   | 4506   | 11893  | 7908   | 5231  | 5579   | 1781  |
| <b>Microvirga</b>         | 5008   | 4185   | 2657   | 7085   | 4398   | 3000  | 3146   | 1100  |
| <b>Devosia</b>            | 10889  | 9364   | 8009   | 13423  | 8654   | 5631  | 5727   | 2981  |
| <b>Hyphomicrobium</b>     | 5334   | 4206   | 2442   | 4628   | 9439   | 3466  | 3691   | 1195  |
| <b>Blastochloris</b>      | 4243   | 3437   | 2519   | 7915   | 3368   | 3230  | 2578   | 997   |
| <b>Rhodoplanes</b>        | 2491   | 2071   | 1579   | 3245   | 2323   | 1419  | 1598   | 708   |
| <b>Pelagibacterium</b>    | 1033   | 818    | 784    | 1532   | 680    | 679   | 651    | 378   |
| <b>Rhodomicrobium</b>     | 1031   | 793    | 526    | 1278   | 620    | 654   | 570    | 252   |
| <b>Filomicrobium</b>      | 362    | 311    | 184    | 382    | 251    | 286   | 170    | 112   |
| <b>Maritalea</b>          | 282    | 248    | 216    | 278    | 122    | 246   | 212    | 290   |
| <b>Xanthobacter</b>       | 8412   | 7408   | 2705   | 8144   | 7972   | 4740  | 3836   | 2277  |
| <b>Azorhizobium</b>       | 4707   | 3746   | 2157   | 6055   | 5414   | 3045  | 2971   | 829   |
| <b>Starkeya</b>           | 3872   | 3624   | 1937   | 6271   | 3651   | 2778  | 2442   | 911   |

|                                     |        |       |       |        |       |       |        |       |
|-------------------------------------|--------|-------|-------|--------|-------|-------|--------|-------|
| <b>Pseudolabrys</b>                 | 2423   | 1941  | 1445  | 3135   | 2270  | 1315  | 1532   | 651   |
| <b>Pleomorphomonas</b>              | 5915   | 3686  | 3423  | 23954  | 3293  | 4761  | 3498   | 1092  |
| <b>Methylocystis</b>                | 4089   | 3014  | 2024  | 3680   | 3600  | 2192  | 2166   | 900   |
| <b>Methylosinus</b>                 | 2112   | 1692  | 1132  | 2538   | 2166  | 1321  | 1192   | 479   |
| <b>Ochrobactrum</b>                 | 8866   | 5680  | 5135  | 20738  | 3647  | 8437  | 5398   | 7359  |
| <b>Brucella</b>                     | 2237   | 1774  | 1474  | 3628   | 1483  | 1440  | 1431   | 904   |
| <b>Martelella</b>                   | 7519   | 4863  | 4783  | 12724  | 4363  | 4587  | 4720   | 1994  |
| <b>Aureimonas</b>                   | 2518   | 1968  | 1334  | 3937   | 1719  | 1540  | 1503   | 538   |
| <b>Hartmannibacter</b>              | 3075   | 2379  | 1664  | 7954   | 2382  | 2316  | 2239   | 737   |
| <b>Pseudorhodoplanes</b>            | 1854   | 1752  | 1733  | 2220   | 1956  | 1109  | 1272   | 529   |
| <b>Methyloceanibacter</b>           | 1330   | 1085  | 660   | 1568   | 875   | 910   | 827    | 345   |
| <b>Chelatococcus</b>                | 6021   | 4801  | 3441  | 9596   | 6243  | 3487  | 3947   | 1225  |
| <b>Methylocella</b>                 | 1407   | 1495  | 755   | 1668   | 1362  | 939   | 865    | 352   |
| <b>Methylovirgula</b>               | 1246   | 1051  | 529   | 1215   | 1143  | 749   | 749    | 327   |
| <b>Beijerinckia</b>                 | 853    | 955   | 419   | 841    | 890   | 605   | 598    | 317   |
| <b>Parvibaculum</b>                 | 1568   | 1768  | 1175  | 1809   | 952   | 989   | 1025   | 1084  |
| <b>Anderseniella</b>                | 646    | 431   | 275   | 549    | 401   | 408   | 331    | 303   |
| <b>Candidatus Phaeomarinobacter</b> | 452    | 342   | 556   | 464    | 258   | 313   | 249    | 198   |
| <b>Breoghania</b>                   | 2016   | 1445  | 1136  | 3259   | 1295  | 1388  | 1118   | 509   |
| <b>Cohaesibacter</b>                | 655    | 484   | 349   | 835    | 380   | 611   | 381    | 272   |
| <b>Bartonella</b>                   | 1405   | 1016  | 580   | 841    | 448   | 1330  | 1245   | 1384  |
| <b>Paracoccus</b>                   | 159716 | 93309 | 64487 | 114550 | 33489 | 84812 | 150593 | 30223 |
| <b>Rhodobacter</b>                  | 33255  | 15044 | 27048 | 24724  | 9567  | 14330 | 17775  | 10601 |
| <b>Pannonibacter</b>                | 15673  | 11545 | 7165  | 18879  | 7404  | 8015  | 10309  | 1805  |
| <b>Defluviimonas</b>                | 7840   | 5051  | 6790  | 6517   | 2855  | 3685  | 5897   | 1985  |
| <b>Celeribacter</b>                 | 7401   | 4767  | 4967  | 6472   | 2930  | 4137  | 5301   | 2570  |
| <b>Rhodovulum</b>                   | 6602   | 4331  | 4336  | 5885   | 2319  | 3789  | 4371   | 2126  |
| <b>Sulfitobacter</b>                | 6382   | 3679  | 4912  | 4693   | 2209  | 3370  | 3987   | 3102  |
| <b>Tabrizicola</b>                  | 6339   | 2908  | 4751  | 4110   | 1479  | 1940  | 3092   | 3836  |
| <b>Phaeobacter</b>                  | 5243   | 2959  | 4600  | 4074   | 1856  | 2968  | 3460   | 2603  |
| <b>Gemmobacter</b>                  | 4140   | 1762  | 3891  | 2730   | 1100  | 1450  | 2444   | 2946  |
| <b>Yangia</b>                       | 4128   | 2640  | 2682  | 3880   | 1698  | 2472  | 2886   | 1421  |
| <b>Ruegeria</b>                     | 3226   | 1911  | 2642  | 2327   | 1102  | 1628  | 2058   | 1435  |
| <b>Thalassococcus</b>               | 2963   | 1658  | 2157  | 2330   | 1140  | 1417  | 1831   | 1079  |
| <b>Ketogulonicigenium</b>           | 2465   | 1515  | 2105  | 2001   | 823   | 1544  | 1926   | 1000  |
| <b>Labrenzia</b>                    | 2400   | 1629  | 1889  | 3139   | 1313  | 1469  | 1538   | 881   |
| <b>Sagittula</b>                    | 2277   | 1454  | 1398  | 2148   | 794   | 1206  | 1314   | 707   |
| <b>Pelagibaca</b>                   | 2245   | 1377  | 1583  | 2202   | 965   | 1247  | 1564   | 859   |
| <b>Salipiger</b>                    | 2237   | 1484  | 1377  | 2385   | 1030  | 1298  | 1444   | 627   |
| <b>Leisingera</b>                   | 2223   | 1280  | 1662  | 1835   | 896   | 1170  | 1512   | 1016  |

|                            |        |        |        |        |        |       |       |       |
|----------------------------|--------|--------|--------|--------|--------|-------|-------|-------|
| <b>Confluentimicrobium</b> | 2152   | 1105   | 1640   | 1832   | 637    | 986   | 1285  | 868   |
| <b>Thioclava</b>           | 2150   | 1073   | 1450   | 1902   | 735    | 1194  | 1373  | 685   |
| <b>Marinovum</b>           | 2105   | 1315   | 1769   | 1990   | 853    | 1206  | 1533  | 774   |
| <b>Dinoroseobacter</b>     | 1689   | 951    | 1167   | 1240   | 659    | 747   | 947   | 588   |
| <b>Brevirhabdus</b>        | 1664   | 934    | 1081   | 1140   | 612    | 700   | 890   | 505   |
| <b>Yoonia</b>              | 1599   | 717    | 1197   | 1151   | 536    | 735   | 1026  | 656   |
| <b>Roseibacterium</b>      | 1587   | 1588   | 1084   | 1390   | 603    | 975   | 1151  | 520   |
| <b>Silicimonas</b>         | 1547   | 1004   | 1055   | 1401   | 701    | 794   | 1009  | 480   |
| <b>Roseovarius</b>         | 1367   | 777    | 1104   | 1040   | 463    | 681   | 878   | 667   |
| <b>Stappia</b>             | 1230   | 1030   | 766    | 2118   | 818    | 889   | 847   | 391   |
| <b>Antarctobacter</b>      | 1159   | 659    | 787    | 960    | 396    | 667   | 785   | 542   |
| <b>Epibacterium</b>        | 1142   | 684    | 763    | 813    | 398    | 616   | 702   | 525   |
| <b>Octadecabacter</b>      | 1071   | 610    | 983    | 845    | 341    | 569   | 744   | 685   |
| <b>Roseobacter</b>         | 1051   | 865    | 706    | 756    | 443    | 573   | 851   | 522   |
| <b>Tateyamaria</b>         | 951    | 525    | 659    | 721    | 365    | 447   | 476   | 369   |
| <b>Rhodobaca</b>           | 920    | 584    | 722    | 735    | 303    | 467   | 718   | 613   |
| <b>Jannaschia</b>          | 801    | 417    | 628    | 637    | 336    | 436   | 493   | 348   |
| <b>Sedimentitalea</b>      | 435    | 305    | 393    | 323    | 162    | 296   | 331   | 282   |
| <b>Pseudovibrio</b>        | 362    | 276    | 306    | 415    | 223    | 339   | 266   | 238   |
| <b>Halocynthiibacter</b>   | 312    | 144    | 212    | 190    | 131    | 149   | 167   | 169   |
| <b>Marivivens</b>          | 289    | 400    | 197    | 275    | 148    | 147   | 286   | 164   |
| <b>Hyphomonas</b>          | 1887   | 1809   | 1162   | 1611   | 1026   | 1187  | 1177  | 624   |
| <b>Glycocalis</b>          | 800    | 672    | 360    | 675    | 337    | 524   | 459   | 258   |
| <b>Maricaulis</b>          | 591    | 584    | 378    | 720    | 310    | 439   | 347   | 188   |
| <b>Hirschia</b>            | 125    | 101    | 168    | 59     | 29     | 109   | 63    | 118   |
| <b>Brevundimonas</b>       | 158265 | 313413 | 217941 | 283348 | 111888 | 66683 | 81594 | 44327 |
| <b>Caulobacter</b>         | 42663  | 58210  | 17729  | 36679  | 28130  | 20476 | 25436 | 9836  |
| <b>Phenylobacterium</b>    | 7126   | 10638  | 4077   | 7211   | 7515   | 3865  | 5688  | 2481  |
| <b>Asticcacaulis</b>       | 1742   | 1936   | 1268   | 1628   | 919    | 1134  | 1116  | 596   |
| <b>Azospirillum</b>        | 19924  | 15906  | 11027  | 21841  | 11494  | 12629 | 12323 | 5611  |
| <b>Magnetospirillum</b>    | 7193   | 5003   | 3614   | 6576   | 3846   | 4648  | 4012  | 1941  |
| <b>Rhodospirillum</b>      | 2972   | 2556   | 1801   | 3578   | 1809   | 2123  | 2106  | 913   |
| <b>Tistrella</b>           | 2471   | 2048   | 1470   | 2794   | 1451   | 1463  | 1666  | 714   |
| <b>Nitrospirillum</b>      | 2434   | 2410   | 1402   | 3150   | 1638   | 2152  | 1657  | 735   |
| <b>Niveispirillum</b>      | 2000   | 2806   | 1161   | 2081   | 1885   | 1361  | 1343  | 629   |
| <b>Thalassospira</b>       | 1836   | 1514   | 1238   | 1612   | 769    | 1333  | 1211  | 835   |
| <b>Indioceanicola</b>      | 1311   | 1222   | 776    | 1262   | 837    | 976   | 877   | 431   |
| <b>Pararhodospirillum</b>  | 934    | 779    | 592    | 1269   | 787    | 737   | 617   | 345   |
| <b>Magnetospira</b>        | 471    | 374    | 279    | 549    | 255    | 356   | 282   | 191   |
| <b>Haematospirillum</b>    | 163    | 126    | 87     | 168    | 77     | 144   | 96    | 70    |

|                                   |       |       |       |       |       |       |       |      |
|-----------------------------------|-------|-------|-------|-------|-------|-------|-------|------|
| <b>Candidatus Endolissoclinu</b>  | 74    | 88    | 106   | 36    | 29    | 64    | 55    | 82   |
| <b>Roseomonas</b>                 | 9933  | 6795  | 5249  | 10634 | 6549  | 5158  | 6985  | 2779 |
| <b>Komagataeibacter</b>           | 3793  | 3118  | 2631  | 3800  | 1861  | 3178  | 2542  | 1390 |
| <b>Acetobacter</b>                | 2205  | 1852  | 1615  | 2350  | 1081  | 2594  | 1724  | 1340 |
| <b>Acidiphilium</b>               | 1957  | 1574  | 1283  | 2201  | 1272  | 1088  | 1221  | 541  |
| <b>Acidisphaera</b>               | 1395  | 1128  | 959   | 1417  | 848   | 788   | 869   | 324  |
| <b>Gluconacetobacter</b>          | 1233  | 1122  | 820   | 1359  | 686   | 1486  | 843   | 353  |
| <b>Granulibacter</b>              | 1174  | 943   | 714   | 1135  | 584   | 824   | 690   | 381  |
| <b>Gluconobacter</b>              | 1099  | 1012  | 633   | 983   | 579   | 1039  | 652   | 477  |
| <b>Kozakia</b>                    | 509   | 337   | 291   | 441   | 223   | 378   | 267   | 226  |
| <b>Neoasaia</b>                   | 490   | 405   | 277   | 391   | 212   | 417   | 261   | 140  |
| <b>Asaia</b>                      | 236   | 205   | 219   | 226   | 103   | 250   | 155   | 146  |
| <b>Parasaccharibacter</b>         | 217   | 174   | 95    | 141   | 70    | 214   | 85    | 80   |
| <b>Commensalibacter</b>           | 72    | 62    | 27    | 15    | 23    | 89    | 40    | 71   |
| <b>Polymorphum</b>                | 3068  | 1872  | 1660  | 5617  | 1705  | 1847  | 1905  | 669  |
| <b>Phreatobacter</b>              | 2761  | 2527  | 2755  | 4110  | 2952  | 1689  | 1723  | 665  |
| <b>Micavibrio</b>                 | 655   | 588   | 825   | 596   | 262   | 509   | 481   | 292  |
| <b>Candidatus Puniceispirillu</b> | 159   | 109   | 109   | 86    | 50    | 128   | 79    | 101  |
| <b>Rickettsia</b>                 | 670   | 464   | 256   | 263   | 160   | 639   | 579   | 430  |
| <b>Orientia</b>                   | 92    | 91    | 148   | 43    | 42    | 85    | 60    | 65   |
| <b>Candidatus Phycoricketts</b>   | 67    | 55    | 36    | 35    | 14    | 65    | 38    | 29   |
| <b>Wolbachia</b>                  | 308   | 184   | 213   | 108   | 74    | 249   | 282   | 239  |
| <b>Ehrlichia</b>                  | 192   | 135   | 63    | 91    | 39    | 221   | 144   | 214  |
| <b>Anaplasma</b>                  | 87    | 74    | 31    | 16    | 20    | 111   | 48    | 54   |
| <b>Neorickettsia</b>              | 67    | 44    | 21    | 56    | 7     | 51    | 29    | 29   |
| <b>Candidatus Midichloria</b>     | 35    | 48    | 8     | 41    | 10    | 34    | 19    | 23   |
| <b>Candidatus Fokinia</b>         | 28    | 17    | 9     | 6     | 6     | 9     | 9     | 6    |
| <b>Candidatus Pelagibacter</b>    | 326   | 320   | 111   | 183   | 91    | 266   | 598   | 419  |
| <b>Candidatus Fonsibacter</b>     | 117   | 153   | 27    | 65    | 74    | 125   | 86    | 553  |
| <b>Magnetococcus</b>              | 293   | 181   | 156   | 141   | 61    | 281   | 161   | 176  |
| <b>Parvularcula</b>               | 271   | 193   | 116   | 201   | 139   | 188   | 130   | 103  |
| <b>Candidatus Nucleicultrix</b>   | 110   | 47    | 21    | 58    | 35    | 59    | 45    | 98   |
| <b>Candidatus Paracaedibac</b>    | 100   | 76    | 330   | 63    | 36    | 63    | 51    | 53   |
| <b>Desulfovibrio</b>              | 72801 | 20786 | 11924 | 17251 | 13481 | 33480 | 37447 | 5855 |
| <b>Pseudodesulfovibrio</b>        | 2329  | 1608  | 999   | 1150  | 757   | 2465  | 1308  | 707  |
| <b>Lawsonia</b>                   | 129   | 67    | 30    | 20    | 26    | 172   | 59    | 72   |
| <b>Desulfomicrobium</b>           | 1496  | 903   | 573   | 782   | 368   | 1485  | 782   | 819  |
| <b>Desulfohalobium</b>            | 208   | 169   | 79    | 177   | 68    | 183   | 124   | 58   |
| <b>Myxococcus</b>                 | 5382  | 5084  | 3697  | 4458  | 42988 | 4210  | 3651  | 1888 |
| <b>Corallococcus</b>              | 1741  | 1640  | 1015  | 1452  | 1106  | 1472  | 1190  | 652  |

|                                  |       |      |      |      |      |       |       |        |
|----------------------------------|-------|------|------|------|------|-------|-------|--------|
| <b>Archangium</b>                | 1346  | 1280 | 1016 | 1357 | 729  | 1061  | 951   | 431    |
| <b>Cystobacter</b>               | 1244  | 1191 | 736  | 1199 | 723  | 886   | 819   | 453    |
| <b>Stigmatella</b>               | 955   | 915  | 577  | 879  | 579  | 740   | 659   | 412    |
| <b>Melittangium</b>              | 854   | 829  | 518  | 720  | 446  | 724   | 592   | 322    |
| <b>Anaeromyxobacter</b>          | 3716  | 3575 | 2618 | 2770 | 1762 | 3081  | 2294  | 986    |
| <b>Vulgatibacter</b>             | 724   | 585  | 396  | 538  | 292  | 537   | 444   | 245    |
| <b>Sorangium</b>                 | 6417  | 6079 | 4459 | 5727 | 3373 | 4436  | 4319  | 1842   |
| <b>Chondromyces</b>              | 1018  | 1060 | 773  | 1021 | 521  | 850   | 750   | 334    |
| <b>Pajaroellobacter</b>          | 30    | 30   | 16   | 24   | 8    | 31    | 11    | 21     |
| <b>Sandaracinus</b>              | 1588  | 1538 | 1134 | 1202 | 819  | 1083  | 1013  | 381    |
| <b>Haliangium</b>                | 1627  | 1570 | 1088 | 1563 | 828  | 1258  | 1143  | 730    |
| <b>Geobacter</b>                 | 6789  | 4901 | 3085 | 3761 | 2237 | 6653  | 3494  | 1898   |
| <b>Geoalkalibacter</b>           | 553   | 354  | 243  | 263  | 146  | 573   | 251   | 179    |
| <b>Pelobacter</b>                | 1882  | 1407 | 881  | 866  | 574  | 2070  | 990   | 750    |
| <b>Desulfuromonas</b>            | 1255  | 1450 | 818  | 758  | 508  | 1317  | 904   | 539    |
| <b>Desulfococcus</b>             | 925   | 686  | 496  | 574  | 287  | 867   | 473   | 327    |
| <b>Desulfobacter</b>             | 508   | 299  | 636  | 145  | 166  | 607   | 307   | 225    |
| <b>Desulfatibacillum</b>         | 462   | 296  | 183  | 177  | 123  | 446   | 254   | 162    |
| <b>Desulfobacula</b>             | 247   | 210  | 228  | 98   | 83   | 354   | 193   | 112    |
| <b>Desulfobacterium</b>          | 194   | 178  | 124  | 81   | 60   | 234   | 93    | 123    |
| <b>Desulfobulbus</b>             | 726   | 454  | 251  | 318  | 174  | 550   | 414   | 154    |
| <b>Desulfurivibrio</b>           | 463   | 413  | 260  | 492  | 242  | 547   | 474   | 263    |
| <b>Desulfotalea</b>              | 250   | 363  | 98   | 675  | 107  | 510   | 547   | 196    |
| <b>Desulfocapsa</b>              | 159   | 180  | 106  | 122  | 48   | 177   | 350   | 65     |
| <b>Syntrophus</b>                | 256   | 181  | 119  | 86   | 85   | 246   | 113   | 71     |
| <b>Desulfomonile</b>             | 228   | 194  | 108  | 92   | 68   | 276   | 193   | 135    |
| <b>Desulfobacca</b>              | 150   | 123  | 97   | 54   | 53   | 145   | 86    | 124    |
| <b>Syntrophobacter</b>           | 452   | 316  | 250  | 241  | 166  | 464   | 212   | 168    |
| <b>Desulfarculus</b>             | 1037  | 732  | 483  | 668  | 345  | 1005  | 532   | 337    |
| <b>Bradymonas</b>                | 488   | 412  | 285  | 368  | 166  | 423   | 301   | 131    |
| <b>Desulfurella</b>              | 104   | 86   | 35   | 35   | 25   | 108   | 66    | 66     |
| <b>Hippea</b>                    | 93    | 78   | 35   | 25   | 17   | 104   | 113   | 31     |
| <b>Candidatus Desulfofervidu</b> | 121   | 67   | 80   | 48   | 31   | 90    | 97    | 55     |
| <b>Arcobacter</b>                | 16301 | 3525 | 4144 | 4532 | 7171 | 5125  | 11221 | 358481 |
| <b>Aliiarcobacter</b>            | 227   | 80   | 54   | 68   | 88   | 120   | 146   | 3252   |
| <b>Campylobacter</b>             | 9209  | 5364 | 4466 | 2735 | 2028 | 14133 | 6578  | 4816   |
| <b>Sulfurospirillum</b>          | 1726  | 1168 | 719  | 1422 | 2685 | 1566  | 1477  | 2302   |
| <b>Helicobacter</b>              | 1856  | 1351 | 1513 | 976  | 757  | 1727  | 1662  | 1807   |
| <b>Sulfuricurvum</b>             | 409   | 132  | 47   | 56   | 121  | 192   | 91    | 195    |
| <b>Sulfurimonas</b>              | 330   | 237  | 123  | 132  | 83   | 285   | 160   | 1240   |



|                               |         |        |        |        |        |         |        |        |
|-------------------------------|---------|--------|--------|--------|--------|---------|--------|--------|
| <b>Wolinella</b>              | 112     | 127    | 64     | 70     | 104    | 108     | 73     | 50     |
| <b>Nitratifractor</b>         | 198     | 170    | 196    | 93     | 39     | 260     | 159    | 66     |
| <b>Nautilia</b>               | 291     | 208    | 120    | 81     | 57     | 287     | 228    | 161    |
| <b>Sulfurovum</b>             | 141     | 136    | 58     | 43     | 57     | 225     | 99     | 91     |
| <b>Nitratiruptor</b>          | 77      | 42     | 25     | 112    | 19     | 73      | 42     | 60     |
| <b>Bacteriovorax</b>          | 3728    | 546    | 826    | 803    | 518    | 379     | 571    | 361    |
| <b>Halobacteriovorax</b>      | 418     | 241    | 672    | 98     | 99     | 272     | 166    | 344    |
| <b>Bdellovibrio</b>           | 2231    | 1290   | 1219   | 748    | 577    | 1084    | 1022   | 491    |
| <b>Hydrogenophilus</b>        | 4389    | 581    | 225    | 1320   | 494    | 1334    | 884    | 277    |
| <b>Acidithiobacillus</b>      | 3287    | 1676   | 1305   | 3193   | 648    | 2163    | 2160   | 1984   |
| <b>Mariprofundus</b>          | 412     | 246    | 246    | 213    | 156    | 388     | 279    | 199    |
| <b>Faecalibacterium</b>       | 1834440 | 768956 | 468748 | 300790 | 449834 | 2120253 | 608140 | 136167 |
| <b>Ruminococcus</b>           | 106606  | 35763  | 39703  | 8717   | 6917   | 374392  | 30438  | 3220   |
| <b>Flavonifractor</b>         | 31147   | 28451  | 14465  | 6419   | 7519   | 58547   | 14088  | 2700   |
| <b>Ethanoligenens</b>         | 4876    | 3208   | 1442   | 915    | 843    | 7476    | 2151   | 650    |
| <b>Caproiciproducens</b>      | 4484    | 2697   | 1414   | 829    | 611    | 6920    | 2064   | 699    |
| <b>Acutalibacter</b>          | 2       | 1      | 1      | 0      | 2      | 4       | 0      | 1      |
| <b>Lachnoclostridium</b>      | 136804  | 54890  | 32232  | 23728  | 43475  | 172774  | 65896  | 7782   |
| <b>Anaerostipes</b>           | 95153   | 53465  | 33849  | 50516  | 23556  | 150250  | 41182  | 10727  |
| <b>Roseburia</b>              | 91714   | 64520  | 32725  | 18949  | 20122  | 153149  | 49064  | 6744   |
| <b>Blautia</b>                | 55003   | 36936  | 20558  | 13573  | 21296  | 92226   | 28324  | 5925   |
| <b>Butyrivibrio</b>           | 11252   | 7737   | 3531   | 2230   | 2391   | 17207   | 4744   | 1352   |
| <b>Lachnoanaerobaculum</b>    | 2947    | 1910   | 873    | 570    | 667    | 4324    | 1346   | 336    |
| <b>Cellulosilyticum</b>       | 2382    | 1445   | 569    | 469    | 394    | 3106    | 1093   | 439    |
| <b>Anaerotignum</b>           | 2024    | 1073   | 624    | 362    | 385    | 3190    | 909    | 253    |
| <b>Herbinix</b>               | 1781    | 1317   | 561    | 363    | 481    | 2660    | 868    | 261    |
| <b>Eubacterium</b>            | 138736  | 148497 | 53136  | 32232  | 41506  | 235772  | 80061  | 11519  |
| <b>Acetobacterium</b>         | 1216    | 752    | 668    | 305    | 400    | 1609    | 713    | 706    |
| <b>Intestinimonas</b>         | 42696   | 31155  | 13718  | 6914   | 5269   | 75108   | 20427  | 4148   |
| <b>Monoglobus</b>             | 4129    | 2917   | 1179   | 920    | 765    | 6715    | 3817   | 995    |
| <b>Clostridium</b>            | 60649   | 42248  | 21344  | 14885  | 21548  | 73365   | 33727  | 19187  |
| <b>Mordavella</b>             | 15149   | 9188   | 4765   | 3804   | 3976   | 29023   | 7418   | 1651   |
| <b>Alkaliphilus</b>           | 1153    | 618    | 406    | 184    | 227    | 1136    | 498    | 567    |
| <b>Geosporobacter</b>         | 979     | 493    | 740    | 369    | 176    | 991     | 377    | 519    |
| <b>Candidatus Arthromitus</b> | 430     | 297    | 140    | 140    | 88     | 450     | 251    | 200    |
| <b>Oscillibacter</b>          | 63294   | 56306  | 29374  | 12689  | 10638  | 156479  | 38731  | 7574   |
| <b>Clostridioides</b>         | 46052   | 26973  | 15095  | 9404   | 9949   | 75928   | 23848  | 4775   |
| <b>Acetoanaerobium</b>        | 9774    | 490    | 2923   | 319    | 354    | 1186    | 779    | 1803   |
| <b>Paeniclostridium</b>       | 1205    | 721    | 311    | 229    | 311    | 1453    | 961    | 402    |
| <b>Peptoclostridium</b>       | 1138    | 477    | 1119   | 196    | 156    | 1058    | 313    | 645    |

|                                |       |       |      |      |      |       |       |      |
|--------------------------------|-------|-------|------|------|------|-------|-------|------|
| <b>Filifactor</b>              | 664   | 424   | 225  | 177  | 163  | 896   | 379   | 119  |
| <b>Christensenella</b>         | 25516 | 18857 | 8721 | 4865 | 4186 | 44010 | 12640 | 2669 |
| <b>Desulfitobacterium</b>      | 3117  | 1568  | 1386 | 678  | 550  | 3406  | 1285  | 652  |
| <b>Syntrophobotulus</b>        | 2242  | 362   | 245  | 167  | 154  | 845   | 296   | 127  |
| <b>Desulfosporosinus</b>       | 1935  | 1117  | 1144 | 470  | 390  | 2019  | 1035  | 439  |
| <b>Desulfotomaculum</b>        | 1712  | 1008  | 584  | 544  | 425  | 1938  | 751   | 494  |
| <b>Dehalobacterium</b>         | 1677  | 708   | 787  | 327  | 246  | 1710  | 613   | 384  |
| <b>Dehalobacter</b>            | 1197  | 690   | 452  | 258  | 245  | 1650  | 669   | 262  |
| <b>Desulfallas</b>             | 739   | 417   | 241  | 175  | 143  | 913   | 315   | 154  |
| <b>Desulfofarcimen</b>         | 448   | 260   | 188  | 157  | 99   | 421   | 218   | 105  |
| <b>Candidatus Desulforudis</b> | 386   | 329   | 247  | 169  | 84   | 520   | 202   | 150  |
| <b>Thermincola</b>             | 358   | 184   | 172  | 140  | 62   | 416   | 164   | 125  |
| <b>Hungateiclostridium</b>     | 2896  | 1501  | 1345 | 637  | 531  | 3245  | 1000  | 637  |
| <b>Mageeibacillus</b>          | 1417  | 919   | 439  | 332  | 275  | 1806  | 723   | 222  |
| <b>Pseudoclostridium</b>       | 1127  | 638   | 356  | 236  | 231  | 1364  | 450   | 140  |
| <b>Ruminiclostridium</b>       | 844   | 511   | 265  | 155  | 166  | 1167  | 388   | 200  |
| <b>Thermoclostridium</b>       | 749   | 490   | 274  | 147  | 166  | 1178  | 330   | 136  |
| <b>Fastidiosipila</b>          | 570   | 326   | 111  | 98   | 77   | 601   | 259   | 193  |
| <b>Aminipila</b>               | 2126  | 1050  | 614  | 485  | 392  | 2654  | 861   | 357  |
| <b>Mogibacterium</b>           | 1571  | 749   | 411  | 369  | 326  | 1881  | 671   | 214  |
| <b>Thermaerobacter</b>         | 696   | 589   | 378  | 428  | 220  | 924   | 484   | 213  |
| <b>Carboxydocella</b>          | 512   | 283   | 167  | 125  | 139  | 542   | 212   | 92   |
| <b>Symbiobacterium</b>         | 1186  | 939   | 630  | 523  | 308  | 1496  | 657   | 265  |
| <b>Heliobacterium</b>          | 1143  | 696   | 430  | 311  | 211  | 1301  | 473   | 195  |
| <b>Syntrophomonas</b>          | 268   | 141   | 105  | 69   | 48   | 295   | 115   | 163  |
| <b>Syntrophothermus</b>        | 168   | 118   | 45   | 40   | 36   | 214   | 68    | 107  |
| <b>Caldicellulosiruptor</b>    | 1993  | 1212  | 795  | 583  | 576  | 2305  | 1075  | 626  |
| <b>Thermoanaerobacterium</b>   | 1731  | 902   | 728  | 447  | 766  | 1597  | 799   | 443  |
| <b>Thermosediminibacter</b>    | 364   | 182   | 105  | 82   | 36   | 407   | 145   | 150  |
| <b>Thermoanaerobacter</b>      | 1073  | 608   | 372  | 318  | 251  | 1109  | 488   | 556  |
| <b>Moorella</b>                | 721   | 312   | 197  | 278  | 149  | 649   | 296   | 138  |
| <b>Ammonifex</b>               | 245   | 178   | 143  | 107  | 73   | 332   | 107   | 49   |
| <b>Tepidanaerobacter</b>       | 356   | 180   | 94   | 82   | 63   | 436   | 169   | 211  |
| <b>Thermacetogenium</b>        | 336   | 217   | 149  | 126  | 89   | 391   | 156   | 86   |
| <b>Caldanaerobacter</b>        | 315   | 200   | 94   | 77   | 51   | 311   | 125   | 105  |
| <b>Thermanaeromonas</b>        | 179   | 103   | 120  | 49   | 50   | 215   | 96    | 58   |
| <b>Carboxydotherrmus</b>       | 147   | 98    | 54   | 33   | 37   | 173   | 72    | 43   |
| <b>Mahella</b>                 | 589   | 263   | 153  | 94   | 78   | 574   | 166   | 208  |
| <b>Thermodesulfobium</b>       | 152   | 198   | 47   | 84   | 48   | 171   | 124   | 106  |
| <b>Halanaerobium</b>           | 509   | 407   | 176  | 128  | 133  | 507   | 378   | 286  |

|                            |        |       |       |        |        |       |       |        |
|----------------------------|--------|-------|-------|--------|--------|-------|-------|--------|
| <b>Halocella</b>           | 331    | 202   | 83    | 113    | 71     | 380   | 142   | 104    |
| <b>Halothermothrix</b>     | 148    | 118   | 36    | 37     | 36     | 160   | 76    | 68     |
| <b>Halobacteroides</b>     | 356    | 197   | 92    | 81     | 59     | 277   | 470   | 170    |
| <b>Acetohalobium</b>       | 352    | 150   | 93    | 81     | 72     | 305   | 129   | 80     |
| <b>Anoxybacter</b>         | 357    | 211   | 129   | 127    | 62     | 338   | 158   | 106    |
| <b>Natranaerobius</b>      | 229    | 134   | 61    | 42     | 47     | 206   | 205   | 90     |
| <b>Lactobacillus</b>       | 109132 | 18997 | 18877 | 22959  | 165652 | 34166 | 34892 | 14491  |
| <b>Pediococcus</b>         | 5240   | 510   | 934   | 982    | 991    | 871   | 480   | 825    |
| <b>Streptococcus</b>       | 61959  | 19556 | 21987 | 15664  | 22571  | 51253 | 37344 | 33483  |
| <b>Lactococcus</b>         | 9212   | 14681 | 9311  | 9205   | 8212   | 15436 | 13572 | 515659 |
| <b>Enterococcus</b>        | 47805  | 18690 | 33515 | 227459 | 303323 | 42718 | 32440 | 19397  |
| <b>Tetragenococcus</b>     | 958    | 571   | 2081  | 380    | 220    | 1670  | 770   | 1089   |
| <b>Vagococcus</b>          | 534    | 286   | 1285  | 216    | 153    | 799   | 342   | 766    |
| <b>Melissococcus</b>       | 284    | 127   | 397   | 57     | 96     | 378   | 254   | 291    |
| <b>Carnobacterium</b>      | 1582   | 948   | 10687 | 4772   | 561    | 3233  | 2267  | 8333   |
| <b>Jeotgalibaca</b>        | 1091   | 591   | 14600 | 866    | 406    | 3653  | 1551  | 7192   |
| <b>Marinilactibacillus</b> | 284    | 199   | 1348  | 138    | 112    | 565   | 245   | 554    |
| <b>Leuconostoc</b>         | 1099   | 875   | 2050  | 572    | 552    | 1071  | 680   | 2476   |
| <b>Weissella</b>           | 661    | 415   | 778   | 208    | 368    | 701   | 532   | 660    |
| <b>Oenococcus</b>          | 385    | 300   | 591   | 191    | 142    | 477   | 375   | 236    |
| <b>Aerococcus</b>          | 1323   | 810   | 7345  | 750    | 1180   | 2128  | 1373  | 4214   |
| <b>Bacillus</b>            | 30526  | 18269 | 24339 | 11460  | 10593  | 30296 | 18251 | 19042  |
| <b>Anoxybacillus</b>       | 2813   | 832   | 818   | 1146   | 4163   | 1645  | 1101  | 617    |
| <b>Geobacillus</b>         | 2657   | 1560  | 1828  | 965    | 1540   | 2718  | 1656  | 1075   |
| <b>Virgibacillus</b>       | 1859   | 1153  | 1305  | 607    | 512    | 2093  | 1088  | 1330   |
| <b>Lysinibacillus</b>      | 1752   | 1032  | 1061  | 531    | 438    | 1793  | 978   | 1412   |
| <b>Oceanobacillus</b>      | 910    | 657   | 636   | 291    | 234    | 1044  | 739   | 492    |
| <b>Halobacillus</b>        | 882    | 693   | 823   | 824    | 212    | 1081  | 640   | 686    |
| <b>Fictibacillus</b>       | 582    | 363   | 270   | 187    | 168    | 584   | 323   | 249    |
| <b>Lentibacillus</b>       | 363    | 155   | 102   | 81     | 67     | 266   | 141   | 83     |
| <b>Parageobacillus</b>     | 362    | 166   | 355   | 156    | 311    | 310   | 174   | 189    |
| <b>Paraliobacillus</b>     | 306    | 148   | 158   | 58     | 51     | 249   | 111   | 167    |
| <b>Aeribacillus</b>        | 304    | 176   | 145   | 104    | 179    | 388   | 150   | 110    |
| <b>Salimicrobium</b>       | 289    | 162   | 184   | 77     | 56     | 320   | 109   | 130    |
| <b>Terribacillus</b>       | 259    | 189   | 309   | 136    | 57     | 352   | 167   | 253    |
| <b>Amphibacillus</b>       | 222    | 151   | 568   | 68     | 61     | 312   | 126   | 189    |
| <b>Paenibacillus</b>       | 26596  | 18425 | 17066 | 9349   | 7097   | 34451 | 14316 | 9824   |
| <b>Brevibacillus</b>       | 2807   | 1895  | 1475  | 944    | 699    | 2949  | 1629  | 1275   |
| <b>Thermobacillus</b>      | 1314   | 1001  | 528   | 467    | 316    | 1623  | 643   | 243    |
| <b>Cohnella</b>            | 1049   | 722   | 495   | 464    | 227    | 1264  | 515   | 316    |

|                               |       |       |       |       |       |       |       |      |
|-------------------------------|-------|-------|-------|-------|-------|-------|-------|------|
| <b>Aneurinibacillus</b>       | 754   | 386   | 302   | 735   | 187   | 905   | 474   | 323  |
| <b>Staphylococcus</b>         | 8277  | 4847  | 8043  | 2809  | 2376  | 7408  | 5467  | 6581 |
| <b>Macrococcus</b>            | 566   | 332   | 503   | 200   | 117   | 610   | 274   | 489  |
| <b>Salinicoccus</b>           | 237   | 146   | 139   | 59    | 49    | 288   | 144   | 86   |
| <b>Jeotgalicoccus</b>         | 181   | 123   | 93    | 49    | 53    | 266   | 93    | 80   |
| <b>Auricoccus</b>             | 133   | 114   | 199   | 35    | 31    | 134   | 155   | 72   |
| <b>Planococcus</b>            | 2436  | 2178  | 3512  | 1188  | 598   | 2943  | 1404  | 2427 |
| <b>Sporosarcina</b>           | 1439  | 911   | 1170  | 667   | 373   | 1813  | 1097  | 874  |
| <b>Solibacillus</b>           | 721   | 381   | 497   | 165   | 174   | 754   | 380   | 401  |
| <b>Kurthia</b>                | 444   | 1253  | 293   | 168   | 85    | 406   | 303   | 881  |
| <b>Jeotgalibacillus</b>       | 395   | 236   | 189   | 91    | 64    | 423   | 301   | 103  |
| <b>Ureibacillus</b>           | 362   | 195   | 161   | 72    | 69    | 306   | 144   | 192  |
| <b>Rummeliibacillus</b>       | 207   | 154   | 649   | 70    | 35    | 174   | 132   | 176  |
| <b>Paenisporosarcina</b>      | 159   | 79    | 148   | 112   | 43    | 132   | 215   | 102  |
| <b>Alicyclobacillus</b>       | 1541  | 713   | 354   | 838   | 1662  | 1261  | 905   | 224  |
| <b>Tumebacillus</b>           | 1470  | 1064  | 599   | 484   | 490   | 1778  | 710   | 364  |
| <b>Kyrpidia</b>               | 333   | 251   | 212   | 159   | 95    | 455   | 160   | 120  |
| <b>Listeria</b>               | 2142  | 1274  | 2600  | 670   | 512   | 2426  | 1411  | 2608 |
| <b>Brochothrix</b>            | 287   | 160   | 274   | 377   | 78    | 290   | 202   | 440  |
| <b>Exiguobacterium</b>        | 932   | 771   | 2156  | 597   | 281   | 1182  | 639   | 972  |
| <b>Gemella</b>                | 892   | 550   | 300   | 289   | 211   | 864   | 424   | 436  |
| <b>Laceyella</b>              | 209   | 171   | 182   | 76    | 65    | 297   | 139   | 107  |
| <b>Novibacillus</b>           | 205   | 130   | 129   | 65    | 41    | 256   | 96    | 93   |
| <b>Sporolactobacillus</b>     | 427   | 219   | 201   | 95    | 83    | 430   | 138   | 172  |
| <b>Veillonella</b>            | 97926 | 13653 | 4294  | 19520 | 17109 | 22463 | 30962 | 3579 |
| <b>Dialister</b>              | 48394 | 15197 | 9633  | 7037  | 5021  | 28288 | 15363 | 4184 |
| <b>Megasphaera</b>            | 11725 | 7717  | 10082 | 2079  | 4427  | 10910 | 16430 | 6749 |
| <b>Negativicoccus</b>         | 1249  | 649   | 455   | 364   | 381   | 771   | 679   | 186  |
| <b>Phascolarctobacterium</b>  | 50118 | 21004 | 6828  | 12175 | 27479 | 65509 | 12642 | 6199 |
| <b>Acidaminococcus</b>        | 6301  | 6370  | 5393  | 1832  | 2426  | 12969 | 14211 | 1156 |
| <b>Megamonas</b>              | 17569 | 1347  | 596   | 856   | 477   | 1675  | 2949  | 671  |
| <b>Selenomonas</b>            | 8409  | 7620  | 2986  | 2562  | 1590  | 10432 | 6569  | 3452 |
| <b>Pelosinus</b>              | 2112  | 701   | 409   | 535   | 425   | 1118  | 718   | 670  |
| <b>Methylomusa</b>            | 1282  | 449   | 241   | 377   | 206   | 777   | 388   | 207  |
| <b>Faecalitalea</b>           | 24460 | 12855 | 7972  | 5395  | 6312  | 38398 | 12105 | 2628 |
| <b>Faecalibaculum</b>         | 1726  | 1098  | 740   | 444   | 451   | 2629  | 855   | 217  |
| <b>Turicibacter</b>           | 1438  | 1077  | 445   | 314   | 420   | 2056  | 710   | 355  |
| <b>Erysipelothrix</b>         | 1223  | 567   | 559   | 578   | 179   | 1001  | 447   | 419  |
| <b>Erysipelatoclostridium</b> | 61    | 10    | 6     | 27    | 36    | 81    | 38    | 3    |
| <b>Peptoniphilus</b>          | 1606  | 866   | 609   | 350   | 668   | 1481  | 1129  | 359  |

|                            |        |        |        |         |        |        |         |       |
|----------------------------|--------|--------|--------|---------|--------|--------|---------|-------|
| <b>Finegoldia</b>          | 1324   | 513    | 390    | 331     | 446    | 790    | 573     | 246   |
| <b>Parvimonas</b>          | 873    | 478    | 267    | 251     | 199    | 843    | 406     | 255   |
| <b>Murdochiella</b>        | 806    | 576    | 330    | 186     | 172    | 1216   | 485     | 142   |
| <b>Anaerococcus</b>        | 699    | 418    | 183    | 176     | 291    | 729    | 394     | 165   |
| <b>Soehngenia</b>          | 555    | 327    | 419    | 100     | 112    | 584    | 218     | 348   |
| <b>Sporanaerobacter</b>    | 1215   | 443    | 338    | 192     | 180    | 1046   | 350     | 430   |
| <b>Gottschalkia</b>        | 656    | 352    | 203    | 123     | 100    | 670    | 355     | 209   |
| <b>Ezakiella</b>           | 712    | 240    | 139    | 93      | 249    | 289    | 248     | 95    |
| <b>Ndongobacter</b>        | 717    | 496    | 231    | 218     | 123    | 1128   | 355     | 108   |
| <b>Limnochorda</b>         | 617    | 476    | 313    | 308     | 190    | 711    | 297     | 158   |
| <b>Bifidobacterium</b>     | 691410 | 139606 | 139402 | 271361  | 208482 | 358783 | 135467  | 80834 |
| <b>Gardnerella</b>         | 13129  | 2786   | 1747   | 4650    | 5258   | 2004   | 4046    | 360   |
| <b>Parascardovia</b>       | 338    | 223    | 183    | 203     | 679    | 498    | 184     | 77    |
| <b>Scardovia</b>           | 236    | 130    | 67     | 60      | 66     | 279    | 95      | 29    |
| <b>Microbacterium</b>      | 188515 | 395489 | 144098 | 2108052 | 386812 | 189936 | 1014282 | 40738 |
| <b>Leucobacter</b>         | 7917   | 8132   | 16043  | 24245   | 5786   | 3404   | 8001    | 2388  |
| <b>Agromyces</b>           | 7771   | 12989  | 10286  | 21332   | 7294   | 5503   | 10423   | 3571  |
| <b>Leifsonia</b>           | 4819   | 7921   | 5986   | 11531   | 4302   | 3723   | 7793    | 2239  |
| <b>Rathayibacter</b>       | 3576   | 4807   | 4286   | 7228    | 2893   | 2607   | 3929    | 1643  |
| <b>Clavibacter</b>         | 3245   | 4340   | 4320   | 6163    | 2972   | 2312   | 3894    | 1761  |
| <b>Agrococcus</b>          | 2918   | 3716   | 4086   | 5867    | 2383   | 1903   | 3284    | 1112  |
| <b>Curtobacterium</b>      | 2873   | 3866   | 3742   | 5564    | 2199   | 2002   | 3194    | 1249  |
| <b>Cryobacterium</b>       | 2772   | 3987   | 3183   | 6074    | 2306   | 2036   | 3469    | 1654  |
| <b>Lysinimonas</b>         | 2685   | 3247   | 3653   | 5343    | 2405   | 1647   | 3263    | 1111  |
| <b>Microterricola</b>      | 2606   | 4482   | 3363   | 6353    | 2278   | 1905   | 3309    | 1882  |
| <b>Fron dih abitans</b>    | 1938   | 2767   | 2668   | 5110    | 1712   | 1525   | 2498    | 1094  |
| <b>Plantibacter</b>        | 1719   | 2885   | 2767   | 4730    | 1488   | 1223   | 2337    | 966   |
| <b>Gryllotalpicola</b>     | 1260   | 2152   | 1568   | 2804    | 1212   | 922    | 2095    | 590   |
| <b>Salinibacterium</b>     | 1070   | 1169   | 1131   | 3116    | 1112   | 756    | 2013    | 1040  |
| <b>Microcella</b>          | 1008   | 1282   | 1391   | 3153    | 962    | 748    | 1711    | 553   |
| <b>Mycetocola</b>          | 627    | 779    | 763    | 1355    | 433    | 485    | 693     | 373   |
| <b>Humibacter</b>          | 519    | 611    | 659    | 1094    | 371    | 325    | 631     | 213   |
| <b>Cnuibacter</b>          | 441    | 621    | 434    | 1163    | 436    | 323    | 648     | 247   |
| <b>Aurantimicrobium</b>    | 330    | 286    | 275    | 473     | 186    | 255    | 234     | 221   |
| <b>Rhodoluna</b>           | 164    | 106    | 145    | 121     | 79     | 92     | 85      | 107   |
| <b>Candidatus Aquiluna</b> | 65     | 54     | 39     | 83      | 26     | 88     | 45      | 53    |
| <b>Pontimonas</b>          | 137    | 85     | 75     | 162     | 59     | 159    | 73      | 53    |
| <b>Arthrobacter</b>        | 9729   | 11123  | 9147   | 11715   | 5485   | 6906   | 8116    | 5510  |
| <b>Kocuria</b>             | 5006   | 5733   | 7577   | 7761    | 4071   | 4005   | 5161    | 2198  |
| <b>Rothia</b>              | 2931   | 1531   | 750    | 1173    | 1859   | 1570   | 2199    | 558   |

|                           |        |       |       |       |        |       |       |       |
|---------------------------|--------|-------|-------|-------|--------|-------|-------|-------|
| <b>Pseudarthrobacter</b>  | 2563   | 3923  | 2905  | 4151  | 1846   | 2251  | 2440  | 1047  |
| <b>Zhihengliuella</b>     | 1709   | 3074  | 1623  | 11718 | 1133   | 1071  | 3401  | 296   |
| <b>Micrococcus</b>        | 1488   | 1588  | 2488  | 2959  | 1766   | 1242  | 1493  | 782   |
| <b>Glutamicibacter</b>    | 1349   | 1234  | 1399  | 2712  | 835    | 1157  | 1317  | 707   |
| <b>Sinomonas</b>          | 1034   | 1408  | 1516  | 1908  | 853    | 806   | 1125  | 425   |
| <b>Auritidibacter</b>     | 339    | 217   | 249   | 393   | 139    | 158   | 309   | 79    |
| <b>Neomicrococcus</b>     | 290    | 282   | 294   | 286   | 167    | 242   | 172   | 169   |
| <b>Psychromicrobium</b>   | 240    | 211   | 203   | 326   | 161    | 163   | 158   | 135   |
| <b>Renibacterium</b>      | 145    | 118   | 92    | 98    | 54     | 100   | 107   | 66    |
| <b>Paenarthrobacter</b>   | 110    | 136   | 140   | 172   | 131    | 73    | 136   | 57    |
| <b>Serinicoccus</b>       | 3116   | 3335  | 5727  | 3793  | 2109   | 2006  | 2761  | 962   |
| <b>Janibacter</b>         | 2585   | 2805  | 3458  | 3498  | 2026   | 1628  | 2529  | 1109  |
| <b>Arsenicicoccus</b>     | 2010   | 1676  | 2688  | 1813  | 1177   | 1080  | 1587  | 611   |
| <b>Phycococcus</b>        | 1654   | 2221  | 1709  | 1624  | 1345   | 971   | 1430  | 736   |
| <b>Ornithinimicrobium</b> | 1635   | 1578  | 2411  | 1835  | 1166   | 980   | 1324  | 438   |
| <b>Intrasporangium</b>    | 1561   | 1874  | 2253  | 1797  | 1332   | 1112  | 1326  | 659   |
| <b>Cellulosimicrobium</b> | 2675   | 2726  | 7308  | 3654  | 1910   | 2120  | 2333  | 1180  |
| <b>Isoptericola</b>       | 2424   | 2403  | 5330  | 3099  | 1993   | 1924  | 2073  | 964   |
| <b>Xylanibacterium</b>    | 1227   | 1372  | 2350  | 1933  | 1020   | 961   | 1167  | 429   |
| <b>Xylanimicrobium</b>    | 1192   | 1223  | 2868  | 1537  | 875    | 880   | 1086  | 365   |
| <b>Xylanimonas</b>        | 1041   | 1215  | 2354  | 1629  | 860    | 792   | 1061  | 385   |
| <b>Cellulomonas</b>       | 5874   | 6302  | 21772 | 8761  | 4961   | 4769  | 5192  | 2250  |
| <b>Paraoerskovia</b>      | 787    | 842   | 1858  | 1072  | 600    | 659   | 684   | 318   |
| <b>Brachybacterium</b>    | 5459   | 5884  | 7414  | 7667  | 3810   | 4485  | 4960  | 1697  |
| <b>Dermabacter</b>        | 290    | 225   | 470   | 710   | 188    | 227   | 268   | 111   |
| <b>Devriesea</b>          | 215    | 195   | 179   | 232   | 134    | 207   | 209   | 102   |
| <b>Miniimonas</b>         | 2528   | 2664  | 5326  | 7047  | 2032   | 2003  | 4621  | 1060  |
| <b>Beutenbergia</b>       | 1327   | 1484  | 2734  | 2222  | 1008   | 945   | 1255  | 416   |
| <b>Brevibacterium</b>     | 3706   | 4317  | 5205  | 12435 | 2693   | 2940  | 4826  | 1396  |
| <b>Kytococcus</b>         | 1137   | 1417  | 2030  | 2565  | 795    | 745   | 1223  | 363   |
| <b>Dermacoccus</b>        | 1095   | 1040  | 1771  | 1628  | 836    | 791   | 1055  | 672   |
| <b>Luteipulveratus</b>    | 1007   | 1119  | 1159  | 1170  | 812    | 699   | 939   | 449   |
| <b>Sanguibacter</b>       | 1264   | 1224  | 3234  | 1934  | 898    | 1102  | 1097  | 621   |
| <b>Georgenia</b>          | 1139   | 964   | 1921  | 1582  | 792    | 945   | 1008  | 386   |
| <b>Austwickia</b>         | 690    | 494   | 1009  | 676   | 438    | 507   | 604   | 229   |
| <b>Dermatophilus</b>      | 271    | 194   | 297   | 167   | 158    | 195   | 165   | 136   |
| <b>Jonesia</b>            | 220    | 160   | 333   | 295   | 107    | 161   | 264   | 97    |
| <b>Tropheryma</b>         | 44     | 14    | 14    | 11    | 5      | 25    | 14    | 10    |
| <b>Mycobacterium</b>      | 120027 | 72439 | 23556 | 57791 | 194806 | 46079 | 73063 | 16920 |
| <b>Mycolicibacterium</b>  | 76707  | 48933 | 16254 | 41728 | 141509 | 30280 | 51943 | 12787 |

|                                |        |        |        |        |       |       |       |       |
|--------------------------------|--------|--------|--------|--------|-------|-------|-------|-------|
| <b>Mycobacteroides</b>         | 8484   | 5312   | 2047   | 4851   | 12488 | 3934  | 6295  | 1568  |
| <b>Mycolicibacter</b>          | 7407   | 4774   | 1755   | 3962   | 8466  | 3446  | 5778  | 1135  |
| <b>Hoyosella</b>               | 376    | 284    | 272    | 355    | 347   | 254   | 318   | 171   |
| <b>Rhodococcus</b>             | 21602  | 24193  | 15306  | 31121  | 28731 | 14103 | 17470 | 8913  |
| <b>Nocardia</b>                | 14805  | 12707  | 9643   | 13737  | 14370 | 8964  | 11147 | 4394  |
| <b>Corynebacterium</b>         | 21785  | 17806  | 19373  | 20841  | 12243 | 19357 | 15559 | 7285  |
| <b>Gordonia</b>                | 15236  | 11381  | 8543   | 11861  | 12338 | 7180  | 12110 | 3443  |
| <b>Dietzia</b>                 | 5134   | 2714   | 3280   | 3145   | 2513  | 2138  | 2548  | 2270  |
| <b>Tsukamurella</b>            | 3221   | 2883   | 2624   | 3184   | 3457  | 1729  | 2521  | 1558  |
| <b>Segniliparus</b>            | 423    | 497    | 255    | 327    | 341   | 388   | 317   | 143   |
| <b>Lawsonella</b>              | 280    | 207    | 160    | 180    | 259   | 1439  | 179   | 68    |
| <b>Micropruina</b>             | 43853  | 48015  | 33893  | 21004  | 30226 | 27926 | 55659 | 3846  |
| <b>Nocardioides</b>            | 8681   | 9944   | 9601   | 9341   | 6455  | 5668  | 7706  | 2860  |
| <b>Aeromicrobium</b>           | 5581   | 5097   | 6817   | 6052   | 3802  | 3582  | 4577  | 1862  |
| <b>Friedmanniella</b>          | 4822   | 5743   | 7354   | 6270   | 3953  | 3319  | 5358  | 1158  |
| <b>Pimelobacter</b>            | 2038   | 2331   | 2174   | 2332   | 1471  | 1270  | 1903  | 606   |
| <b>Kribbella</b>               | 1838   | 2043   | 2066   | 2152   | 1333  | 1196  | 1709  | 461   |
| <b>Marmoricola</b>             | 1443   | 1799   | 1817   | 1698   | 1161  | 903   | 1304  | 614   |
| <b>Actinopolymorpha</b>        | 1152   | 1197   | 1295   | 1335   | 970   | 811   | 1044  | 361   |
| <b>Tessaracoccus</b>           | 27056  | 25874  | 154037 | 42229  | 15644 | 30860 | 35589 | 6288  |
| <b>Microlunatus</b>            | 17434  | 7418   | 8026   | 10917  | 3946  | 5294  | 16262 | 1746  |
| <b>Propionibacterium</b>       | 7112   | 7736   | 11555  | 13742  | 7250  | 6235  | 8209  | 1802  |
| <b>Acidipropionibacterium</b>  | 6133   | 5793   | 9581   | 7755   | 5351  | 4511  | 6572  | 1373  |
| <b>Auraticoccus</b>            | 2263   | 2778   | 3984   | 3273   | 1762  | 1572  | 2398  | 561   |
| <b>Cutibacterium</b>           | 2068   | 1814   | 2996   | 2137   | 1725  | 1822  | 1878  | 612   |
| <b>Pseudopropionibacterium</b> | 1939   | 1931   | 5584   | 2709   | 1420  | 1698  | 1845  | 450   |
| <b>Propionimicrobium</b>       | 255    | 199    | 126    | 143    | 191   | 409   | 187   | 75    |
| <b>Streptomyces</b>            | 101203 | 102004 | 94520  | 111361 | 73507 | 73500 | 84228 | 36807 |
| <b>Kitasatospora</b>           | 4113   | 4184   | 3520   | 4265   | 2667  | 2946  | 3559  | 1375  |
| <b>Streptacidiphilus</b>       | 995    | 855    | 761    | 925    | 593   | 817   | 812   | 329   |
| <b>Amycolatopsis</b>           | 10267  | 10412  | 8046   | 11435  | 7968  | 6902  | 8451  | 3415  |
| <b>Pseudonocardia</b>          | 9095   | 8547   | 7151   | 9080   | 6605  | 5312  | 7990  | 2618  |
| <b>Actinoalloteichus</b>       | 3511   | 3133   | 2619   | 4562   | 2141  | 2367  | 2852  | 1128  |
| <b>Saccharomonospora</b>       | 3120   | 3171   | 2734   | 3256   | 2402  | 2395  | 2650  | 1157  |
| <b>Actinosynnema</b>           | 2141   | 2049   | 1850   | 2328   | 1472  | 1596  | 1806  | 853   |
| <b>Kutzneria</b>               | 1589   | 1492   | 1325   | 1498   | 1165  | 1000  | 1253  | 479   |
| <b>Lentzea</b>                 | 1568   | 1492   | 1755   | 1576   | 1062  | 953   | 1171  | 451   |
| <b>Saccharothrix</b>           | 1367   | 1429   | 1174   | 1546   | 1013  | 937   | 1238  | 580   |
| <b>Kibdelosporangium</b>       | 1348   | 1494   | 972    | 1389   | 955   | 882   | 1084  | 476   |
| <b>Saccharopolyspora</b>       | 1328   | 1461   | 1369   | 1562   | 1037  | 843   | 1104  | 418   |

|                                 |        |       |       |       |       |       |       |       |
|---------------------------------|--------|-------|-------|-------|-------|-------|-------|-------|
| <b>Allokutzneria</b>            | 1305   | 1250  | 1084  | 1527  | 866   | 867   | 974   | 385   |
| <b>Alloactinosynnema</b>        | 1195   | 1119  | 953   | 1232  | 920   | 780   | 986   | 399   |
| <b>Prauserella</b>              | 769    | 691   | 726   | 896   | 562   | 620   | 620   | 269   |
| <b>Micromonospora</b>           | 17614  | 18358 | 15891 | 20013 | 12088 | 11762 | 14858 | 5732  |
| <b>Actinoplanes</b>             | 9763   | 10957 | 8141  | 10992 | 6751  | 6788  | 7877  | 3184  |
| <b>Plantactinospora</b>         | 2434   | 2624  | 2247  | 2586  | 1609  | 1689  | 2000  | 808   |
| <b>Salinispora</b>              | 940    | 817   | 811   | 952   | 673   | 683   | 811   | 357   |
| <b>Verrucosispora</b>           | 873    | 788   | 764   | 930   | 664   | 630   | 694   | 296   |
| <b>Actinomyces</b>              | 13819  | 9063  | 13004 | 10705 | 7588  | 9747  | 8389  | 3062  |
| <b>Flaviflexus</b>              | 1793   | 923   | 1685  | 2088  | 619   | 832   | 928   | 327   |
| <b>Schaalia</b>                 | 1319   | 670   | 1037  | 725   | 755   | 1208  | 821   | 223   |
| <b>Trueperella</b>              | 826    | 625   | 541   | 458   | 401   | 889   | 539   | 195   |
| <b>Actinotignum</b>             | 356    | 189   | 242   | 266   | 1197  | 300   | 2894  | 116   |
| <b>Actinobaculum</b>            | 292    | 188   | 204   | 146   | 96    | 234   | 137   | 90    |
| <b>Mobiluncus</b>               | 249    | 107   | 102   | 102   | 115   | 240   | 126   | 55    |
| <b>Arcanobacterium</b>          | 241    | 176   | 129   | 125   | 103   | 267   | 145   | 65    |
| <b>Nakamurella</b>              | 17670  | 27840 | 2957  | 6358  | 11649 | 7590  | 10244 | 5305  |
| <b>Streptosporangium</b>        | 2825   | 2874  | 2484  | 2824  | 2014  | 2189  | 2444  | 960   |
| <b>Nonomuraea</b>               | 2415   | 2451  | 2286  | 2591  | 1675  | 1651  | 1916  | 806   |
| <b>Nocardiosis</b>              | 2794   | 2632  | 2658  | 3038  | 1784  | 2118  | 2133  | 935   |
| <b>Streptomonospora</b>         | 897    | 824   | 836   | 954   | 576   | 603   | 695   | 297   |
| <b>Thermobifida</b>             | 420    | 416   | 328   | 355   | 267   | 320   | 341   | 133   |
| <b>Actinomadura</b>             | 1258   | 1254  | 1291  | 1117  | 806   | 867   | 929   | 473   |
| <b>Thermomonospora</b>          | 1047   | 964   | 873   | 862   | 689   | 798   | 798   | 403   |
| <b>Frankia</b>                  | 6047   | 5640  | 5128  | 6391  | 4312  | 4260  | 4852  | 2101  |
| <b>Jatrophihabitans</b>         | 577    | 645   | 432   | 667   | 454   | 454   | 555   | 245   |
| <b>Modestobacter</b>            | 1463   | 1624  | 1440  | 1593  | 1083  | 990   | 1261  | 528   |
| <b>Geodermatophilus</b>         | 1276   | 1389  | 1165  | 1327  | 983   | 805   | 1111  | 492   |
| <b>Blastococcus</b>             | 1161   | 1259  | 1088  | 1264  | 849   | 903   | 998   | 398   |
| <b>Jiangella</b>                | 3731   | 3921  | 3891  | 4785  | 2611  | 2621  | 3480  | 1068  |
| <b>Catenulispora</b>            | 1529   | 1494  | 1335  | 1645  | 1016  | 1088  | 1255  | 646   |
| <b>Kineococcus</b>              | 1273   | 1213  | 1662  | 1478  | 857   | 1037  | 1069  | 616   |
| <b>Stackebrandtia</b>           | 1055   | 980   | 917   | 1102  | 638   | 824   | 771   | 372   |
| <b>Thermobispora</b>            | 803    | 766   | 838   | 803   | 549   | 491   | 643   | 212   |
| <b>Candidatus Planktophila</b>  | 598    | 462   | 1034  | 201   | 160   | 598   | 347   | 2209  |
| <b>Candidatus Nanopelagicus</b> | 187    | 155   | 84    | 92    | 55    | 188   | 221   | 278   |
| <b>Actinopolyspora</b>          | 428    | 476   | 409   | 465   | 305   | 336   | 385   | 162   |
| <b>Acidothermus</b>             | 272    | 236   | 155   | 224   | 149   | 174   | 181   | 112   |
| <b>Collinsella</b>              | 120084 | 37312 | 22677 | 19563 | 48884 | 62239 | 36977 | 10742 |
| <b>Coriobacterium</b>           | 780    | 494   | 251   | 188   | 251   | 1066  | 364   | 131   |



|                                |       |      |      |      |      |       |      |      |
|--------------------------------|-------|------|------|------|------|-------|------|------|
| <b>Olsenella</b>               | 13792 | 7775 | 4011 | 2524 | 2620 | 14472 | 5756 | 3581 |
| <b>Parolsenella</b>            | 2366  | 1781 | 1029 | 526  | 3061 | 4726  | 1172 | 464  |
| <b>Libanicoccus</b>            | 1937  | 1382 | 719  | 453  | 607  | 2357  | 1126 | 394  |
| <b>Atopobium</b>               | 667   | 273  | 233  | 504  | 261  | 593   | 244  | 96   |
| <b>Gordonibacter</b>           | 7572  | 4840 | 2759 | 2804 | 5249 | 9903  | 4473 | 1225 |
| <b>Eggerthella</b>             | 7525  | 6622 | 2879 | 5465 | 7586 | 12962 | 5956 | 1187 |
| <b>Adlercreutzia</b>           | 4897  | 4089 | 1990 | 2041 | 1376 | 19378 | 3241 | 824  |
| <b>Slackia</b>                 | 1992  | 1240 | 731  | 530  | 640  | 2658  | 988  | 314  |
| <b>Denitrobacterium</b>        | 1237  | 790  | 321  | 273  | 419  | 1335  | 567  | 155  |
| <b>Phoenicibacter</b>          | 1047  | 546  | 277  | 397  | 363  | 1984  | 607  | 154  |
| <b>Cryptobacterium</b>         | 260   | 151  | 77   | 73   | 74   | 307   | 120  | 80   |
| <b>Euzebya</b>                 | 933   | 823  | 664  | 1033 | 549  | 699   | 669  | 409  |
| <b>Egicoccus</b>               | 786   | 708  | 758  | 675  | 456  | 577   | 568  | 326  |
| <b>Egibacter</b>               | 618   | 519  | 416  | 632  | 378  | 457   | 438  | 282  |
| <b>Conexibacter</b>            | 1598  | 1566 | 1032 | 1662 | 918  | 1232  | 1159 | 519  |
| <b>Rubrobacter</b>             | 928   | 863  | 660  | 699  | 424  | 955   | 623  | 271  |
| <b>Acidimicrobium</b>          | 271   | 224  | 169  | 340  | 149  | 218   | 177  | 171  |
| <b>Oscillatoria</b>            | 14913 | 1180 | 4011 | 1383 | 540  | 590   | 571  | 227  |
| <b>Moorea</b>                  | 287   | 251  | 387  | 177  | 86   | 241   | 237  | 208  |
| <b>Cyanothece</b>              | 729   | 451  | 283  | 375  | 226  | 615   | 406  | 599  |
| <b>Microcoleus</b>             | 205   | 317  | 90   | 123  | 52   | 192   | 124  | 143  |
| <b>Arthrospira</b>             | 165   | 136  | 102  | 57   | 55   | 152   | 110  | 302  |
| <b>Planktothrix</b>            | 120   | 110  | 75   | 139  | 28   | 89    | 87   | 495  |
| <b>Trichodesmium</b>           | 107   | 118  | 60   | 54   | 47   | 129   | 167  | 210  |
| <b>Geitlerinema</b>            | 319   | 215  | 190  | 174  | 102  | 278   | 187  | 134  |
| <b>Crinalium</b>               | 168   | 96   | 82   | 51   | 38   | 117   | 65   | 147  |
| <b>Geminocystis</b>            | 451   | 537  | 657  | 341  | 122  | 405   | 632  | 657  |
| <b>Chondrocystis</b>           | 199   | 122  | 94   | 120  | 39   | 142   | 201  | 90   |
| <b>Gloeocapsa</b>              | 108   | 112  | 69   | 60   | 33   | 88    | 98   | 248  |
| <b>Microcystis</b>             | 262   | 243  | 251  | 180  | 98   | 259   | 338  | 370  |
| <b>Cyanobacterium</b>          | 177   | 106  | 62   | 92   | 24   | 133   | 140  | 206  |
| <b>Halothece</b>               | 87    | 103  | 48   | 30   | 227  | 90    | 60   | 135  |
| <b>Candidatus Atelocyanoba</b> | 50    | 61   | 24   | 13   | 6    | 59    | 28   | 164  |
| <b>Synechococcus</b>           | 3187  | 2359 | 1838 | 1743 | 1058 | 3488  | 1938 | 1733 |
| <b>Cyanobium</b>               | 933   | 764  | 590  | 693  | 397  | 847   | 610  | 412  |
| <b>Thermosynechococcus</b>     | 209   | 125  | 86   | 96   | 65   | 167   | 102  | 130  |
| <b>Dactylococcopsis</b>        | 52    | 72   | 40   | 94   | 24   | 62    | 197  | 55   |
| <b>Leptolyngbya</b>            | 715   | 671  | 450  | 420  | 220  | 732   | 450  | 495  |
| <b>Prochlorococcus</b>         | 563   | 465  | 225  | 272  | 155  | 531   | 498  | 662  |
| <b>Pseudanabaena</b>           | 273   | 236  | 119  | 107  | 73   | 288   | 217  | 240  |

|                                |       |      |       |      |      |      |      |      |
|--------------------------------|-------|------|-------|------|------|------|------|------|
| <b>Synechocystis</b>           | 225   | 166  | 114   | 95   | 66   | 211  | 262  | 112  |
| <b>Acaryochloris</b>           | 182   | 116  | 66    | 57   | 56   | 156  | 85   | 187  |
| <b>Halomicronema</b>           | 172   | 175  | 126   | 146  | 60   | 207  | 121  | 99   |
| <b>Chamaesiphon</b>            | 150   | 159  | 106   | 92   | 48   | 155  | 109  | 90   |
| <b>Nostoc</b>                  | 1859  | 1347 | 2192  | 1277 | 522  | 1329 | 1280 | 1710 |
| <b>Anabaena</b>                | 293   | 264  | 157   | 253  | 136  | 386  | 261  | 628  |
| <b>Trichormus</b>              | 207   | 122  | 386   | 67   | 35   | 125  | 78   | 139  |
| <b>Cylindrospermum</b>         | 149   | 126  | 109   | 58   | 178  | 204  | 151  | 79   |
| <b>Calothrix</b>               | 1487  | 1136 | 1636  | 882  | 436  | 1297 | 1172 | 1345 |
| <b>Rivularia</b>               | 210   | 145  | 106   | 90   | 42   | 175  | 172  | 131  |
| <b>Microchaete</b>             | 87    | 108  | 672   | 38   | 26   | 77   | 77   | 182  |
| <b>Sphaerospermopsis</b>       | 170   | 162  | 85    | 87   | 39   | 103  | 163  | 211  |
| <b>Nodularia</b>               | 118   | 120  | 44    | 124  | 42   | 100  | 238  | 204  |
| <b>Anabaenopsis</b>            | 82    | 71   | 39    | 27   | 21   | 62   | 43   | 62   |
| <b>Dolichospermum</b>          | 63    | 68   | 45    | 116  | 25   | 71   | 67   | 80   |
| <b>Raphidiopsis</b>            | 61    | 68   | 42    | 85   | 47   | 56   | 86   | 101  |
| <b>Scytonema</b>               | 419   | 243  | 233   | 155  | 98   | 243  | 382  | 353  |
| <b>Fischerella</b>             | 279   | 256  | 192   | 127  | 71   | 246  | 372  | 248  |
| <b>Tolypothrix</b>             | 1     | 0    | 0     | 0    | 0    | 0    | 0    | 1    |
| <b>Gloeobacter</b>             | 909   | 674  | 480   | 651  | 303  | 769  | 546  | 425  |
| <b>Stanieria</b>               | 252   | 189  | 252   | 219  | 90   | 197  | 258  | 210  |
| <b>Pleurocapsa</b>             | 146   | 95   | 57    | 43   | 39   | 142  | 62   | 99   |
| <b>Chroococciopsis</b>         | 153   | 204  | 78    | 80   | 37   | 171  | 250  | 166  |
| <b>Gloeomargarita</b>          | 124   | 78   | 94    | 63   | 31   | 100  | 75   | 84   |
| <b>Meiothermus</b>             | 15916 | 1139 | 15692 | 1099 | 1700 | 2962 | 1073 | 359  |
| <b>Thermus</b>                 | 1612  | 1190 | 2043  | 1203 | 832  | 8114 | 888  | 460  |
| <b>Oceanithermus</b>           | 600   | 477  | 646   | 492  | 215  | 671  | 384  | 171  |
| <b>Marinithermus</b>           | 230   | 227  | 295   | 197  | 83   | 237  | 139  | 80   |
| <b>Deinococcus</b>             | 9056  | 7491 | 7312  | 7641 | 3375 | 8289 | 7218 | 2874 |
| <b>Truepera</b>                | 480   | 343  | 374   | 293  | 188  | 378  | 291  | 137  |
| <b>Mycoplasma</b>              | 4109  | 2552 | 2945  | 1466 | 945  | 3152 | 2260 | 3426 |
| <b>Ureaplasma</b>              | 69    | 97   | 41    | 30   | 21   | 90   | 63   | 67   |
| <b>Candidatus Hepatoplasma</b> | 41    | 36   | 20    | 18   | 6    | 65   | 39   | 48   |
| <b>Spiroplasma</b>             | 1878  | 1016 | 556   | 508  | 371  | 1437 | 998  | 1351 |
| <b>Mesoplasma</b>              | 394   | 258  | 170   | 192  | 77   | 327  | 250  | 464  |
| <b>Entomoplasma</b>            | 268   | 181  | 118   | 89   | 54   | 159  | 222  | 178  |
| <b>Acholeplasma</b>            | 1348  | 832  | 509   | 382  | 248  | 1143 | 885  | 676  |
| <b>Candidatus Phytoplasma</b>  | 213   | 118  | 66    | 63   | 51   | 155  | 104  | 142  |
| <b>Candidatus Izimaplasma</b>  | 271   | 142  | 112   | 51   | 58   | 166  | 82   | 123  |
| <b>Dehalococcoides</b>         | 1237  | 708  | 357   | 215  | 172  | 1008 | 583  | 452  |

|                                  |         |        |        |        |        |        |        |        |
|----------------------------------|---------|--------|--------|--------|--------|--------|--------|--------|
| <b>Dehalogenimonas</b>           | 375     | 258    | 232    | 130    | 93     | 442    | 179    | 130    |
| <b>Pelolinea</b>                 | 489     | 289    | 192    | 164    | 129    | 509    | 204    | 150    |
| <b>Anaerolinea</b>               | 301     | 230    | 186    | 170    | 157    | 347    | 135    | 114    |
| <b>Brevefilum</b>                | 222     | 126    | 866    | 64     | 70     | 317    | 122    | 90     |
| <b>Roseiflexus</b>               | 917     | 688    | 604    | 497    | 311    | 772    | 488    | 316    |
| <b>Chloroflexus</b>              | 396     | 270    | 239    | 205    | 143    | 352    | 178    | 211    |
| <b>Candidatus Promineofilum</b>  | 905     | 616    | 483    | 658    | 524    | 881    | 539    | 285    |
| <b>Sphaerobacter</b>             | 620     | 610    | 406    | 468    | 267    | 539    | 352    | 162    |
| <b>Thermomicrobium</b>           | 161     | 143    | 132    | 90     | 71     | 173    | 107    | 91     |
| <b>Caldilinea</b>                | 482     | 354    | 272    | 337    | 185    | 546    | 274    | 179    |
| <b>Fimbriimonas</b>              | 314     | 282    | 184    | 172    | 143    | 352    | 219    | 86     |
| <b>Chthonomonas</b>              | 172     | 131    | 53     | 48     | 35     | 152    | 60     | 53     |
| <b>Thermobaculum</b>             | 203     | 138    | 156    | 135    | 56     | 146    | 89     | 37     |
| <b>Bacteroides</b>               | 1121241 | 526894 | 316994 | 147173 | 185952 | 920958 | 176632 | 37921  |
| <b>Alistipes</b>                 | 147586  | 145580 | 115989 | 18115  | 67921  | 198666 | 35764  | 10874  |
| <b>Mucinivorans</b>              | 753     | 804    | 374    | 185    | 160    | 712    | 572    | 150    |
| <b>Prevotella</b>                | 40658   | 103659 | 27116  | 6700   | 10062  | 72625  | 17398  | 4272   |
| <b>Paraprevotella</b>            | 17797   | 14049  | 6500   | 3635   | 3731   | 11438  | 3852   | 873    |
| <b>Parabacteroides</b>           | 43726   | 44390  | 30886  | 13880  | 13407  | 158352 | 18329  | 6612   |
| <b>Tannerella</b>                | 2704    | 3290   | 1700   | 655    | 697    | 3184   | 1264   | 352    |
| <b>Odoribacter</b>               | 16654   | 17881  | 14631  | 3720   | 4250   | 24171  | 5690   | 1176   |
| <b>Butyricimonas</b>             | 15366   | 15677  | 8930   | 3422   | 5663   | 26281  | 4917   | 1299   |
| <b>Porphyromonas</b>             | 3256    | 3908   | 1961   | 892    | 946    | 17656  | 1448   | 450    |
| <b>Petrimonas</b>                | 2705    | 1811   | 2651   | 699    | 373    | 1501   | 602    | 204    |
| <b>Fermentimonas</b>             | 949     | 738    | 599    | 371    | 164    | 630    | 598    | 357    |
| <b>Barnesiella</b>               | 5059    | 8831   | 3340   | 994    | 1210   | 6253   | 1478   | 662    |
| <b>Paludibacter</b>              | 3398    | 1348   | 883    | 764    | 319    | 816    | 917    | 681    |
| <b>Muribaculum</b>               | 1963    | 3577   | 1232   | 450    | 443    | 2118   | 612    | 182    |
| <b>Proteiniphilum</b>            | 1439    | 1580   | 1082   | 469    | 298    | 1083   | 591    | 249    |
| <b>Candidatus Azobacteroides</b> | 390     | 323    | 218    | 179    | 82     | 311    | 190    | 200    |
| <b>Draconibacterium</b>          | 802     | 1059   | 698    | 615    | 220    | 691    | 835    | 447    |
| <b>Alkalitalea</b>               | 378     | 425    | 302    | 251    | 101    | 237    | 350    | 246    |
| <b>Salinivirga</b>               | 276     | 329    | 224    | 217    | 77     | 280    | 314    | 205    |
| <b>Chryseobacterium</b>          | 125535  | 146556 | 133353 | 285209 | 27541  | 58781  | 228942 | 256387 |
| <b>Flavobacterium</b>            | 71969   | 167145 | 70921  | 346394 | 66037  | 58190  | 758629 | 126960 |
| <b>Cloacibacterium</b>           | 69689   | 44001  | 208941 | 40793  | 16979  | 18882  | 60709  | 96479  |
| <b>Elizabethkingia</b>           | 9660    | 14907  | 5709   | 10325  | 1627   | 16083  | 13900  | 10159  |
| <b>Polaribacter</b>              | 5129    | 9629   | 4453   | 17973  | 2464   | 3981   | 34335  | 13932  |
| <b>Capnocytophaga</b>            | 4395    | 5582   | 4704   | 8069   | 1658   | 3654   | 12931  | 5039   |
| <b>Myroides</b>                  | 3348    | 7251   | 2061   | 6787   | 1589   | 1642   | 19141  | 4322   |

|                         |      |      |      |       |      |      |       |      |
|-------------------------|------|------|------|-------|------|------|-------|------|
| <b>Tenacibaculum</b>    | 3303 | 6497 | 3425 | 12917 | 1691 | 2719 | 24055 | 8934 |
| <b>Riemerella</b>       | 2932 | 2359 | 2071 | 3100  | 651  | 1086 | 4304  | 4572 |
| <b>Ornithobacterium</b> | 2698 | 3130 | 1361 | 1204  | 595  | 3538 | 1986  | 1412 |
| <b>Gramella</b>         | 1971 | 3184 | 2398 | 4783  | 761  | 1752 | 8284  | 2658 |
| <b>Nonlabens</b>        | 1777 | 2805 | 2192 | 5091  | 665  | 1421 | 8958  | 2956 |
| <b>Maribacter</b>       | 1692 | 3063 | 1961 | 5084  | 722  | 1578 | 9686  | 3096 |
| <b>Cellulophaga</b>     | 1530 | 3214 | 1669 | 5827  | 811  | 1399 | 12655 | 3909 |
| <b>Winogradskyella</b>  | 1521 | 2788 | 2009 | 6054  | 812  | 1301 | 9756  | 3964 |
| <b>Formosa</b>          | 1401 | 2535 | 1392 | 5378  | 696  | 1173 | 9159  | 3052 |
| <b>Lacinutrix</b>       | 1376 | 3104 | 1799 | 5156  | 774  | 1228 | 11193 | 3970 |
| <b>Aquimarina</b>       | 1347 | 2438 | 1937 | 4557  | 614  | 1177 | 8584  | 3084 |
| <b>Salegentibacter</b>  | 975  | 1730 | 986  | 2665  | 369  | 654  | 5142  | 1505 |
| <b>Lutibacter</b>       | 959  | 1884 | 892  | 3903  | 495  | 851  | 7688  | 2874 |
| <b>Dokdonia</b>         | 904  | 1441 | 809  | 2914  | 415  | 736  | 5360  | 1817 |
| <b>Olleya</b>           | 782  | 1688 | 849  | 3695  | 423  | 655  | 6929  | 2306 |
| <b>Aequorivita</b>      | 705  | 1349 | 848  | 2357  | 400  | 556  | 4461  | 1626 |
| <b>Mariniflexile</b>    | 701  | 1679 | 884  | 3153  | 415  | 668  | 7570  | 1696 |
| <b>Weeksella</b>        | 590  | 595  | 865  | 847   | 239  | 350  | 1731  | 8012 |
| <b>Zunongwangia</b>     | 575  | 794  | 491  | 1409  | 194  | 416  | 2717  | 836  |
| <b>Kordia</b>           | 568  | 1411 | 654  | 3013  | 322  | 589  | 4765  | 1518 |
| <b>Arenibacter</b>      | 520  | 611  | 308  | 1033  | 155  | 290  | 1222  | 528  |
| <b>Siansivirga</b>      | 519  | 986  | 483  | 1840  | 240  | 460  | 4187  | 1212 |
| <b>Seonamhaeicola</b>   | 489  | 844  | 542  | 1995  | 283  | 464  | 3211  | 1164 |
| <b>Algibacter</b>       | 489  | 931  | 420  | 1897  | 255  | 444  | 3821  | 1093 |
| <b>Muricauda</b>        | 483  | 880  | 598  | 1274  | 195  | 455  | 2690  | 789  |
| <b>Flavivirga</b>       | 450  | 721  | 434  | 1457  | 196  | 365  | 2179  | 838  |
| <b>Wenyngzhuangia</b>   | 438  | 841  | 405  | 1701  | 209  | 365  | 2917  | 1224 |
| <b>Tamlana</b>          | 433  | 848  | 418  | 1678  | 196  | 369  | 2814  | 1112 |
| <b>Apibacter</b>        | 407  | 375  | 301  | 433   | 98   | 259  | 816   | 1116 |
| <b>Gillisia</b>         | 385  | 575  | 249  | 1197  | 120  | 241  | 1937  | 838  |
| <b>Euzebyella</b>       | 337  | 471  | 422  | 903   | 134  | 277  | 1348  | 493  |
| <b>Zobellia</b>         | 326  | 442  | 323  | 608   | 104  | 209  | 844   | 333  |
| <b>Croceibacter</b>     | 312  | 505  | 289  | 875   | 124  | 236  | 1442  | 791  |
| <b>Psychroflexus</b>    | 290  | 451  | 299  | 873   | 121  | 232  | 1552  | 821  |
| <b>Robiginitalea</b>    | 270  | 389  | 236  | 219   | 107  | 269  | 290   | 89   |
| <b>Flagellimonas</b>    | 252  | 440  | 232  | 633   | 111  | 347  | 1268  | 395  |
| <b>Sediminicola</b>     | 200  | 388  | 250  | 919   | 121  | 190  | 1347  | 323  |
| <b>Aureitalea</b>       | 181  | 271  | 198  | 409   | 72   | 142  | 526   | 267  |
| <b>Gilvibacter</b>      | 180  | 305  | 201  | 463   | 80   | 152  | 801   | 209  |
| <b>Muriicola</b>        | 154  | 229  | 138  | 356   | 63   | 136  | 717   | 229  |

|                                |      |       |      |      |      |      |       |      |
|--------------------------------|------|-------|------|------|------|------|-------|------|
| <b>Fluviicola</b>              | 562  | 986   | 788  | 2898 | 328  | 486  | 3545  | 1192 |
| <b>Blattabacterium</b>         | 485  | 470   | 330  | 855  | 152  | 361  | 1237  | 851  |
| <b>Owenweeksia</b>             | 320  | 418   | 620  | 585  | 111  | 291  | 738   | 324  |
| <b>Candidatus Sulcia</b>       | 109  | 97    | 48   | 116  | 21   | 38   | 84    | 177  |
| <b>Candidatus Walczuchella</b> | 15   | 10    | 19   | 26   | 5    | 22   | 27    | 22   |
| <b>Ichthyobacterium</b>        | 70   | 76    | 54   | 132  | 17   | 53   | 164   | 158  |
| <b>Runella</b>                 | 2566 | 1732  | 962  | 1030 | 254  | 577  | 1487  | 891  |
| <b>Spirosoma</b>               | 2232 | 2576  | 1329 | 1388 | 605  | 1726 | 2058  | 795  |
| <b>Dyadobacter</b>             | 1401 | 1547  | 530  | 589  | 517  | 704  | 710   | 193  |
| <b>Fibrella</b>                | 933  | 1194  | 712  | 579  | 468  | 930  | 623   | 371  |
| <b>Cytophaga</b>               | 666  | 806   | 371  | 474  | 218  | 351  | 684   | 385  |
| <b>Leadbetterella</b>          | 546  | 675   | 687  | 866  | 199  | 291  | 1546  | 521  |
| <b>Pseudarcicella</b>          | 341  | 558   | 288  | 851  | 100  | 191  | 548   | 341  |
| <b>Arcticibacterium</b>        | 294  | 353   | 216  | 545  | 103  | 275  | 781   | 302  |
| <b>Hymenobacter</b>            | 5759 | 6828  | 3762 | 3421 | 2231 | 5836 | 3263  | 2055 |
| <b>Pontibacter</b>             | 1304 | 1480  | 1213 | 704  | 323  | 1234 | 676   | 391  |
| <b>Rufibacter</b>              | 1100 | 1236  | 656  | 628  | 284  | 985  | 772   | 443  |
| <b>Echinicola</b>              | 632  | 730   | 466  | 844  | 195  | 601  | 1097  | 336  |
| <b>Cyclobacterium</b>          | 591  | 801   | 1098 | 573  | 215  | 568  | 1865  | 651  |
| <b>Algoriphagus</b>            | 576  | 679   | 382  | 859  | 185  | 558  | 1262  | 408  |
| <b>Belliella</b>               | 474  | 1056  | 582  | 1554 | 308  | 545  | 5166  | 861  |
| <b>Aquiflexum</b>              | 318  | 426   | 292  | 402  | 114  | 290  | 523   | 299  |
| <b>Flammeovirga</b>            | 752  | 962   | 539  | 1332 | 218  | 595  | 2050  | 1301 |
| <b>Marivirga</b>               | 306  | 372   | 265  | 387  | 76   | 190  | 657   | 421  |
| <b>Chryseolinea</b>            | 591  | 739   | 458  | 296  | 223  | 510  | 342   | 205  |
| <b>Persicobacter</b>           | 398  | 478   | 283  | 356  | 87   | 382  | 351   | 252  |
| <b>Bernardetia</b>             | 351  | 588   | 401  | 581  | 132  | 296  | 1367  | 775  |
| <b>Candidatus Cardinium</b>    | 122  | 82    | 325  | 33   | 22   | 84   | 100   | 53   |
| <b>Candidatus Amoebophilus</b> | 66   | 60    | 31   | 36   | 26   | 46   | 141   | 66   |
| <b>Sphingobacterium</b>        | 5795 | 5867  | 2095 | 5339 | 1540 | 2236 | 10235 | 3261 |
| <b>Pedobacter</b>              | 5788 | 14743 | 4638 | 5027 | 2239 | 3295 | 9142  | 3461 |
| <b>Mucilaginibacter</b>        | 3256 | 4421  | 2758 | 2628 | 1039 | 2355 | 3565  | 1508 |
| <b>Pseudopedobacter</b>        | 656  | 855   | 2169 | 1136 | 274  | 458  | 1092  | 536  |
| <b>Solitalea</b>               | 570  | 669   | 523  | 1030 | 157  | 469  | 1193  | 621  |
| <b>Niabella</b>                | 3011 | 3511  | 1921 | 1448 | 675  | 1296 | 2238  | 683  |
| <b>Chitinophaga</b>            | 2044 | 3027  | 2278 | 1391 | 651  | 1241 | 2105  | 761  |
| <b>Niastella</b>               | 1190 | 2089  | 1464 | 648  | 549  | 728  | 842   | 429  |
| <b>Arachidicoccus</b>          | 1155 | 1713  | 989  | 1031 | 332  | 815  | 1963  | 1167 |
| <b>Pseudoflavitalea</b>        | 1153 | 2363  | 1107 | 759  | 344  | 723  | 1080  | 241  |
| <b>Filimonas</b>               | 902  | 1622  | 1045 | 843  | 311  | 578  | 1206  | 277  |

|                                      |        |        |       |       |       |        |        |       |
|--------------------------------------|--------|--------|-------|-------|-------|--------|--------|-------|
| <b>Flavisolibacter</b>               | 602    | 1033   | 683   | 413   | 170   | 392    | 529    | 258   |
| <b>Rhodothermus</b>                  | 842    | 897    | 509   | 588   | 307   | 931    | 482    | 283   |
| <b>Salinibacter</b>                  | 555    | 674    | 386   | 384   | 214   | 558    | 362    | 175   |
| <b>Haliscomenobacter</b>             | 709    | 769    | 561   | 580   | 218   | 526    | 1257   | 467   |
| <b>Saprospira</b>                    | 149    | 165    | 779   | 151   | 63    | 125    | 117    | 126   |
| <b>Chlorobium</b>                    | 1070   | 840    | 524   | 522   | 282   | 1134   | 904    | 433   |
| <b>Pelodictyon</b>                   | 428    | 383    | 257   | 258   | 142   | 434    | 428    | 155   |
| <b>Chlorobaculum</b>                 | 1242   | 1071   | 708   | 625   | 368   | 1253   | 637    | 422   |
| <b>Prosthecochloris</b>              | 760    | 672    | 551   | 346   | 185   | 948    | 402    | 296   |
| <b>Chloroherpeton</b>                | 239    | 168    | 81    | 77    | 43    | 219    | 86     | 77    |
| <b>Ignavibacterium</b>               | 336    | 209    | 379   | 171   | 70    | 247    | 345    | 182   |
| <b>Melioribacter</b>                 | 167    | 122    | 120   | 67    | 40    | 177    | 142    | 95    |
| <b>Candidatus Cyclonatronum</b>      | 304    | 248    | 152   | 193   | 62    | 325    | 350    | 174   |
| <b>Gemmatirosa</b>                   | 1513   | 2095   | 1024  | 1432  | 756   | 1327   | 1035   | 413   |
| <b>Gemmatimonas</b>                  | 1295   | 3112   | 938   | 1054  | 545   | 838    | 1110   | 420   |
| <b>Fibrobacter</b>                   | 460    | 407    | 203   | 156   | 124   | 590    | 245    | 105   |
| <b>Candidatus Cloacimonas</b>        | 193    | 152    | 72    | 45    | 42    | 170    | 78     | 252   |
| <b>Akkermansia</b>                   | 175455 | 101738 | 30092 | 34977 | 53754 | 204761 | 104285 | 32366 |
| <b>Verrucomicrobium</b>              | 1624   | 1176   | 803   | 722   | 555   | 1186   | 673    | 537   |
| <b>Opitutus</b>                      | 2054   | 1747   | 990   | 1179  | 817   | 1416   | 970    | 424   |
| <b>Lacunisphaera</b>                 | 1007   | 625    | 595   | 484   | 381   | 628    | 373    | 250   |
| <b>Ereboglobus</b>                   | 676    | 473    | 314   | 303   | 194   | 595    | 282    | 185   |
| <b>Coraliomargarita</b>              | 138    | 140    | 58    | 62    | 35    | 117    | 77     | 52    |
| <b>Methylacidiphilum</b>             | 196    | 98     | 64    | 67    | 34    | 130    | 99     | 47    |
| <b>Candidatus Xiphinematobium</b>    | 51     | 36     | 18    | 12    | 13    | 50     | 20     | 16    |
| <b>Planctomyces</b>                  | 2293   | 2157   | 1104  | 1474  | 1630  | 1474   | 1371   | 590   |
| <b>Pirellula</b>                     | 367    | 260    | 245   | 168   | 261   | 233    | 146    | 97    |
| <b>Fuerstia</b>                      | 284    | 194    | 632   | 137   | 117   | 205    | 153    | 131   |
| <b>Rubinisphaera</b>                 | 274    | 204    | 158   | 121   | 141   | 276    | 150    | 180   |
| <b>Thermogutta</b>                   | 239    | 186    | 121   | 132   | 76    | 261    | 101    | 80    |
| <b>Rhodopirellula</b>                | 210    | 197    | 131   | 245   | 119   | 197    | 122    | 110   |
| <b>Planctopirus</b>                  | 199    | 165    | 106   | 74    | 95    | 152    | 110    | 112   |
| <b>Paludisphaera</b>                 | 1364   | 1045   | 654   | 862   | 821   | 819    | 818    | 306   |
| <b>Singulisphaera</b>                | 647    | 551    | 350   | 378   | 431   | 338    | 347    | 169   |
| <b>Isosphaera</b>                    | 278    | 212    | 207   | 182   | 167   | 235    | 187    | 105   |
| <b>Gemmata</b>                       | 2068   | 1392   | 1227  | 1004  | 1409  | 1300   | 1002   | 675   |
| <b>Phycisphaera</b>                  | 762    | 681    | 506   | 519   | 361   | 677    | 407    | 209   |
| <b>Sedimentisphaera</b>              | 316    | 197    | 118   | 87    | 70    | 341    | 302    | 143   |
| <b>Candidatus Kuenenia</b>           | 159    | 186    | 82    | 75    | 48    | 154    | 73     | 103   |
| <b>Candidatus Protochlamydomonas</b> | 1024   | 301    | 342   | 61    | 154   | 201    | 131    | 128   |

|                              |       |      |      |      |      |      |      |      |
|------------------------------|-------|------|------|------|------|------|------|------|
| <b>Parachlamydia</b>         | 94    | 44   | 22   | 81   | 40   | 47   | 49   | 36   |
| <b>Neochlamydia</b>          | 64    | 37   | 30   | 14   | 13   | 27   | 32   | 24   |
| <b>Simkania</b>              | 196   | 51   | 23   | 99   | 44   | 80   | 79   | 53   |
| <b>Waddlia</b>               | 64    | 45   | 38   | 34   | 22   | 54   | 49   | 98   |
| <b>Chlamydia</b>             | 692   | 354  | 571  | 300  | 200  | 521  | 369  | 573  |
| <b>Kiritimatiella</b>        | 416   | 363  | 248  | 238  | 158  | 510  | 249  | 149  |
| <b>Fusobacterium</b>         | 22106 | 3325 | 2528 | 1758 | 1437 | 5676 | 4060 | 5941 |
| <b>Ilyobacter</b>            | 254   | 212  | 96   | 58   | 57   | 271  | 104  | 215  |
| <b>Sebaldella</b>            | 3088  | 338  | 166  | 163  | 98   | 529  | 246  | 7971 |
| <b>Leptotrichia</b>          | 1091  | 756  | 390  | 334  | 244  | 1099 | 536  | 5988 |
| <b>Sneathia</b>              | 369   | 233  | 70   | 120  | 292  | 340  | 227  | 798  |
| <b>Streptobacillus</b>       | 263   | 216  | 68   | 139  | 64   | 224  | 218  | 1345 |
| <b>Treponema</b>             | 6149  | 2703 | 1745 | 1592 | 916  | 5707 | 2218 | 1180 |
| <b>Sphaerochaeta</b>         | 1090  | 530  | 358  | 288  | 204  | 1270 | 450  | 269  |
| <b>Spirochaeta</b>           | 716   | 521  | 300  | 311  | 172  | 723  | 348  | 140  |
| <b>Salinispira</b>           | 272   | 228  | 86   | 64   | 53   | 310  | 104  | 56   |
| <b>Sediminispirochaeta</b>   | 272   | 151  | 125  | 122  | 81   | 376  | 151  | 69   |
| <b>Borrelia</b>              | 410   | 503  | 139  | 224  | 115  | 319  | 327  | 392  |
| <b>Borreliella</b>           | 318   | 190  | 98   | 124  | 74   | 270  | 154  | 314  |
| <b>Brachyspira</b>           | 1287  | 885  | 455  | 517  | 283  | 1348 | 981  | 975  |
| <b>Leptospira</b>            | 862   | 864  | 625  | 818  | 292  | 884  | 794  | 810  |
| <b>Turneriella</b>           | 242   | 138  | 260  | 97   | 70   | 206  | 198  | 87   |
| <b>Cloacibacillus</b>        | 3841  | 1114 | 691  | 415  | 744  | 8452 | 1671 | 325  |
| <b>Aminomonas</b>            | 1058  | 335  | 212  | 263  | 141  | 663  | 313  | 156  |
| <b>Jonquetella</b>           | 489   | 229  | 143  | 136  | 151  | 458  | 244  | 51   |
| <b>Thermanaerovibrio</b>     | 316   | 225  | 156  | 150  | 100  | 551  | 177  | 84   |
| <b>Acetomicrobium</b>        | 245   | 93   | 80   | 70   | 28   | 154  | 84   | 40   |
| <b>Aminobacterium</b>        | 163   | 62   | 58   | 37   | 31   | 128  | 107  | 43   |
| <b>Thermovirga</b>           | 108   | 55   | 27   | 33   | 23   | 103  | 35   | 36   |
| <b>Terriglobus</b>           | 966   | 828  | 563  | 634  | 376  | 974  | 590  | 299  |
| <b>Granulicella</b>          | 863   | 670  | 887  | 529  | 301  | 753  | 518  | 271  |
| <b>Acidobacterium</b>        | 552   | 488  | 382  | 324  | 205  | 512  | 339  | 170  |
| <b>Candidatus Koribacter</b> | 454   | 395  | 307  | 313  | 167  | 443  | 240  | 140  |
| <b>Candidatus Solibacter</b> | 844   | 825  | 613  | 528  | 378  | 765  | 491  | 262  |
| <b>Luteitalea</b>            | 1326  | 2013 | 946  | 1201 | 1374 | 1099 | 1159 | 462  |
| <b>Chloracidobacterium</b>   | 326   | 292  | 176  | 210  | 143  | 299  | 204  | 129  |
| <b>Fervidobacterium</b>      | 609   | 356  | 424  | 216  | 346  | 545  | 226  | 165  |
| <b>Thermosipho</b>           | 280   | 201  | 237  | 110  | 89   | 319  | 282  | 209  |
| <b>Thermotoga</b>            | 489   | 320  | 182  | 140  | 306  | 446  | 347  | 153  |
| <b>Pseudothermotoga</b>      | 301   | 160  | 79   | 184  | 89   | 267  | 87   | 86   |

|                                  |         |         |        |        |          |         |        |        |
|----------------------------------|---------|---------|--------|--------|----------|---------|--------|--------|
| <b>Marinitoga</b>                | 184     | 173     | 83     | 48     | 40       | 225     | 86     | 178    |
| <b>Defluviitoga</b>              | 137     | 106     | 3054   | 59     | 39       | 123     | 122    | 84     |
| <b>Petrotoga</b>                 | 122     | 83      | 60     | 32     | 30       | 165     | 66     | 84     |
| <b>Mesotoga</b>                  | 192     | 72      | 62     | 42     | 29       | 179     | 57     | 23     |
| <b>Kosmotoga</b>                 | 181     | 79      | 92     | 27     | 55       | 160     | 92     | 129    |
| <b>Candidatus Saccharimona</b>   | 621     | 514     | 623    | 809    | 502      | 449     | 525    | 120    |
| <b>Candidatus Babela</b>         | 91      | 54      | 22     | 13     | 20       | 42      | 24     | 58     |
| <b>Candidatus Bipolaricaulis</b> | 118     | 124     | 87     | 82     | 52       | 146     | 90     | 44     |
| <b>Vampirococcus</b>             | 187     | 107     | 93     | 73     | 33       | 221     | 87     | 49     |
| <b>Nitrospira</b>                | 1392    | 1742    | 5257   | 1374   | 630      | 1361    | 895    | 555    |
| <b>Leptospirillum</b>            | 181     | 174     | 100    | 126    | 69       | 213     | 91     | 136    |
| <b>Thermodesulfovibrio</b>       | 134     | 90      | 102    | 45     | 29       | 139     | 62     | 63     |
| <b>Thermocrinis</b>              | 177     | 66      | 41     | 35     | 28       | 148     | 47     | 45     |
| <b>Hydrogenobaculum</b>          | 100     | 85      | 15     | 40     | 15       | 80      | 58     | 125    |
| <b>Aquifex</b>                   | 86      | 86      | 26     | 24     | 8        | 111     | 38     | 23     |
| <b>Hydrogenobacter</b>           | 32      | 26      | 20     | 6      | 13       | 34      | 17     | 26     |
| <b>Sulfurihydrogenibium</b>      | 205     | 187     | 117    | 97     | 122      | 214     | 274    | 138    |
| <b>Persephonella</b>             | 56      | 48      | 14     | 11     | 23       | 81      | 44     | 34     |
| <b>Thermosulfidibacter</b>       | 126     | 114     | 66     | 96     | 16       | 115     | 61     | 22     |
| <b>Desulfurobacterium</b>        | 171     | 72      | 46     | 48     | 26       | 148     | 45     | 89     |
| <b>Thermovibrio</b>              | 76      | 57      | 72     | 25     | 14       | 113     | 36     | 28     |
| <b>Geovibrio</b>                 | 256     | 185     | 106    | 104    | 58       | 357     | 156    | 67     |
| <b>Calditerrivibrio</b>          | 233     | 234     | 109    | 57     | 67       | 222     | 104    | 63     |
| <b>Denitrovibrio</b>             | 166     | 117     | 40     | 30     | 42       | 187     | 71     | 72     |
| <b>Deferribacter</b>             | 146     | 103     | 71     | 59     | 41       | 171     | 66     | 259    |
| <b>Flexistipes</b>               | 96      | 211     | 487    | 37     | 22       | 106     | 78     | 85     |
| <b>Endomicrobium</b>             | 249     | 127     | 58     | 66     | 51       | 204     | 96     | 52     |
| <b>Elusimicrobium</b>            | 103     | 64      | 43     | 30     | 35       | 104     | 59     | 35     |
| <b>Thermodesulfobacterium</b>    | 162     | 116     | 61     | 219    | 32       | 100     | 188    | 126    |
| <b>Thermodesulfatator</b>        | 108     | 118     | 53     | 33     | 20       | 124     | 63     | 50     |
| <b>Caldimicrobium</b>            | 71      | 31      | 64     | 19     | 19       | 40      | 37     | 50     |
| <b>Desulfurispirillum</b>        | 334     | 250     | 126    | 207    | 79       | 290     | 154    | 117    |
| <b>Caldithrix</b>                | 308     | 255     | 214    | 108    | 54       | 256     | 169    | 110    |
| <b>Dictyoglomus</b>              | 247     | 153     | 130    | 171    | 51       | 274     | 223    | 165    |
| <b>Caldisericum</b>              | 125     | 40      | 28     | 17     | 17       | 74      | 44     | 72     |
| <b>Coprothermobacter</b>         | 62      | 18      | 21     | 24     | 7        | 42      | 11     | 17     |
| <b>Homo</b>                      | 1861572 | 1839757 | 197372 | 768172 | 10254514 | 1374974 | 623585 | 154989 |
| <b>Halorubrum</b>                | 1112    | 1080    | 870    | 1197   | 784      | 869     | 847    | 334    |
| <b>Salinigranum</b>              | 284     | 274     | 200    | 227    | 159      | 226     | 214    | 96     |
| <b>Halopenitus</b>               | 197     | 175     | 145    | 193    | 120      | 196     | 143    | 52     |



|                             |      |     |     |     |     |      |     |      |
|-----------------------------|------|-----|-----|-----|-----|------|-----|------|
| <b>Halohasta</b>            | 83   | 105 | 81  | 94  | 46  | 84   | 60  | 41   |
| <b>Haloferax</b>            | 582  | 552 | 497 | 559 | 278 | 537  | 374 | 163  |
| <b>Haloplanus</b>           | 458  | 405 | 281 | 572 | 277 | 347  | 346 | 168  |
| <b>Halogeometricum</b>      | 95   | 78  | 49  | 92  | 42  | 80   | 49  | 28   |
| <b>Haloquadratum</b>        | 95   | 54  | 28  | 19  | 20  | 37   | 21  | 35   |
| <b>Haloarcula</b>           | 439  | 375 | 321 | 295 | 204 | 389  | 259 | 164  |
| <b>Natronomonas</b>         | 397  | 264 | 167 | 269 | 160 | 230  | 208 | 121  |
| <b>Halorhabdus</b>          | 282  | 268 | 185 | 308 | 158 | 214  | 212 | 85   |
| <b>Halomicrobium</b>        | 220  | 159 | 153 | 191 | 127 | 192  | 145 | 55   |
| <b>Halorientalis</b>        | 184  | 191 | 169 | 261 | 172 | 209  | 159 | 71   |
| <b>Halobacterium</b>        | 692  | 613 | 581 | 632 | 379 | 509  | 443 | 205  |
| <b>Halalkalicoccus</b>      | 211  | 168 | 127 | 215 | 87  | 153  | 111 | 48   |
| <b>Halorussus</b>           | 175  | 151 | 180 | 132 | 93  | 139  | 116 | 63   |
| <b>Halodesulfurarchaeum</b> | 130  | 49  | 86  | 74  | 40  | 114  | 63  | 40   |
| <b>Halanaeroarchaeum</b>    | 68   | 79  | 61  | 54  | 33  | 43   | 64  | 27   |
| <b>Haloterrigena</b>        | 409  | 404 | 274 | 486 | 237 | 276  | 341 | 152  |
| <b>Natronolimnobius</b>     | 353  | 397 | 317 | 299 | 213 | 293  | 312 | 131  |
| <b>Natrinema</b>            | 344  | 331 | 256 | 310 | 241 | 264  | 303 | 119  |
| <b>Natronococcus</b>        | 230  | 209 | 216 | 284 | 163 | 135  | 147 | 73   |
| <b>Halopiger</b>            | 220  | 283 | 152 | 291 | 137 | 168  | 173 | 66   |
| <b>Salinarchaeum</b>        | 202  | 158 | 147 | 157 | 119 | 180  | 162 | 52   |
| <b>Halobiforma</b>          | 200  | 185 | 215 | 341 | 166 | 203  | 188 | 81   |
| <b>Natronobacterium</b>     | 178  | 110 | 96  | 109 | 80  | 86   | 86  | 36   |
| <b>Natrialba</b>            | 145  | 117 | 80  | 87  | 81  | 113  | 110 | 44   |
| <b>Halostagnicola</b>       | 144  | 129 | 146 | 100 | 73  | 147  | 96  | 53   |
| <b>Methanosarcina</b>       | 1073 | 812 | 475 | 454 | 331 | 1242 | 850 | 1159 |
| <b>Methanococcoides</b>     | 148  | 89  | 72  | 59  | 48  | 133  | 66  | 35   |
| <b>Methanohalophilus</b>    | 140  | 67  | 55  | 45  | 40  | 142  | 59  | 42   |
| <b>Methanlobus</b>          | 76   | 57  | 29  | 25  | 27  | 77   | 41  | 26   |
| <b>Methanomethylovorans</b> | 58   | 75  | 27  | 56  | 16  | 70   | 57  | 35   |
| <b>Methanosalsum</b>        | 58   | 40  | 26  | 16  | 6   | 48   | 38  | 44   |
| <b>Methanohalobium</b>      | 41   | 23  | 18  | 13  | 16  | 42   | 19  | 9    |
| <b>Methanothrix</b>         | 362  | 185 | 107 | 212 | 614 | 356  | 124 | 942  |
| <b>Methanoculleus</b>       | 403  | 635 | 278 | 273 | 301 | 415  | 209 | 107  |
| <b>Methanofollis</b>        | 98   | 103 | 80  | 73  | 75  | 115  | 109 | 32   |
| <b>Methanolacinia</b>       | 94   | 105 | 37  | 46  | 28  | 142  | 54  | 14   |
| <b>Methanoplanus</b>        | 86   | 51  | 59  | 29  | 12  | 72   | 91  | 26   |
| <b>Methanoregula</b>        | 225  | 114 | 119 | 101 | 155 | 254  | 101 | 92   |
| <b>Methanosphaerula</b>     | 76   | 95  | 51  | 35  | 36  | 102  | 52  | 327  |
| <b>Methanolinea</b>         | 71   | 38  | 28  | 62  | 33  | 57   | 23  | 14   |

|                                          |      |      |      |      |      |       |       |      |
|------------------------------------------|------|------|------|------|------|-------|-------|------|
| <b>Methanocorpusculum</b>                | 124  | 73   | 52   | 90   | 17   | 172   | 67    | 48   |
| <b>Methanospirillum</b>                  | 49   | 66   | 14   | 50   | 43   | 40    | 27    | 34   |
| <b>Methanocella</b>                      | 386  | 273  | 194  | 161  | 172  | 347   | 223   | 102  |
| <b>Methanobrevibacter</b>                | 2632 | 4260 | 2937 | 2841 | 9933 | 25590 | 37895 | 7644 |
| <b>Methanobacterium</b>                  | 571  | 348  | 242  | 426  | 727  | 844   | 466   | 784  |
| <b>Methanosphaera</b>                    | 176  | 128  | 51   | 60   | 44   | 238   | 182   | 130  |
| <b>Methanothermobacter</b>               | 105  | 82   | 33   | 85   | 43   | 141   | 58    | 79   |
| <b>Methanothermus</b>                    | 37   | 17   | 12   | 8    | 7    | 38    | 20    | 21   |
| <b>Methanococcus</b>                     | 422  | 279  | 385  | 157  | 105  | 460   | 415   | 382  |
| <b>Methanothermococcus</b>               | 55   | 21   | 11   | 13   | 12   | 31    | 38    | 19   |
| <b>Methanocaldococcus</b>                | 208  | 152  | 69   | 180  | 53   | 168   | 312   | 234  |
| <b>Methanotorris</b>                     | 29   | 18   | 13   | 6    | 9    | 38    | 25    | 61   |
| <b>Thermococcus</b>                      | 1136 | 934  | 576  | 432  | 330  | 1428  | 551   | 400  |
| <b>Pyrococcus</b>                        | 137  | 80   | 64   | 68   | 45   | 157   | 80    | 83   |
| <b>Palaeococcus</b>                      | 39   | 35   | 13   | 23   | 7    | 37    | 25    | 28   |
| <b>Methanomassiliicoccus</b>             | 393  | 126  | 25   | 22   | 33   | 253   | 162   | 9    |
| <b>Candidatus Methanoplasma</b>          | 30   | 16   | 14   | 13   | 11   | 32    | 12    | 5    |
| <b>Candidatus Methanomethanohalobium</b> | 69   | 95   | 43   | 42   | 17   | 160   | 52    | 11   |
| <b>Picrophilus</b>                       | 46   | 24   | 15   | 14   | 12   | 33    | 44    | 13   |
| <b>Thermoplasma</b>                      | 34   | 23   | 16   | 11   | 9    | 23    | 14    | 28   |
| <b>Cuniculiplasma</b>                    | 29   | 44   | 11   | 14   | 6    | 50    | 22    | 49   |
| <b>Ferroplasma</b>                       | 14   | 15   | 41   | 8    | 11   | 95    | 9     | 20   |
| <b>Aciduliprofundum</b>                  | 57   | 34   | 20   | 19   | 15   | 61    | 75    | 22   |
| <b>Archaeoglobus</b>                     | 103  | 69   | 43   | 46   | 34   | 145   | 60    | 57   |
| <b>Geoglobus</b>                         | 60   | 50   | 48   | 57   | 27   | 79    | 24    | 20   |
| <b>Ferroglobus</b>                       | 22   | 24   | 7    | 8    | 4    | 19    | 9     | 5    |
| <b>Methanopyrus</b>                      | 22   | 30   | 12   | 51   | 10   | 33    | 10    | 6    |
| <b>Sulfolobus</b>                        | 107  | 74   | 69   | 65   | 28   | 91    | 61    | 123  |
| <b>Sulfodiicoccus</b>                    | 81   | 31   | 11   | 16   | 11   | 17    | 42    | 8    |
| <b>Acidianus</b>                         | 77   | 91   | 28   | 48   | 34   | 86    | 97    | 81   |
| <b>Metallosphaera</b>                    | 55   | 37   | 45   | 16   | 13   | 56    | 29    | 26   |
| <b>Sulfurisphaera</b>                    | 49   | 40   | 12   | 19   | 9    | 51    | 28    | 38   |
| <b>Saccharolobus</b>                     | 18   | 20   | 19   | 13   | 6    | 36    | 8     | 23   |
| <b>Pyrobaculum</b>                       | 75   | 50   | 27   | 94   | 26   | 83    | 43    | 36   |
| <b>Thermoproteus</b>                     | 55   | 39   | 47   | 25   | 14   | 47    | 38    | 26   |
| <b>Vulcanisaeta</b>                      | 36   | 17   | 2    | 14   | 9    | 38    | 14    | 50   |
| <b>Caldivirga</b>                        | 21   | 14   | 15   | 5    | 1    | 9     | 2     | 6    |
| <b>Thermofilum</b>                       | 71   | 64   | 266  | 35   | 40   | 74    | 35    | 32   |
| <b>Staphylothermus</b>                   | 31   | 18   | 8    | 3    | 3    | 23    | 12    | 19   |
| <b>Desulfurococcus</b>                   | 27   | 21   | 12   | 3    | 4    | 23    | 21    | 6    |

|                                    |       |     |     |      |      |     |     |     |
|------------------------------------|-------|-----|-----|------|------|-----|-----|-----|
| <b>Ignicoccus</b>                  | 19    | 15  | 10  | 13   | 7    | 35  | 19  | 8   |
| <b>Thermogladius</b>               | 12    | 13  | 11  | 12   | 3    | 12  | 12  | 23  |
| <b>Thermosphaera</b>               | 6     | 7   | 1   | 7    | 0    | 6   | 3   | 11  |
| <b>Pyrodictium</b>                 | 38    | 21  | 11  | 11   | 13   | 27  | 15  | 9   |
| <b>Pyrolobus</b>                   | 25    | 26  | 14  | 8    | 2    | 20  | 4   | 3   |
| <b>Hyperthermus</b>                | 18    | 9   | 51  | 11   | 3    | 22  | 4   | 32  |
| <b>Acidilobus</b>                  | 46    | 61  | 22  | 31   | 24   | 58  | 41  | 19  |
| <b>Caldisphaera</b>                | 22    | 18  | 11  | 14   | 14   | 22  | 11  | 51  |
| <b>Candidatus Nitrosotenuis</b>    | 135   | 91  | 33  | 25   | 24   | 52  | 33  | 17  |
| <b>Candidatus Nitrosopelagicus</b> | 24    | 10  | 18  | 2    | 7    | 32  | 12  | 44  |
| <b>Nitrosopumilus</b>              | 54    | 51  | 16  | 31   | 17   | 62  | 28  | 83  |
| <b>Candidatus Nitrosomarinum</b>   | 22    | 23  | 15  | 15   | 11   | 21  | 19  | 49  |
| <b>Nitrososphaera</b>              | 58    | 43  | 59  | 18   | 36   | 52  | 28  | 21  |
| <b>Candidatus Nitrosocaldus</b>    | 5     | 10  | 6   | 21   | 1    | 8   | 2   | 7   |
| <b>Candidatus Korarchaeum</b>      | 10    | 14  | 15  | 5    | 1    | 10  | 6   | 5   |
| <b>Candidatus Mancarchaeum</b>     | 8     | 16  | 11  | 8    | 4    | 18  | 14  | 10  |
| <b>Vequintavirus</b>               | 21943 | 962 | 218 | 206  | 428  | 388 | 352 | 166 |
| <b>Certrevirus</b>                 | 6     | 2   | 4   | 5    | 1    | 4   | 6   | 4   |
| <b>Seunavirus</b>                  | 6     | 5   | 5   | 0    | 12   | 3   | 4   | 13  |
| <b>Felixounavirus</b>              | 3121  | 273 | 116 | 4181 | 1398 | 210 | 407 | 72  |
| <b>Mooglevirus</b>                 | 309   | 3   | 4   | 37   | 3    | 10  | 6   | 4   |
| <b>Suspivirus</b>                  | 29    | 3   | 1   | 5    | 1    | 1   | 3   | 0   |
| <b>Kolesnikovirus</b>              | 3     | 10  | 7   | 6    | 6    | 7   | 9   | 1   |
| <b>Asteriusvirus</b>               | 711   | 13  | 5   | 12   | 24   | 16  | 20  | 34  |
| <b>Bixzunavirus</b>                | 353   | 36  | 11  | 19   | 27   | 51  | 16  | 7   |
| <b>Obolenskvirus</b>               | 230   | 53  | 82  | 117  | 460  | 92  | 146 | 118 |
| <b>Tequatrovirus</b>               | 24    | 273 | 11  | 158  | 11   | 300 | 36  | 83  |
| <b>Mosigvirus</b>                  | 7     | 11  | 1   | 0    | 2    | 73  | 222 | 14  |
| <b>Dhakavirus</b>                  | 7     | 1   | 2   | 1    | 7    | 70  | 5   | 4   |
| <b>Schizotequatrovirus</b>         | 6     | 4   | 10  | 3    | 2    | 13  | 6   | 5   |
| <b>Gaprivervirus</b>               | 5     | 7   | 0   | 0    | 0    | 12  | 2   | 6   |
| <b>Jiaodavirus</b>                 | 4     | 1   | 0   | 1    | 1    | 29  | 10  | 8   |
| <b>Slopekvirus</b>                 | 2     | 1   | 1   | 1    | 0    | 0   | 5   | 17  |
| <b>Karamvirus</b>                  | 1     | 1   | 0   | 1    | 1    | 3   | 0   | 7   |
| <b>Moonvirus</b>                   | 1     | 1   | 2   | 0    | 2    | 36  | 3   | 6   |
| <b>Gelderlandvirus</b>             | 1     | 2   | 3   | 47   | 1    | 21  | 6   | 13  |
| <b>Pbunavirus</b>                  | 160   | 16  | 2   | 25   | 6    | 26  | 6   | 8   |
| <b>Mieseafarmvirus</b>             | 36    | 10  | 3   | 21   | 110  | 16  | 51  | 24  |
| <b>Peduovirus</b>                  | 20    | 34  | 7   | 25   | 12   | 17  | 4   | 18  |
| <b>Hpunavirus</b>                  | 11    | 4   | 10  | 5    | 3    | 13  | 8   | 76  |

|                         |      |      |     |    |     |     |     |    |
|-------------------------|------|------|-----|----|-----|-----|-----|----|
| <b>Muvirus</b>          | 30   | 0    | 0   | 0  | 1   | 1   | 29  | 0  |
| <b>Eneladusvirus</b>    | 21   | 3    | 6   | 8  | 3   | 58  | 8   | 17 |
| <b>Chiangmaivirus</b>   | 20   | 15   | 12  | 7  | 2   | 35  | 11  | 6  |
| <b>Siminovitchvirus</b> | 17   | 0    | 1   | 0  | 0   | 1   | 0   | 4  |
| <b>Phikzvirus</b>       | 13   | 22   | 3   | 4  | 9   | 9   | 19  | 13 |
| <b>Tegunavirus</b>      | 12   | 4    | 1   | 4  | 2   | 41  | 8   | 18 |
| <b>Alcyoneusvirus</b>   | 9    | 4    | 2   | 1  | 3   | 4   | 5   | 8  |
| <b>Agricanvirus</b>     | 9    | 11   | 11  | 2  | 6   | 17  | 9   | 0  |
| <b>Fletchervirus</b>    | 6    | 2    | 0   | 0  | 2   | 1   | 1   | 11 |
| <b>Firehammervirus</b>  | 3    | 2    | 1   | 1  | 0   | 5   | 1   | 13 |
| <b>Sepunavirus</b>      | 8    | 3    | 0   | 4  | 11  | 3   | 4   | 6  |
| <b>Nazgulvirus</b>      | 8    | 4    | 2   | 8  | 1   | 0   | 0   | 1  |
| <b>Pakpunavirus</b>     | 6    | 0    | 4   | 4  | 4   | 2   | 3   | 2  |
| <b>Tulanevirus</b>      | 5    | 4    | 1   | 4  | 1   | 67  | 6   | 22 |
| <b>Shalavirus</b>       | 5    | 2    | 1   | 0  | 1   | 3   | 0   | 0  |
| <b>Jilinvirus</b>       | 4    | 2    | 6   | 6  | 4   | 3   | 4   | 9  |
| <b>Otagovirus</b>       | 4    | 9    | 6   | 3  | 4   | 9   | 7   | 4  |
| <b>Seoulvirus</b>       | 4    | 2    | 6   | 1  | 0   | 3   | 0   | 3  |
| <b>Biquartavirus</b>    | 3    | 0    | 7   | 2  | 2   | 10  | 1   | 2  |
| <b>Vidavervirus</b>     | 3    | 7    | 3   | 6  | 8   | 3   | 5   | 1  |
| <b>Hapunavirus</b>      | 3    | 7    | 0   | 0  | 3   | 1   | 4   | 8  |
| <b>Elvirus</b>          | 3    | 0    | 0   | 0  | 0   | 0   | 0   | 0  |
| <b>Yokohamavirus</b>    | 3    | 2    | 0   | 0  | 0   | 1   | 0   | 2  |
| <b>Nankokuvirus</b>     | 3    | 0    | 1   | 0  | 1   | 0   | 0   | 1  |
| <b>Emdodecavirus</b>    | 2    | 4    | 0   | 4  | 5   | 2   | 1   | 1  |
| <b>Radnorvirus</b>      | 2    | 2    | 3   | 0  | 1   | 2   | 2   | 4  |
| <b>Erskinevirus</b>     | 2    | 8    | 0   | 3  | 1   | 1   | 0   | 9  |
| <b>Vhmlvirus</b>        | 2    | 0    | 1   | 7  | 6   | 0   | 13  | 7  |
| <b>Bcepnavirus</b>      | 2    | 1    | 1   | 0  | 2   | 3   | 2   | 2  |
| <b>Bequatrovirus</b>    | 1    | 6    | 0   | 1  | 3   | 3   | 1   | 2  |
| <b>Viunavirus</b>       | 1    | 1    | 0   | 0  | 4   | 1   | 3   | 2  |
| <b>Machinavirus</b>     | 1    | 16   | 4   | 0  | 0   | 4   | 1   | 72 |
| <b>Svunavirus</b>       | 1    | 2    | 0   | 5  | 3   | 2   | 0   | 0  |
| <b>Skunavirus</b>       | 1714 | 1140 | 87  | 72 | 95  | 366 | 243 | 77 |
| <b>Cronusvirus</b>      | 1150 | 23   | 11  | 18 | 9   | 14  | 24  | 5  |
| <b>Barnyardvirus</b>    | 649  | 19   | 11  | 10 | 70  | 23  | 158 | 5  |
| <b>Liefievirus</b>      | 378  | 517  | 52  | 94 | 865 | 165 | 268 | 73 |
| <b>Coopervirus</b>      | 120  | 162  | 243 | 30 | 35  | 73  | 150 | 29 |
| <b>Acadianvirus</b>     | 20   | 29   | 11  | 6  | 17  | 11  | 26  | 3  |
| <b>Pipefishvirus</b>    | 16   | 25   | 12  | 6  | 7   | 16  | 12  | 9  |

|                         |     |     |     |     |       |     |     |     |
|-------------------------|-----|-----|-----|-----|-------|-----|-----|-----|
| <b>Rosebushvirus</b>    | 16  | 14  | 6   | 9   | 6     | 34  | 24  | 7   |
| <b>Pegunavirus</b>      | 13  | 22  | 5   | 2   | 10    | 7   | 12  | 9   |
| <b>Kagunavirus</b>      | 139 | 7   | 7   | 4   | 68    | 5   | 3   | 32  |
| <b>Jerseyvirus</b>      | 47  | 7   | 3   | 9   | 65    | 97  | 10  | 21  |
| <b>Cornellvirus</b>     | 11  | 0   | 0   | 0   | 2     | 1   | 2   | 2   |
| <b>Ceduovirus</b>       | 197 | 159 | 127 | 116 | 51    | 179 | 234 | 28  |
| <b>Fromanvirus</b>      | 178 | 109 | 61  | 79  | 106   | 98  | 114 | 78  |
| <b>Pamexvirus</b>       | 177 | 512 | 42  | 53  | 82    | 26  | 14  | 20  |
| <b>Septimatrevirus</b>  | 142 | 17  | 8   | 656 | 10    | 21  | 50  | 211 |
| <b>Efquatrovirus</b>    | 141 | 31  | 21  | 23  | 741   | 27  | 39  | 2   |
| <b>Trigintaduovirus</b> | 138 | 25  | 2   | 3   | 158   | 53  | 24  | 3   |
| <b>Phicbkvirus</b>      | 95  | 53  | 27  | 29  | 19    | 25  | 28  | 12  |
| <b>Timquatrovirus</b>   | 93  | 46  | 50  | 47  | 41    | 54  | 64  | 38  |
| <b>Cheoctovirus</b>     | 77  | 50  | 88  | 60  | 35    | 29  | 40  | 19  |
| <b>Bronvirus</b>        | 69  | 22  | 24  | 8   | 16    | 46  | 21  | 11  |
| <b>Moineauvirus</b>     | 67  | 54  | 4   | 14  | 104   | 119 | 28  | 9   |
| <b>Roufvirus</b>        | 52  | 113 | 75  | 87  | 14488 | 190 | 134 | 72  |
| <b>Cequinquevirus</b>   | 40  | 11  | 2   | 8   | 2     | 48  | 16  | 3   |
| <b>Patiencevirus</b>    | 39  | 7   | 2   | 47  | 8     | 13  | 33  | 3   |
| <b>Wizardvirus</b>      | 37  | 5   | 1   | 12  | 10    | 7   | 1   | 0   |
| <b>Brussowvirus</b>     | 35  | 37  | 21  | 4   | 173   | 29  | 47  | 10  |
| <b>Rtpvirus</b>         | 10  | 14  | 6   | 22  | 54    | 27  | 29  | 6   |
| <b>Rogunavirus</b>      | 9   | 5   | 1   | 2   | 22    | 8   | 5   | 2   |
| <b>Tlsvirus</b>         | 6   | 1   | 0   | 3   | 8     | 9   | 24  | 6   |
| <b>Webervirus</b>       | 5   | 6   | 2   | 2   | 10    | 12  | 9   | 7   |
| <b>Buttersvirus</b>     | 17  | 4   | 2   | 6   | 7     | 9   | 5   | 1   |
| <b>Charlievirus</b>     | 6   | 7   | 0   | 0   | 3     | 2   | 4   | 1   |
| <b>Redivirus</b>        | 4   | 6   | 0   | 1   | 7     | 4   | 1   | 0   |
| <b>Mapvirus</b>         | 30  | 18  | 4   | 2   | 12    | 16  | 13  | 5   |
| <b>Smoothievirus</b>    | 27  | 2   | 2   | 2   | 2     | 5   | 4   | 1   |
| <b>Chivirus</b>         | 25  | 10  | 10  | 33  | 3     | 12  | 10  | 12  |
| <b>Phayoncevirus</b>    | 19  | 5   | 1   | 2   | 7     | 1   | 6   | 4   |
| <b>Fishburnevirus</b>   | 3   | 6   | 3   | 2   | 4     | 6   | 3   | 1   |
| <b>Nymphadoravirus</b>  | 16  | 8   | 1   | 3   | 4     | 4   | 17  | 0   |
| <b>Baxtervirus</b>      | 6   | 5   | 1   | 0   | 4     | 2   | 2   | 1   |
| <b>Pepyhexavirus</b>    | 21  | 94  | 4   | 42  | 10    | 19  | 61  | 12  |
| <b>Tinduovirus</b>      | 21  | 3   | 4   | 11  | 54    | 38  | 11  | 2   |
| <b>Abidjanvirus</b>     | 18  | 4   | 14  | 3   | 4     | 11  | 4   | 2   |
| <b>Phietavirus</b>      | 18  | 2   | 1   | 13  | 2     | 2   | 5   | 0   |
| <b>Nipunavirus</b>      | 16  | 7   | 38  | 3   | 7     | 5   | 3   | 10  |

|                        |    |    |    |    |    |    |     |     |
|------------------------|----|----|----|----|----|----|-----|-----|
| <b>Chenonavirus</b>    | 15 | 6  | 1  | 7  | 14 | 6  | 5   | 0   |
| <b>Nonagvirus</b>      | 15 | 4  | 0  | 30 | 2  | 5  | 0   | 5   |
| <b>Likavirus</b>       | 12 | 6  | 17 | 9  | 4  | 3  | 19  | 5   |
| <b>Camvirus</b>        | 2  | 6  | 10 | 4  | 1  | 2  | 9   | 0   |
| <b>Arequatrovirus</b>  | 1  | 1  | 0  | 1  | 1  | 1  | 1   | 1   |
| <b>Paohexavirus</b>    | 14 | 4  | 5  | 6  | 5  | 3  | 5   | 2   |
| <b>Corndogvirus</b>    | 14 | 7  | 2  | 6  | 29 | 1  | 17  | 14  |
| <b>Seuratvirus</b>     | 13 | 5  | 7  | 2  | 2  | 24 | 9   | 3   |
| <b>Emalynvirus</b>     | 13 | 0  | 1  | 7  | 6  | 4  | 4   | 0   |
| <b>Yuavirus</b>        | 12 | 6  | 3  | 10 | 40 | 1  | 8   | 3   |
| <b>Biseptimavirus</b>  | 12 | 1  | 0  | 0  | 0  | 2  | 2   | 0   |
| <b>Minunavirus</b>     | 12 | 20 | 4  | 39 | 9  | 4  | 19  | 1   |
| <b>Betterkatzvirus</b> | 11 | 25 | 5  | 7  | 5  | 4  | 2   | 0   |
| <b>Tequintavirus</b>   | 11 | 11 | 1  | 35 | 6  | 23 | 406 | 108 |
| <b>Brujitavirus</b>    | 11 | 7  | 1  | 6  | 14 | 2  | 8   | 1   |
| <b>Phifelvirus</b>     | 10 | 0  | 1  | 16 | 10 | 11 | 4   | 0   |
| <b>Vividuovirus</b>    | 10 | 6  | 1  | 2  | 1  | 4  | 3   | 2   |
| <b>Woodruffvirus</b>   | 8  | 9  | 1  | 9  | 4  | 2  | 6   | 4   |
| <b>Kostyavirus</b>     | 8  | 3  | 3  | 2  | 4  | 3  | 3   | 3   |
| <b>Casadabanvirus</b>  | 7  | 6  | 3  | 2  | 0  | 1  | 3   | 0   |
| <b>Gordtnkvirus</b>    | 7  | 6  | 2  | 2  | 1  | 7  | 0   | 0   |
| <b>Sextaecvirus</b>    | 7  | 0  | 0  | 3  | 4  | 4  | 11  | 4   |
| <b>Omegavirus</b>      | 6  | 4  | 10 | 8  | 7  | 4  | 9   | 2   |
| <b>Lambdavirus</b>     | 6  | 0  | 0  | 0  | 0  | 0  | 0   | 0   |
| <b>Hedwigvirus</b>     | 6  | 3  | 0  | 7  | 0  | 2  | 2   | 0   |
| <b>Unahavirus</b>      | 6  | 1  | 2  | 5  | 0  | 0  | 32  | 17  |
| <b>Ahduovirus</b>      | 6  | 5  | 6  | 1  | 1  | 3  | 2   | 0   |
| <b>Xipdecavirus</b>    | 5  | 2  | 1  | 0  | 1  | 13 | 1   | 0   |
| <b>Dhillonvirus</b>    | 5  | 21 | 2  | 1  | 13 | 53 | 3   | 10  |
| <b>Gilesvirus</b>      | 5  | 3  | 0  | 1  | 81 | 6  | 1   | 0   |
| <b>Bantamvirus</b>     | 5  | 6  | 5  | 26 | 8  | 2  | 1   | 1   |
| <b>Hawkeyevirus</b>    | 5  | 1  | 0  | 1  | 0  | 1  | 0   | 1   |
| <b>Soupsvirus</b>      | 4  | 6  | 2  | 0  | 1  | 13 | 0   | 3   |
| <b>Titanvirus</b>      | 4  | 6  | 3  | 4  | 0  | 0  | 110 | 16  |
| <b>Papyrusvirus</b>    | 4  | 5  | 0  | 0  | 10 | 0  | 2   | 1   |
| <b>Woesvirus</b>       | 4  | 1  | 2  | 5  | 2  | 3  | 3   | 1   |
| <b>Nyceiraevirus</b>   | 4  | 0  | 1  | 3  | 3  | 0  | 4   | 0   |
| <b>Andromedavirus</b>  | 4  | 0  | 1  | 0  | 0  | 2  | 1   | 2   |
| <b>Attisvirus</b>      | 4  | 0  | 2  | 0  | 1  | 4  | 0   | 0   |
| <b>Hendrixvirus</b>    | 4  | 8  | 4  | 2  | 5  | 7  | 12  | 14  |

|                         |     |     |    |     |      |     |     |    |
|-------------------------|-----|-----|----|-----|------|-----|-----|----|
| <b>Wildcatvirus</b>     | 3   | 0   | 0  | 0   | 5    | 2   | 2   | 0  |
| <b>Bongovirus</b>       | 3   | 1   | 1  | 0   | 2    | 2   | 2   | 1  |
| <b>Vendettavirus</b>    | 3   | 0   | 1  | 0   | 0    | 1   | 0   | 1  |
| <b>Limdunavirus</b>     | 3   | 4   | 5  | 0   | 1    | 4   | 3   | 1  |
| <b>Pulverervirus</b>    | 3   | 0   | 2  | 1   | 1    | 3   | 0   | 0  |
| <b>Bernalvirus</b>      | 3   | 0   | 1  | 1   | 3    | 0   | 1   | 0  |
| <b>Mudcatvirus</b>      | 3   | 2   | 0  | 9   | 1    | 13  | 1   | 3  |
| <b>Cinunavirus</b>      | 3   | 1   | 0  | 1   | 0    | 3   | 1   | 0  |
| <b>Eyrevirus</b>        | 3   | 0   | 0  | 4   | 5    | 0   | 1   | 1  |
| <b>Stanholtvirus</b>    | 3   | 1   | 0  | 1   | 0    | 0   | 1   | 1  |
| <b>Beetrevirus</b>      | 2   | 2   | 0  | 2   | 0    | 1   | 1   | 1  |
| <b>Bendigovirus</b>     | 2   | 0   | 0  | 1   | 0    | 0   | 1   | 1  |
| <b>Bowservirus</b>      | 2   | 0   | 0  | 2   | 4    | 0   | 0   | 0  |
| <b>Chunghsingvirus</b>  | 2   | 0   | 0  | 1   | 0    | 0   | 0   | 0  |
| <b>Galunavirus</b>      | 2   | 1   | 0  | 6   | 5    | 1   | 0   | 1  |
| <b>Gesputvirus</b>      | 2   | 0   | 0  | 2   | 1    | 0   | 1   | 3  |
| <b>Klementvirus</b>     | 2   | 13  | 0  | 1   | 0    | 1   | 0   | 0  |
| <b>Yvonnevirus</b>      | 2   | 0   | 1  | 2   | 1    | 0   | 1   | 1  |
| <b>Xiamenvirus</b>      | 2   | 1   | 1  | 1   | 0    | 1   | 0   | 0  |
| <b>Slashvirus</b>       | 2   | 1   | 1  | 0   | 0    | 2   | 1   | 0  |
| <b>Demosthenesvirus</b> | 2   | 3   | 2  | 51  | 2    | 5   | 2   | 1  |
| <b>Decurrovirus</b>     | 1   | 0   | 2  | 0   | 0    | 1   | 0   | 1  |
| <b>Helsingorvirus</b>   | 1   | 0   | 0  | 1   | 0    | 0   | 0   | 9  |
| <b>Homburgvirus</b>     | 1   | 2   | 4  | 0   | 2    | 1   | 0   | 1  |
| <b>Myunavirus</b>       | 1   | 1   | 1  | 0   | 0    | 0   | 0   | 0  |
| <b>Lomovskayavirus</b>  | 1   | 5   | 1  | 5   | 9    | 3   | 1   | 0  |
| <b>Saphexavirus</b>     | 1   | 0   | 1  | 0   | 0    | 0   | 1   | 9  |
| <b>Marvinvirus</b>      | 1   | 3   | 2  | 1   | 2    | 2   | 5   | 0  |
| <b>Samistivirus</b>     | 1   | 0   | 0  | 1   | 2    | 1   | 0   | 0  |
| <b>Gaiavirus</b>        | 1   | 0   | 1  | 0   | 12   | 3   | 6   | 2  |
| <b>Sasvirus</b>         | 1   | 0   | 1  | 0   | 0    | 0   | 0   | 1  |
| <b>Pbi1virus</b>        | 1   | 0   | 0  | 1   | 3    | 1   | 2   | 0  |
| <b>Steinhofvirus</b>    | 1   | 0   | 0  | 0   | 0    | 2   | 0   | 2  |
| <b>Kelleziavirus</b>    | 1   | 1   | 0  | 0   | 3    | 0   | 1   | 1  |
| <b>Gamtrevirus</b>      | 1   | 1   | 0  | 0   | 0    | 0   | 0   | 0  |
| <b>Jwalphavirus</b>     | 387 | 12  | 23 | 91  | 72   | 41  | 35  | 58 |
| <b>Teseptimavirus</b>   | 181 | 147 | 70 | 83  | 78   | 154 | 275 | 53 |
| <b>Friunavirus</b>      | 51  | 72  | 35 | 44  | 8400 | 59  | 71  | 21 |
| <b>Phikmvirus</b>       | 18  | 9   | 5  | 468 | 12   | 15  | 28  | 7  |
| <b>Pradovirus</b>       | 13  | 18  | 2  | 65  | 10   | 6   | 10  | 3  |

|                         |     |     |     |     |     |     |     |     |
|-------------------------|-----|-----|-----|-----|-----|-----|-----|-----|
| <b>Zindervirus</b>      | 9   | 5   | 11  | 10  | 513 | 24  | 31  | 27  |
| <b>Przondovirus</b>     | 2   | 0   | 0   | 1   | 0   | 2   | 0   | 5   |
| <b>Phimunavirus</b>     | 2   | 10  | 3   | 0   | 2   | 1   | 2   | 81  |
| <b>Johnsonvirus</b>     | 80  | 2   | 6   | 38  | 11  | 5   | 8   | 31  |
| <b>Gamaleyavirus</b>    | 40  | 6   | 4   | 12  | 71  | 6   | 11  | 21  |
| <b>Rosenblumvirus</b>   | 4   | 1   | 0   | 1   | 7   | 1   | 3   | 2   |
| <b>Salasvirus</b>       | 1   | 0   | 0   | 0   | 0   | 4   | 2   | 1   |
| <b>Lessievirus</b>      | 23  | 19  | 23  | 10  | 21  | 10  | 20  | 17  |
| <b>Lederbergvirus</b>   | 22  | 2   | 0   | 0   | 2   | 4   | 2   | 1   |
| <b>Litunavirus</b>      | 21  | 7   | 2   | 16  | 0   | 7   | 16  | 6   |
| <b>Luzseptimavirus</b>  | 11  | 1   | 3   | 6   | 2   | 5   | 12  | 4   |
| <b>Kochitakasuvirus</b> | 8   | 1   | 11  | 8   | 2   | 3   | 8   | 1   |
| <b>Pagevirus</b>        | 4   | 0   | 0   | 0   | 2   | 4   | 0   | 1   |
| <b>Ithacavirus</b>      | 4   | 2   | 0   | 0   | 7   | 6   | 8   | 20  |
| <b>Hollowayvirus</b>    | 4   | 0   | 0   | 3   | 6   | 6   | 6   | 4   |
| <b>Bruynoghevirus</b>   | 4   | 0   | 0   | 0   | 0   | 1   | 3   | 1   |
| <b>Rauchvirus</b>       | 3   | 1   | 1   | 0   | 1   | 2   | 0   | 0   |
| <b>Fipvunavirus</b>     | 3   | 5   | 1   | 2   | 3   | 2   | 28  | 48  |
| <b>Kuravirus</b>        | 2   | 2   | 2   | 0   | 1   | 1   | 1   | 4   |
| <b>Uetakevirus</b>      | 2   | 1   | 0   | 1   | 1   | 0   | 4   | 0   |
| <b>Lightbulbvirus</b>   | 2   | 1   | 1   | 1   | 2   | 2   | 1   | 4   |
| <b>Schmidvirus</b>      | 1   | 0   | 0   | 0   | 1   | 0   | 0   | 0   |
| <b>Baltimorevirus</b>   | 1   | 0   | 0   | 0   | 0   | 0   | 1   | 0   |
| <b>Bifseptvirus</b>     | 1   | 1   | 0   | 3   | 2   | 1   | 0   | 1   |
| <b>Enhodamvirus</b>     | 1   | 0   | 5   | 1   | 0   | 2   | 1   | 0   |
| <b>Wphvirus</b>         | 12  | 2   | 9   | 1   | 2   | 14  | 8   | 6   |
| <b>Caeruleovirus</b>    | 6   | 1   | 3   | 4   | 2   | 1   | 2   | 8   |
| <b>Tsarbombavirus</b>   | 5   | 1   | 1   | 0   | 0   | 6   | 2   | 0   |
| <b>Bastillevirus</b>    | 3   | 2   | 0   | 1   | 0   | 4   | 1   | 5   |
| <b>Agatevirus</b>       | 1   | 0   | 0   | 0   | 0   | 1   | 0   | 2   |
| <b>Silviavirus</b>      | 5   | 2   | 1   | 0   | 1   | 3   | 1   | 8   |
| <b>Kayvirus</b>         | 2   | 0   | 0   | 0   | 14  | 4   | 1   | 14  |
| <b>Twortvirus</b>       | 1   | 3   | 2   | 1   | 2   | 5   | 4   | 5   |
| <b>Okubovirus</b>       | 1   | 2   | 0   | 1   | 1   | 0   | 2   | 0   |
| <b>Kochikohdavirus</b>  | 2   | 0   | 0   | 2   | 1   | 0   | 2   | 1   |
| <b>Agtrevirus</b>       | 1   | 0   | 0   | 0   | 0   | 0   | 2   | 1   |
| <b>Limestonevirus</b>   | 1   | 0   | 0   | 0   | 0   | 0   | 4   | 2   |
| <b>Kuttervirus</b>      | 2   | 0   | 7   | 3   | 1   | 5   | 26  | 4   |
| <b>Pandoravirus</b>     | 310 | 269 | 214 | 240 | 147 | 266 | 233 | 119 |
| <b>Pithovirus</b>       | 3   | 3   | 3   | 0   | 3   | 3   | 2   | 8   |



|                            |     |     |    |    |    |     |     |    |
|----------------------------|-----|-----|----|----|----|-----|-----|----|
| <b>Betabaculovirus</b>     | 204 | 129 | 25 | 70 | 60 | 111 | 184 | 48 |
| <b>Alphabaculovirus</b>    | 91  | 65  | 40 | 50 | 33 | 76  | 100 | 83 |
| <b>Gammabaculovirus</b>    | 3   | 0   | 0  | 0  | 1  | 0   | 0   | 0  |
| <b>Varicellovirus</b>      | 65  | 41  | 50 | 35 | 37 | 46  | 114 | 21 |
| <b>Simplexvirus</b>        | 51  | 26  | 13 | 50 | 26 | 22  | 22  | 8  |
| <b>Mardivirus</b>          | 7   | 3   | 3  | 3  | 3  | 2   | 3   | 27 |
| <b>Iltovirus</b>           | 4   | 1   | 11 | 3  | 1  | 2   | 3   | 1  |
| <b>Scutavirus</b>          | 2   | 1   | 0  | 0  | 0  | 0   | 1   | 0  |
| <b>Cytomegalovirus</b>     | 31  | 20  | 24 | 15 | 6  | 5   | 19  | 16 |
| <b>Muromegalovirus</b>     | 16  | 31  | 17 | 8  | 4  | 7   | 17  | 1  |
| <b>Roseolovirus</b>        | 6   | 5   | 5  | 0  | 2  | 2   | 6   | 6  |
| <b>Proboscivirus</b>       | 5   | 3   | 1  | 5  | 2  | 3   | 2   | 4  |
| <b>Rhadinovirus</b>        | 7   | 5   | 0  | 10 | 4  | 3   | 6   | 4  |
| <b>Lymphocryptovirus</b>   | 4   | 2   | 2  | 0  | 7  | 2   | 2   | 1  |
| <b>Percavirus</b>          | 3   | 1   | 2  | 1  | 1  | 0   | 1   | 3  |
| <b>Cyprinivirus</b>        | 19  | 16  | 13 | 18 | 9  | 7   | 10  | 2  |
| <b>Batrachovirus</b>       | 1   | 3   | 14 | 0  | 1  | 2   | 3   | 0  |
| <b>Aurivirus</b>           | 3   | 0   | 1  | 1  | 0  | 1   | 2   | 0  |
| <b>Betapolyomavirus</b>    | 169 | 7   | 2  | 14 | 6  | 6   | 30  | 4  |
| <b>Alphapolyomavirus</b>   | 6   | 1   | 1  | 0  | 1  | 0   | 0   | 2  |
| <b>Nucleorhabdovirus</b>   | 5   | 3   | 0  | 0  | 0  | 0   | 0   | 0  |
| <b>Almendravirus</b>       | 2   | 0   | 0  | 0  | 0  | 1   | 0   | 0  |
| <b>Cytorhabdovirus</b>     | 1   | 0   | 0  | 0  | 0  | 0   | 0   | 0  |
| <b>Rubulavirus</b>         | 5   | 2   | 2  | 0  | 1  | 1   | 4   | 0  |
| <b>Morbillivirus</b>       | 1   | 0   | 0  | 0  | 0  | 0   | 3   | 2  |
| <b>Orthobornavirus</b>     | 3   | 0   | 0  | 0  | 0  | 0   | 0   | 0  |
| <b>Metapneumovirus</b>     | 1   | 0   | 0  | 0  | 1  | 0   | 0   | 0  |
| <b>Ophiovirus</b>          | 1   | 0   | 0  | 0  | 0  | 0   | 0   | 0  |
| <b>Tospovirus</b>          | 5   | 11  | 0  | 0  | 0  | 0   | 0   | 0  |
| <b>Orthobunyavirus</b>     | 2   | 3   | 1  | 2  | 1  | 2   | 7   | 0  |
| <b>Mammarenavirus</b>      | 2   | 1   | 0  | 1  | 0  | 3   | 1   | 0  |
| <b>Orthonairovirus</b>     | 2   | 0   | 0  | 1  | 1  | 0   | 1   | 0  |
| <b>Orthotospovirus</b>     | 2   | 0   | 1  | 0  | 0  | 0   | 2   | 0  |
| <b>Emaravirus</b>          | 1   | 0   | 0  | 1  | 1  | 0   | 0   | 5  |
| <b>Tenuivirus</b>          | 1   | 1   | 0  | 0  | 0  | 0   | 0   | 0  |
| <b>Alphainfluenzavirus</b> | 1   | 1   | 0  | 0  | 1  | 0   | 0   | 0  |
| <b>Epsilonarterivirus</b>  | 7   | 0   | 0  | 1  | 0  | 0   | 1   | 0  |
| <b>Betaarterivirus</b>     | 1   | 1   | 0  | 0  | 0  | 1   | 0   | 0  |
| <b>Gammaarterivirus</b>    | 1   | 0   | 0  | 0  | 0  | 0   | 0   | 0  |
| <b>Betacoronavirus</b>     | 5   | 4   | 3  | 3  | 2  | 7   | 4   | 6  |

|                           |     |    |    |    |    |     |    |     |
|---------------------------|-----|----|----|----|----|-----|----|-----|
| <b>Alphacoronavirus</b>   | 3   | 3  | 2  | 6  | 0  | 10  | 0  | 1   |
| <b>Deltacoronavirus</b>   | 1   | 1  | 0  | 0  | 0  | 1   | 0  | 0   |
| <b>Bostovirus</b>         | 2   | 0  | 0  | 0  | 1  | 0   | 1  | 0   |
| <b>Tobamovirus</b>        | 6   | 2  | 0  | 3  | 0  | 2   | 4  | 3   |
| <b>Furovirus</b>          | 6   | 0  | 0  | 1  | 0  | 0   | 0  | 2   |
| <b>Alphaendornavirus</b>  | 9   | 5  | 4  | 9  | 0  | 8   | 10 | 3   |
| <b>Nepovirus</b>          | 2   | 0  | 0  | 0  | 0  | 0   | 0  | 9   |
| <b>Fabavirus</b>          | 1   | 0  | 0  | 0  | 0  | 0   | 0  | 0   |
| <b>Waikavirus</b>         | 1   | 0  | 0  | 0  | 0  | 0   | 0  | 0   |
| <b>Iflavirus</b>          | 1   | 0  | 0  | 1  | 0  | 0   | 0  | 0   |
| <b>Kobuvirus</b>          | 1   | 0  | 0  | 0  | 0  | 0   | 0  | 0   |
| <b>Cosavirus</b>          | 1   | 1  | 5  | 0  | 0  | 1   | 3  | 0   |
| <b>Robigovirus</b>        | 6   | 0  | 0  | 0  | 0  | 3   | 0  | 2   |
| <b>Carlavirus</b>         | 3   | 2  | 0  | 1  | 0  | 0   | 1  | 0   |
| <b>Tymovirus</b>          | 1   | 1  | 0  | 0  | 0  | 4   | 0  | 1   |
| <b>Aquareovirus</b>       | 5   | 2  | 0  | 11 | 0  | 2   | 0  | 0   |
| <b>Fijivirus</b>          | 1   | 0  | 0  | 0  | 0  | 0   | 0  | 0   |
| <b>Orbivirus</b>          | 2   | 4  | 0  | 1  | 2  | 0   | 3  | 2   |
| <b>Negevirus</b>          | 1   | 0  | 0  | 0  | 0  | 0   | 0  | 0   |
| <b>Mamastrovirus</b>      | 1   | 1  | 0  | 0  | 0  | 2   | 1  | 1   |
| <b>Polerovirus</b>        | 3   | 6  | 1  | 0  | 0  | 1   | 0  | 0   |
| <b>Flavivirus</b>         | 2   | 0  | 3  | 9  | 0  | 4   | 3  | 0   |
| <b>Potyvirus</b>          | 2   | 2  | 1  | 7  | 1  | 3   | 9  | 1   |
| <b>Illavirus</b>          | 2   | 0  | 1  | 0  | 1  | 1   | 0  | 2   |
| <b>Velarivirus</b>        | 1   | 0  | 0  | 0  | 0  | 0   | 1  | 0   |
| <b>Narnavirus</b>         | 1   | 0  | 0  | 0  | 5  | 0   | 0  | 0   |
| <b>Benyvirus</b>          | 1   | 0  | 0  | 0  | 1  | 1   | 30 | 0   |
| <b>Picobirnavirus</b>     | 1   | 1  | 0  | 0  | 0  | 1   | 0  | 0   |
| <b>Polemovirus</b>        | 1   | 0  | 0  | 0  | 0  | 0   | 0  | 0   |
| <b>Totivirus</b>          | 1   | 0  | 0  | 0  | 0  | 0   | 0  | 0   |
| <b>Mimivirus</b>          | 141 | 79 | 63 | 75 | 32 | 103 | 88 | 135 |
| <b>Cafeteriavirus</b>     | 8   | 6  | 4  | 4  | 1  | 8   | 5  | 16  |
| <b>Parapoxvirus</b>       | 24  | 25 | 15 | 16 | 11 | 21  | 13 | 14  |
| <b>Molluscipoxvirus</b>   | 19  | 3  | 1  | 5  | 2  | 2   | 4  | 2   |
| <b>Orthopoxvirus</b>      | 17  | 6  | 0  | 1  | 3  | 7   | 6  | 10  |
| <b>Avipoxvirus</b>        | 7   | 6  | 8  | 5  | 5  | 10  | 6  | 10  |
| <b>Suipoxvirus</b>        | 7   | 8  | 0  | 0  | 1  | 3   | 3  | 0   |
| <b>Cervidpoxvirus</b>     | 3   | 0  | 0  | 1  | 0  | 0   | 0  | 1   |
| <b>Centapoxvirus</b>      | 3   | 2  | 1  | 1  | 2  | 2   | 0  | 9   |
| <b>Crocodylidpoxvirus</b> | 2   | 3  | 1  | 2  | 2  | 5   | 2  | 0   |

|                              |    |    |    |    |   |    |    |    |
|------------------------------|----|----|----|----|---|----|----|----|
| <b>Capripoxvirus</b>         | 1  | 1  | 0  | 1  | 0 | 2  | 0  | 14 |
| <b>Leporipoxvirus</b>        | 1  | 3  | 1  | 1  | 1 | 4  | 2  | 0  |
| <b>Yatapoxvirus</b>          | 1  | 0  | 0  | 2  | 0 | 0  | 1  | 1  |
| <b>Betaentomopoxvirus</b>    | 17 | 16 | 4  | 5  | 2 | 8  | 9  | 17 |
| <b>Alphaentomopoxvirus</b>   | 7  | 5  | 2  | 1  | 1 | 5  | 2  | 7  |
| <b>Prasinovirus</b>          | 33 | 11 | 8  | 29 | 8 | 13 | 11 | 5  |
| <b>Chlorovirus</b>           | 18 | 25 | 3  | 26 | 8 | 18 | 22 | 17 |
| <b>Coccolithovirus</b>       | 15 | 11 | 1  | 6  | 1 | 11 | 6  | 5  |
| <b>Raphidovirus</b>          | 5  | 1  | 1  | 2  | 1 | 1  | 2  | 3  |
| <b>Prymnesiovirus</b>        | 4  | 6  | 0  | 1  | 4 | 4  | 3  | 13 |
| <b>Phaeovirus</b>            | 3  | 1  | 0  | 2  | 1 | 3  | 0  | 2  |
| <b>Alphapapillomavirus</b>   | 20 | 0  | 0  | 3  | 0 | 8  | 0  | 0  |
| <b>Gammapapillomavirus</b>   | 11 | 1  | 2  | 3  | 0 | 7  | 3  | 0  |
| <b>Betapapillomavirus</b>    | 2  | 0  | 0  | 3  | 0 | 1  | 0  | 0  |
| <b>Rhopapillomavirus</b>     | 1  | 0  | 0  | 0  | 0 | 0  | 0  | 0  |
| <b>Iotapapillomavirus</b>    | 1  | 0  | 0  | 0  | 0 | 0  | 0  | 2  |
| <b>Mastadenovirus</b>        | 25 | 8  | 8  | 16 | 6 | 21 | 15 | 25 |
| <b>Aviadenovirus</b>         | 5  | 6  | 4  | 5  | 4 | 3  | 8  | 0  |
| <b>Atadenovirus</b>          | 3  | 1  | 0  | 1  | 5 | 3  | 0  | 0  |
| <b>Iridovirus</b>            | 9  | 3  | 0  | 4  | 7 | 9  | 4  | 35 |
| <b>Chloriridovirus</b>       | 5  | 1  | 2  | 3  | 2 | 3  | 7  | 16 |
| <b>Ranavirus</b>             | 7  | 2  | 2  | 1  | 1 | 5  | 4  | 2  |
| <b>Lymphocystivirus</b>      | 3  | 3  | 2  | 3  | 2 | 3  | 39 | 14 |
| <b>Megalocytivirus</b>       | 1  | 1  | 0  | 0  | 0 | 0  | 1  | 4  |
| <b>Marseillevirus</b>        | 20 | 14 | 10 | 14 | 8 | 9  | 14 | 6  |
| <b>Inovirus</b>              | 6  | 0  | 0  | 4  | 0 | 2  | 0  | 0  |
| <b>Gemycircularvirus</b>     | 7  | 2  | 1  | 0  | 2 | 24 | 2  | 0  |
| <b>Gemykibivirus</b>         | 5  | 6  | 18 | 12 | 3 | 1  | 1  | 0  |
| <b>Muscavirus</b>            | 8  | 0  | 0  | 1  | 1 | 0  | 0  | 0  |
| <b>Glossinavirus</b>         | 3  | 1  | 0  | 0  | 2 | 1  | 1  | 3  |
| <b>Begomovirus</b>           | 8  | 6  | 2  | 2  | 7 | 17 | 7  | 5  |
| <b>Ichnovirus</b>            | 5  | 0  | 0  | 1  | 0 | 1  | 1  | 13 |
| <b>Bracovirus</b>            | 5  | 2  | 1  | 0  | 0 | 1  | 0  | 3  |
| <b>Alphasphaerolipovirus</b> | 9  | 1  | 1  | 3  | 2 | 1  | 2  | 3  |
| <b>Alphanudivirus</b>        | 2  | 1  | 0  | 0  | 0 | 1  | 2  | 0  |
| <b>Betanudivirus</b>         | 2  | 3  | 0  | 3  | 1 | 0  | 0  | 1  |
| <b>Rudivirus</b>             | 6  | 1  | 0  | 1  | 0 | 1  | 0  | 1  |
| <b>Betalipothrixvirus</b>    | 1  | 0  | 1  | 0  | 0 | 0  | 2  | 1  |
| <b>Badnavirus</b>            | 5  | 6  | 5  | 1  | 0 | 2  | 3  | 8  |
| <b>Caulimovirus</b>          | 2  | 5  | 0  | 0  | 0 | 0  | 0  | 0  |

|                          |   |    |     |   |   |    |   |    |
|--------------------------|---|----|-----|---|---|----|---|----|
| <b>Whispovirus</b>       | 6 | 5  | 5   | 1 | 2 | 3  | 6 | 0  |
| <b>Circovirus</b>        | 2 | 8  | 0   | 1 | 0 | 4  | 2 | 1  |
| <b>Bicaudavirus</b>      | 6 | 8  | 0   | 3 | 1 | 5  | 1 | 1  |
| <b>Bocaparvovirus</b>    | 5 | 5  | 4   | 0 | 1 | 4  | 3 | 1  |
| <b>Ambidensovirus</b>    | 1 | 0  | 0   | 0 | 0 | 0  | 1 | 0  |
| <b>Sputnikvirus</b>      | 2 | 0  | 0   | 1 | 0 | 0  | 1 | 2  |
| <b>Mavirus</b>           | 1 | 0  | 0   | 0 | 0 | 0  | 0 | 0  |
| <b>Alphafusellovirus</b> | 1 | 0  | 0   | 0 | 0 | 0  | 0 | 0  |
| <b>Betafusellovirus</b>  | 1 | 0  | 0   | 0 | 0 | 3  | 1 | 0  |
| <b>Alphatectivirus</b>   | 2 | 1  | 0   | 0 | 0 | 0  | 6 | 6  |
| <b>Nanovirus</b>         | 2 | 0  | 0   | 0 | 0 | 0  | 2 | 0  |
| <b>Alphaturrivirus</b>   | 2 | 0  | 0   | 0 | 0 | 0  | 0 | 0  |
| <b>Alphatorquevirus</b>  | 1 | 0  | 0   | 0 | 0 | 0  | 1 | 0  |
| <b>Ampullavirus</b>      | 1 | 0  | 0   | 0 | 0 | 0  | 0 | 0  |
| <b>Porprismacovirus</b>  | 1 | 0  | 0   | 0 | 0 | 0  | 0 | 0  |
| <b>Betasatellite</b>     | 1 | 1  | 0   | 0 | 0 | 2  | 0 | 0  |
| <b>Drulivirus</b>        | 0 | 2  | 1   | 1 | 1 | 4  | 0 | 25 |
| <b>Enquatrovirus</b>     | 0 | 1  | 0   | 4 | 1 | 2  | 2 | 3  |
| <b>Tunavirus</b>         | 0 | 0  | 0   | 0 | 3 | 2  | 1 | 1  |
| <b>Ravinivirus</b>       | 0 | 2  | 204 | 0 | 1 | 4  | 3 | 7  |
| <b>Bignuzvirus</b>       | 0 | 2  | 1   | 0 | 1 | 2  | 1 | 0  |
| <b>Detrevirus</b>        | 0 | 1  | 1   | 0 | 0 | 1  | 1 | 0  |
| <b>Psavirus</b>          | 0 | 0  | 0   | 0 | 0 | 0  | 0 | 1  |
| <b>Cimpunavirus</b>      | 0 | 0  | 2   | 0 | 0 | 1  | 0 | 3  |
| <b>Coetzeevirus</b>      | 0 | 0  | 0   | 0 | 0 | 0  | 0 | 0  |
| <b>Ghobesvirus</b>       | 0 | 0  | 1   | 0 | 1 | 0  | 0 | 0  |
| <b>Krischvirus</b>       | 0 | 2  | 6   | 1 | 0 | 6  | 1 | 7  |
| <b>Punavirus</b>         | 0 | 1  | 0   | 5 | 0 | 0  | 0 | 4  |
| <b>Lambdaarterivirus</b> | 0 | 1  | 0   | 0 | 0 | 22 | 0 | 1  |
| <b>Phlebovirus</b>       | 0 | 2  | 0   | 0 | 1 | 7  | 1 | 3  |
| <b>Isavirus</b>          | 0 | 0  | 0   | 0 | 0 | 0  | 0 | 5  |
| <b>Sigmavirus</b>        | 0 | 0  | 0   | 0 | 0 | 0  | 0 | 0  |
| <b>Sprivivirus</b>       | 0 | 0  | 0   | 0 | 0 | 0  | 0 | 0  |
| <b>Hapavirus</b>         | 0 | 0  | 0   | 0 | 1 | 0  | 1 | 0  |
| <b>Potexvirus</b>        | 0 | 4  | 0   | 0 | 1 | 0  | 1 | 0  |
| <b>Chrysovirus</b>       | 0 | 0  | 0   | 1 | 0 | 0  | 0 | 0  |
| <b>Macavirus</b>         | 0 | 10 | 2   | 1 | 2 | 6  | 1 | 2  |
| <b>Lentivirus</b>        | 0 | 0  | 0   | 0 | 4 | 0  | 0 | 0  |
| <b>Deltapolyomavirus</b> | 0 | 0  | 0   | 0 | 0 | 0  | 0 | 0  |
| <b>Gequatrovirus</b>     | 0 | 0  | 0   | 0 | 0 | 0  | 1 | 0  |

|                         |   |    |   |    |   |    |    |    |
|-------------------------|---|----|---|----|---|----|----|----|
| <b>Ascovirus</b>        | 0 | 2  | 1 | 0  | 0 | 1  | 2  | 0  |
| <b>Betatorquevirus</b>  | 0 | 34 | 0 | 1  | 0 | 0  | 0  | 0  |
| <b>Unaquatrovirus</b>   | 0 | 27 | 0 | 0  | 1 | 11 | 1  | 2  |
| <b>Rerduovirus</b>      | 0 | 2  | 0 | 0  | 0 | 0  | 1  | 0  |
| <b>Incheonvrus</b>      | 0 | 2  | 0 | 3  | 0 | 1  | 11 | 24 |
| <b>Plotvirus</b>        | 0 | 1  | 0 | 0  | 0 | 0  | 0  | 1  |
| <b>Mardecavirus</b>     | 0 | 2  | 0 | 0  | 0 | 2  | 0  | 0  |
| <b>Oshimavirus</b>      | 0 | 1  | 0 | 11 | 2 | 0  | 1  | 0  |
| <b>Nonanavirus</b>      | 0 | 1  | 1 | 0  | 0 | 1  | 1  | 2  |
| <b>Inhavirus</b>        | 0 | 1  | 0 | 0  | 1 | 1  | 0  | 2  |
| <b>Eiauvirus</b>        | 0 | 1  | 0 | 1  | 0 | 1  | 0  | 0  |
| <b>Tijeunavirus</b>     | 0 | 2  | 0 | 7  | 2 | 1  | 2  | 0  |
| <b>Jimmervirus</b>      | 0 | 1  | 0 | 0  | 0 | 0  | 1  | 0  |
| <b>Nitunavirus</b>      | 0 | 1  | 0 | 0  | 1 | 1  | 11 | 2  |
| <b>Krylovvirus</b>      | 0 | 2  | 2 | 0  | 0 | 3  | 2  | 1  |
| <b>Myxoctovirus</b>     | 0 | 1  | 2 | 3  | 1 | 2  | 0  | 0  |
| <b>Pecentumvirus</b>    | 0 | 2  | 0 | 0  | 0 | 11 | 1  | 5  |
| <b>Deltabaculovirus</b> | 0 | 1  | 1 | 0  | 0 | 4  | 0  | 0  |
| <b>Ictalurivirus</b>    | 0 | 1  | 2 | 2  | 1 | 0  | 0  | 0  |
| <b>Herbevirus</b>       | 0 | 1  | 0 | 0  | 0 | 0  | 1  | 0  |
| <b>Horwuvirus</b>       | 0 | 1  | 0 | 0  | 0 | 0  | 0  | 0  |
| <b>Shaspivirus</b>      | 0 | 1  | 0 | 0  | 0 | 0  | 0  | 0  |
| <b>Novirhabdovirus</b>  | 0 | 1  | 0 | 0  | 0 | 0  | 0  | 0  |
| <b>Avulavirus</b>       | 0 | 1  | 0 | 1  | 0 | 1  | 0  | 0  |
| <b>Ebolavirus</b>       | 0 | 1  | 4 | 0  | 0 | 0  | 1  | 2  |
| <b>Yingvirus</b>        | 0 | 1  | 0 | 0  | 0 | 0  | 0  | 1  |
| <b>Foveavirus</b>       | 0 | 4  | 0 | 0  | 1 | 0  | 1  | 0  |
| <b>Maculavirus</b>      | 0 | 1  | 0 | 0  | 0 | 0  | 0  | 0  |
| <b>Gammacoronavirus</b> | 0 | 1  | 0 | 0  | 0 | 0  | 0  | 0  |
| <b>Paguronivirus</b>    | 0 | 1  | 0 | 0  | 0 | 0  | 0  | 0  |
| <b>Ampivirus</b>        | 0 | 1  | 0 | 0  | 1 | 0  | 0  | 0  |
| <b>Torradovirus</b>     | 0 | 1  | 0 | 0  | 0 | 0  | 0  | 0  |
| <b>Orthoreovirus</b>    | 0 | 2  | 0 | 0  | 0 | 0  | 0  | 0  |
| <b>Victorivirus</b>     | 0 | 2  | 0 | 0  | 0 | 5  | 3  | 0  |
| <b>Pestivirus</b>       | 0 | 1  | 0 | 0  | 0 | 1  | 0  | 0  |
| <b>Pegivirus</b>        | 0 | 1  | 0 | 2  | 1 | 1  | 0  | 0  |
| <b>Betatetravirus</b>   | 0 | 1  | 0 | 0  | 0 | 0  | 0  | 0  |
| <b>Alphavirus</b>       | 0 | 1  | 2 | 0  | 0 | 0  | 0  | 1  |
| <b>Norovirus</b>        | 0 | 1  | 0 | 0  | 0 | 0  | 0  | 0  |
| <b>Gammatorquevirus</b> | 0 | 1  | 0 | 0  | 0 | 0  | 0  | 0  |

|                              |   |    |   |   |    |   |   |   |
|------------------------------|---|----|---|---|----|---|---|---|
| <b>Solendovirus</b>          | 0 | 1  | 0 | 0 | 0  | 0 | 0 | 0 |
| <b>Gammaretrovirus</b>       | 0 | 10 | 1 | 0 | 2  | 1 | 0 | 2 |
| <b>Betaretrovirus</b>        | 0 | 1  | 0 | 0 | 0  | 0 | 0 | 0 |
| <b>Mastrevirus</b>           | 0 | 1  | 0 | 1 | 1  | 0 | 0 | 0 |
| <b>Etapapillomavirus</b>     | 0 | 1  | 0 | 0 | 0  | 0 | 0 | 0 |
| <b>Dyoiotapapillomavirus</b> | 0 | 1  | 0 | 0 | 1  | 0 | 0 | 0 |
| <b>Chipapillomavirus</b>     | 0 | 1  | 0 | 0 | 0  | 0 | 1 | 0 |
| <b>Gammasmaerolipovirus</b>  | 0 | 1  | 0 | 0 | 0  | 0 | 0 | 0 |
| <b>Cecivirus</b>             | 0 | 0  | 1 | 0 | 0  | 0 | 1 | 0 |
| <b>Lubbockvirus</b>          | 0 | 0  | 1 | 0 | 0  | 0 | 0 | 0 |
| <b>Ledantavirus</b>          | 0 | 0  | 1 | 0 | 0  | 0 | 1 | 0 |
| <b>Dichorhavirus</b>         | 0 | 0  | 1 | 0 | 0  | 0 | 0 | 0 |
| <b>Tibrovirus</b>            | 0 | 0  | 1 | 0 | 0  | 0 | 0 | 0 |
| <b>Luteovirus</b>            | 0 | 0  | 2 | 1 | 0  | 1 | 0 | 0 |
| <b>Orthohepevirus</b>        | 0 | 0  | 1 | 0 | 0  | 2 | 0 | 0 |
| <b>Pipapillomavirus</b>      | 0 | 0  | 2 | 0 | 0  | 0 | 0 | 1 |
| <b>Dyomupapillomavirus</b>   | 0 | 0  | 1 | 0 | 0  | 0 | 1 | 5 |
| <b>Alphatristromavirus</b>   | 0 | 0  | 1 | 0 | 2  | 0 | 0 | 1 |
| <b>Kleczkowskavirus</b>      | 0 | 0  | 0 | 2 | 0  | 0 | 0 | 0 |
| <b>Marthavirus</b>           | 0 | 0  | 0 | 1 | 1  | 0 | 3 | 0 |
| <b>Gorjumvirus</b>           | 0 | 0  | 0 | 1 | 0  | 0 | 0 | 0 |
| <b>Perisivirus</b>           | 0 | 0  | 0 | 2 | 0  | 1 | 0 | 2 |
| <b>Rotavirus</b>             | 0 | 0  | 0 | 1 | 0  | 1 | 2 | 1 |
| <b>Seadornavirus</b>         | 0 | 0  | 0 | 1 | 0  | 0 | 0 | 0 |
| <b>Orthohantavirus</b>       | 0 | 0  | 0 | 2 | 0  | 6 | 1 | 1 |
| <b>Sripuvirus</b>            | 0 | 0  | 0 | 2 | 0  | 0 | 2 | 0 |
| <b>Bymovirus</b>             | 0 | 0  | 0 | 1 | 1  | 0 | 0 | 0 |
| <b>Trichovirus</b>           | 0 | 0  | 0 | 1 | 0  | 0 | 1 | 0 |
| <b>Marafivirus</b>           | 0 | 0  | 0 | 1 | 0  | 1 | 0 | 0 |
| <b>Allexivirus</b>           | 0 | 0  | 0 | 1 | 0  | 0 | 0 | 0 |
| <b>Siadenovirus</b>          | 0 | 0  | 0 | 1 | 0  | 0 | 1 | 0 |
| <b>Omikronpapillomavirus</b> | 0 | 0  | 0 | 1 | 0  | 0 | 0 | 0 |
| <b>Equispumavirus</b>        | 0 | 0  | 0 | 1 | 0  | 0 | 0 | 0 |
| <b>Alphatrevirus</b>         | 0 | 0  | 0 | 2 | 11 | 2 | 6 | 0 |
| <b>Getseptimavirus</b>       | 0 | 0  | 0 | 0 | 1  | 0 | 0 | 0 |
| <b>Sitaravirus</b>           | 0 | 0  | 0 | 0 | 1  | 0 | 0 | 0 |
| <b>Cbastvirus</b>            | 0 | 0  | 0 | 0 | 1  | 0 | 1 | 1 |
| <b>Marburgvirus</b>          | 0 | 0  | 0 | 0 | 1  | 0 | 0 | 0 |
| <b>Hepatovirus</b>           | 0 | 0  | 0 | 0 | 1  | 0 | 1 | 0 |
| <b>Mosavirus</b>             | 0 | 0  | 0 | 0 | 1  | 0 | 0 | 0 |

|                              |   |   |   |   |   |   |   |    |
|------------------------------|---|---|---|---|---|---|---|----|
| <b>Comovirus</b>             | 0 | 0 | 0 | 0 | 1 | 0 | 0 | 0  |
| <b>Sobemovirus</b>           | 0 | 0 | 0 | 0 | 2 | 0 | 0 | 0  |
| <b>Invictavirus</b>          | 0 | 0 | 0 | 0 | 2 | 0 | 0 | 0  |
| <b>Pomovirus</b>             | 0 | 0 | 0 | 0 | 1 | 0 | 0 | 0  |
| <b>Alphapartitivirus</b>     | 0 | 0 | 0 | 0 | 1 | 1 | 3 | 0  |
| <b>Vesivirus</b>             | 0 | 0 | 0 | 0 | 1 | 0 | 0 | 0  |
| <b>Xipapillomavirus</b>      | 0 | 0 | 0 | 0 | 1 | 0 | 0 | 0  |
| <b>Dyrorhopapillomavirus</b> | 0 | 0 | 0 | 0 | 1 | 0 | 0 | 0  |
| <b>Amdoparvovirus</b>        | 0 | 0 | 0 | 0 | 1 | 2 | 0 | 3  |
| <b>Jedunavirus</b>           | 0 | 0 | 0 | 0 | 0 | 1 | 0 | 31 |
| <b>Traversvirus</b>          | 0 | 0 | 0 | 0 | 0 | 1 | 0 | 0  |
| <b>Torovirus</b>             | 0 | 0 | 0 | 0 | 0 | 1 | 0 | 0  |
| <b>Bafinivirus</b>           | 0 | 0 | 0 | 0 | 0 | 1 | 1 | 6  |
| <b>Wuhivirus</b>             | 0 | 0 | 0 | 0 | 0 | 1 | 0 | 0  |
| <b>Vesiculovirus</b>         | 0 | 0 | 0 | 0 | 0 | 4 | 0 | 0  |
| <b>Respirovirus</b>          | 0 | 0 | 0 | 0 | 0 | 1 | 0 | 10 |
| <b>Anphevirus</b>            | 0 | 0 | 0 | 0 | 0 | 1 | 0 | 0  |
| <b>Betaendornavirus</b>      | 0 | 0 | 0 | 0 | 0 | 1 | 0 | 1  |
| <b>Coltivirus</b>            | 0 | 0 | 0 | 0 | 0 | 1 | 0 | 0  |
| <b>Cypovirus</b>             | 0 | 0 | 0 | 0 | 0 | 1 | 2 | 1  |
| <b>Oryzavirus</b>            | 0 | 0 | 0 | 0 | 0 | 1 | 0 | 0  |
| <b>Hypovirus</b>             | 0 | 0 | 0 | 0 | 0 | 2 | 0 | 0  |
| <b>Ampelovirus</b>           | 0 | 0 | 0 | 0 | 0 | 1 | 1 | 0  |
| <b>Lineavirus</b>            | 0 | 0 | 0 | 0 | 0 | 5 | 2 | 1  |
| <b>Erythroparvovirus</b>     | 0 | 0 | 0 | 0 | 0 | 1 | 0 | 0  |
| <b>Toursvirus</b>            | 0 | 0 | 0 | 0 | 0 | 3 | 0 | 0  |
| <b>Corticovirus</b>          | 0 | 0 | 0 | 0 | 0 | 1 | 0 | 0  |
| <b>Enterovirus</b>           | 0 | 0 | 0 | 0 | 0 | 0 | 2 | 3  |
| <b>Parechovirus</b>          | 0 | 0 | 0 | 0 | 0 | 0 | 1 | 0  |
| <b>Sopolycivirus</b>         | 0 | 0 | 0 | 0 | 0 | 0 | 1 | 2  |
| <b>Dinovernavirus</b>        | 0 | 0 | 0 | 0 | 0 | 0 | 5 | 0  |
| <b>Ipomovirus</b>            | 0 | 0 | 0 | 0 | 0 | 0 | 1 | 0  |
| <b>Hepacivirus</b>           | 0 | 0 | 0 | 0 | 0 | 0 | 1 | 1  |
| <b>Rubivirus</b>             | 0 | 0 | 0 | 0 | 0 | 0 | 3 | 0  |
| <b>Panicovirus</b>           | 0 | 0 | 0 | 0 | 0 | 0 | 1 | 0  |
| <b>Spiromicrovirus</b>       | 0 | 0 | 0 | 0 | 0 | 0 | 2 | 0  |
| <b>Deltapapillomavirus</b>   | 0 | 0 | 0 | 0 | 0 | 0 | 1 | 0  |
| <b>Taupapillomavirus</b>     | 0 | 0 | 0 | 0 | 0 | 0 | 1 | 0  |
| <b>Epsilonretrovirus</b>     | 0 | 0 | 0 | 0 | 0 | 0 | 1 | 0  |
| <b>Prosimiispumavirus</b>    | 0 | 0 | 0 | 0 | 0 | 0 | 1 | 0  |

|                            |   |   |   |   |   |   |   |   |   |
|----------------------------|---|---|---|---|---|---|---|---|---|
| <b>Iteradensovirus</b>     | 0 | 0 | 0 | 0 | 0 | 0 | 0 | 1 | 1 |
| <b>Orchidvirus</b>         | 0 | 0 | 0 | 0 | 0 | 0 | 0 | 0 | 1 |
| <b>Cepunavirus</b>         | 0 | 0 | 0 | 0 | 0 | 0 | 0 | 0 | 1 |
| <b>Jonvirus</b>            | 0 | 0 | 0 | 0 | 0 | 0 | 0 | 0 | 1 |
| <b>Megrivirus</b>          | 0 | 0 | 0 | 0 | 0 | 0 | 0 | 0 | 1 |
| <b>Harkavirus</b>          | 0 | 0 | 0 | 0 | 0 | 0 | 0 | 0 | 1 |
| <b>Infratovirus</b>        | 0 | 0 | 0 | 0 | 0 | 0 | 0 | 0 | 1 |
| <b>Amalgavirus</b>         | 0 | 0 | 0 | 0 | 0 | 0 | 0 | 0 | 1 |
| <b>Tombusvirus</b>         | 0 | 0 | 0 | 0 | 0 | 0 | 0 | 0 | 1 |
| <b>Bovispumavirus</b>      | 0 | 0 | 0 | 0 | 0 | 0 | 0 | 0 | 1 |
| <b>Dyoxipapillomavirus</b> | 0 | 0 | 0 | 0 | 0 | 0 | 0 | 0 | 1 |
| <b>Thetapapillomavirus</b> | 0 | 0 | 0 | 0 | 0 | 0 | 0 | 0 | 1 |
| <b>Gammapolyomavirus</b>   | 0 | 0 | 0 | 0 | 0 | 0 | 0 | 0 | 1 |
| <b>Chapparvovirus</b>      | 0 | 0 | 0 | 0 | 0 | 0 | 0 | 0 | 1 |
| <b>Deltalipothrixvirus</b> | 0 | 0 | 0 | 0 | 0 | 0 | 0 | 0 | 2 |
| <b>Iotatorquevirus</b>     | 0 | 0 | 0 | 0 | 0 | 0 | 0 | 0 | 2 |



Table S3

| Gene group                      | CP1       | CP3        | CP4       | CP5       | CP6        | CP7       | CP8        | Seafield |
|---------------------------------|-----------|------------|-----------|-----------|------------|-----------|------------|----------|
| aac(3)-I_1_AJ877225             | 0.00000   | 29.35374   | 0.00000   | 36.41902  | 2.40914    | 10.44301  | 20.17039   | 29.47549 |
| aac(3)-Ia_1_X15852              | 8.30881   | 31.89019   | 7.02658   | 49.30890  | 5.50686    | 14.03017  | 24.73817   | 41.30760 |
| aac(3)-Ib_1_L06157              | 51.52712  | 47.49352   | 1.24699   | 13.99149  | 13.97678   | 31.61560  | 38.06324   | 0.00000  |
| aac(3)-Ib-aac(6)-Ib_1_AF355189  | 6.03360   | 1.94023    | 0.00000   | 0.00000   | 0.00000    | 1.10442   | 2.10311    | 0.00000  |
| aac(3)-Ic_1_AJ511268            | 0.00000   | 0.00000    | 0.00000   | 0.00000   | 1.18923    | 1.76742   | 0.00000    | 0.00000  |
| aac(3)-IIa_4_L22613             | 99.97203  | 28.98846   | 17.43179  | 951.20903 | 42.93649   | 266.85033 | 208.66258  | 18.90360 |
| aac(3)-IIb_1_M97172             | 11.32049  | 0.00000    | 1.63494   | 0.00000   | 2.76605    | 2.39802   | 0.00000    | 0.00000  |
| aac(3)-IIIb_2_LLLC01000048      | 126.17946 | 15.40683   | 15.00300  | 30.56341  | 66.01921   | 48.72624  | 57.21534   | 0.00000  |
| aac(3)-IIIc_1_L06161            | 86.62525  | 18.36439   | 11.91172  | 18.03609  | 32.67402   | 26.20698  | 40.88866   | 0.00000  |
| aac(3)-IVa_1_X01385             | 0.00000   | 0.00000    | 0.00000   | 0.00000   | 0.00000    | 0.00000   | 0.00000    | 0.36433  |
| aac(6)-30-aac(6)-Ib_1_AJ584652  | 6.89286   | 1083.81965 | 1.90081   | 62.76470  | 6.81004    | 6.46623   | 59.15806   | 0.00000  |
| aac(6)-31_1_AM283489            | 56.70801  | 55.35438   | 6.37911   | 11.78882  | 5.66602    | 6.14853   | 13.99923   | 0.00000  |
| aac(6)-32_1_EF614235            | 0.00000   | 0.00000    | 0.00000   | 0.00000   | 0.67282    | 0.41665   | 1.34879    | 0.00000  |
| aac(6)-aph(2)_1_M13771          | 8.45415   | 2.95443    | 1.82411   | 8.05131   | 4.91846    | 10.41527  | 8.37009    | 0.00000  |
| aac(6)-Ib-cr_1_DQ303918         | 1.17578   | 43.03644   | 13.84966  | 342.28918 | 37.69162   | 129.52483 | 322.19043  | 0.00000  |
| aac(6)-Ib-Suzhou_1_EU085533     | 120.25517 | 1966.62524 | 42.31476  | 505.16482 | 34.89546   | 170.37656 | 567.09609  | 0.00000  |
| aac(6)-Ib_1_X55353              | 0.00000   | 0.00000    | 0.00000   | 0.00000   | 0.00000    | 0.00000   | 1.21473    | 0.00000  |
| aac(6)-Ii_1_L12710              | 0.00000   | 0.00000    | 0.53605   | 11.27729  | 15.98417   | 0.00000   | 0.00000    | 0.00000  |
| aac(6)-IIa_1_M29695             | 19.36426  | 7.65137    | 2.25357   | 5.51207   | 7.06465    | 77.16268  | 15.39204   | 0.00000  |
| aac(6)-Im_1_AF337947            | 0.00000   | 0.00000    | 0.00000   | 0.00000   | 0.00000    | 1.20571   | 0.00000    | 0.00000  |
| aac(6)-Iz_1_AF140221            | 0.00000   | 0.00000    | 0.00000   | 0.00000   | 0.00000    | 0.00000   | 3.43122    | 0.00000  |
| aadA10_1_U37105                 | 1.53690   | 1.97435    | 2.73471   | 7.24887   | 1.56710    | 2.10721   | 0.52798    | 7.27555  |
| aadA11_1_AY144590               | 124.71104 | 81.62007   | 51.64048  | 115.48550 | 30.93333   | 55.36531  | 65.58024   | 48.15585 |
| aadA13_2_NC010643               | 3.45957   | 12.92349   | 2.39710   | 4.83761   | 7.60405    | 3.12954   | 3.09010    | 3.22042  |
| aadA15_1_DQ393783               | 2.74924   | 38.77337   | 5.12862   | 50.68199  | 4.73279    | 11.37140  | 24.66794   | 5.42859  |
| aadA16_1_EU675686               | 2.68056   | 0.00000    | 0.00000   | 1.37755   | 0.00000    | 3.82663   | 0.00000    | 1.60323  |
| aadA4_1_Z50802                  | 46.36223  | 7.13957    | 3.63666   | 12.55510  | 13.84342   | 3.86862   | 16.63132   | 1.99048  |
| aadA7_1_AF224733                | 0.00000   | 0.00000    | 1.38294   | 6.57185   | 0.00000    | 0.92727   | 0.00000    | 0.00000  |
| aadA8b_1_AY139603               | 45.82913  | 2.83829    | 9.91623   | 16.42325  | 3.29261    | 7.45671   | 25.29300   | 2.24802  |
| aadD_1_AF181950                 | 0.00000   | 0.00000    | 0.00000   | 0.00000   | 0.00000    | 0.00000   | 0.00000    | 0.55879  |
| ampS_1_X80276                   | 0.00000   | 0.00000    | 1.48070   | 4.48939   | 0.00000    | 1.16346   | 1.55088    | 5.61210  |
| ant(2)-Ia_5_AY139594            | 429.10371 | 982.18550  | 123.17177 | 603.57369 | 1356.26028 | 958.55538 | 2059.37018 | 4.94622  |
| ant(3)-Ia_1_X02340              | 71.97034  | 276.03906  | 14.49497  | 176.88704 | 49.51046   | 73.79634  | 128.38703  | 6.71997  |
| ant(3)-Ii-aac(6)-IId_1_AF453998 | 52.69885  | 66.58515   | 12.05065  | 12.16584  | 8.14839    | 17.14351  | 25.05379   | 0.00000  |
| ant(6)-Ia_2_KF421157            | 3.82295   | 0.00000    | 0.00000   | 0.00000   | 0.00000    | 0.00000   | 1.32510    | 0.41311  |
| ant(6)-Ia_3_KF864551            | 39.29130  | 8.29650    | 3.22463   | 3.23445   | 5.27608    | 28.75140  | 7.82148    | 0.90570  |
| ant(6)-Ia_5_AB247327            | 0.48811   | 0.95339    | 0.00000   | 8.81428   | 1.48915    | 1.93334   | 0.62975    | 0.00000  |
| ant(6)-Ib_1_FN594949            | 0.00000   | 0.40403    | 0.00000   | 0.00000   | 0.00000    | 1.23974   | 0.00000    | 0.00000  |
| ant(9)-Ia_1_X02588              | 0.00000   | 0.00000    | 0.00000   | 0.18605   | 0.00000    | 0.00000   | 0.00000    | 0.00000  |
| aph(2)-Id_1_AF016483            | 0.00000   | 0.00000    | 0.00000   | 0.00000   | 0.00000    | 0.00000   | 0.00000    | 1.41826  |
| aph(2)-If_1_KF652097            | 0.00000   | 0.00000    | 0.00000   | 0.00000   | 0.00000    | 0.00000   | 2.07219    | 0.00000  |
| aph(3)-Ib_1_M28829              | 90.62662  | 48.55954   | 20.08600  | 261.54656 | 70.94466   | 79.32271  | 92.72321   | 33.69524 |
| aph(3)-Ia_2_EU287476            | 102.70608 | 284.52367  | 38.85993  | 178.34610 | 408.76846  | 209.75786 | 177.26900  | 1.70591  |
| aph(3)-Ib_2_AJ744860            | 1.93329   | 0.00000    | 0.00000   | 0.00000   | 0.00000    | 1.53025   | 0.70152    | 0.00000  |
| aph(3)-IIa_2_V00618             | 3.41062   | 2.23472    | 3.97939   | 1.14525   | 4.69707    | 0.87260   | 2.32632    | 0.00000  |
| aph(3)-IIb_1_X90856             | 0.00000   | 5.47687    | 0.00000   | 1.08309   | 0.00000    | 0.00000   | 0.00000    | 0.00000  |
| aph(3)-IIc_1_AM743169           | 0.00000   | 0.79948    | 0.00000   | 0.00000   | 0.00000    | 0.00000   | 0.00000    | 0.00000  |
| aph(3)-III_1_M26832             | 1.17821   | 2.45274    | 0.64781   | 9.07040   | 3.28795    | 5.70096   | 1.77244    | 0.35917  |
| aph(3)-VI_1_KC170992            | 3.91863   | 18.27709   | 0.42446   | 0.51360   | 0.71811    | 24.72468  | 4.34694    | 0.86944  |
| aph(3)-XV_2_GQ626879            | 0.00000   | 0.65079    | 1.88765   | 0.45581   | 0.00000    | 0.00000   | 0.00000    | 0.00000  |
| aph(6)-Ic_1_X01702              | 5.72384   | 5.24741    | 0.00000   | 3.77376   | 0.00000    | 2.65592   | 3.79319    | 0.00000  |
| aph(6)-Id_2_AF024602            | 176.37927 | 104.23454  | 36.52218  | 542.84383 | 144.88907  | 148.31322 | 199.62756  | 69.33660 |
| ARR-3_4_FM207631                | 1.72501   | 0.55860    | 0.33873   | 0.00000   | 0.60173    | 11.49803  | 2.67610    | 0.00000  |
| ARR-6_3_JF922883                | 5.98552   | 0.28696    | 0.00000   | 0.72356   | 2.57600    | 44.61414  | 10.30375   | 0.00000  |

|                           |            |            |           |            |            |            |            |           |
|---------------------------|------------|------------|-----------|------------|------------|------------|------------|-----------|
| blaACI-1_1_AJ007350       | 43.53296   | 3.04082    | 0.00000   | 0.00000    | 15.83202   | 2.97499    | 4.37764    | 0.00000   |
| blaACT-14_1_JX440354      | 0.00000    | 0.00000    | 0.00000   | 0.00000    | 0.00000    | 0.00000    | 0.00000    | 0.00000   |
| blaACT-6_1_FJ237366       | 14.67802   | 0.00000    | 0.00000   | 0.00000    | 6.72456    | 9.77193    | 0.00000    | 0.00000   |
| blaACT-9_1_HQ693810       | 0.00000    | 0.00000    | 0.00000   | 0.00000    | 0.00000    | 8.45648    | 0.00000    | 0.00000   |
| blaADC-25_1_EF016355      | 0.00000    | 0.00000    | 0.00000   | 0.00000    | 0.52674    | 0.00000    | 0.00000    | 0.99147   |
| blaAER-1_1_U14748         | 0.00000    | 1.04186    | 0.00000   | 0.00000    | 0.00000    | 0.00000    | 0.00000    | 1.17026   |
| blaBEL-2_1_FJ666063       | 0.00000    | 20.14009   | 2.84964   | 0.00000    | 5.42376    | 0.00000    | 7.39067    | 0.00000   |
| blaBKC-1_1_KP689347       | 114.55980  | 21.25186   | 34.79459  | 169.25953  | 11.44631   | 51.30441   | 125.97821  | 0.00000   |
| blaCARB-16_1_HF953351     | 3.46247    | 0.00000    | 0.00000   | 0.00000    | 0.00000    | 34.95639   | 3.82904    | 11.34058  |
| blaCARB-2_1_M69058        | 2.38818    | 2.99873    | 0.00000   | 7.93909    | 7.75261    | 3.36055    | 7.00886    | 0.00000   |
| blaCMY-93_1_KF992025      | 0.00000    | 0.00000    | 0.00000   | 20.62473   | 0.00000    | 0.00000    | 0.00000    | 0.00000   |
| blaCMY-94_1_JX514368      | 0.00000    | 0.00000    | 10.94796  | 3.49635    | 16.58032   | 5.77191    | 10.56852   | 0.00000   |
| blaCTX-M-60_1_AM411407    | 182.31766  | 2.67083    | 0.00000   | 32.92303   | 0.00000    | 3.80074    | 5.42822    | 0.00000   |
| blaCTX-M-83_1_FJ214366    | 13.67513   | 0.00000    | 2.26760   | 16.46308   | 6.71371    | 0.00000    | 10.85748   | 0.00000   |
| blaDES-1_1_AF426161       | 0.00000    | 0.00000    | 0.00000   | 0.00000    | 0.00000    | 0.00000    | 1.03875    | 0.00000   |
| blaEBR-1_1_AF416700       | 0.00000    | 0.00000    | 0.00000   | 0.00000    | 0.00000    | 0.00000    | 0.00000    | 59.99243  |
| blaFOX-5_1_AY007369       | 0.00000    | 0.00000    | 7.39566   | 19.17625   | 25.91822   | 52.68766   | 41.73452   | 55.69844  |
| blaIMP-13_1_AJ550807      | 39.08814   | 40.08300   | 2.77781   | 257.82075  | 52.87058   | 33.17655   | 292.60959  | 0.00000   |
| blaIMP-6_1_AB753460       | 152.75347  | 8344.83416 | 90.35207  | 3540.85297 | 111.11812  | 540.86614  | 2743.77219 | 0.00000   |
| blaIMP-68_1_MF669572      | 0.00000    | 0.00000    | 0.00000   | 8.96519    | 0.00000    | 0.00000    | 0.00000    | 0.00000   |
| blaKPC-28_1_KY282958      | 0.00000    | 0.00000    | 0.00000   | 0.00000    | 0.00000    | 43.62886   | 0.00000    | 0.00000   |
| blaLCR-1_1_X56809         | 0.00000    | 0.00000    | 0.00000   | 0.00000    | 2.26530    | 0.47252    | 0.00000    | 0.00000   |
| blaLEN7_1_AJ635425        | 10.91318   | 0.00000    | 0.00000   | 0.00000    | 0.00000    | 3.59704    | 0.00000    | 0.00000   |
| blaMOX-4_1_FJ262599       | 1.67333    | 5.77002    | 0.00000   | 0.28527    | 0.48749    | 0.00000    | 0.84312    | 16.40199  |
| blaOKP-B-8_1_AM051157     | 0.00000    | 0.00000    | 0.00000   | 0.00000    | 0.00000    | 1.18653    | 3.08109    | 0.00000   |
| blaOXA-18_1_U85514        | 0.00000    | 15.49056   | 0.00000   | 0.00000    | 0.00000    | 6.70255    | 8.50897    | 0.00000   |
| blaOXA-198_1_HQ634775     | 106.97053  | 4.61326    | 0.00000   | 5.90828    | 4.25951    | 0.00000    | 2.67887    | 0.00000   |
| blaOXA-209_1_JF268688     | 0.00000    | 0.00000    | 1.38227   | 0.00000    | 0.00000    | 0.00000    | 15.31847   | 0.00000   |
| blaOXA-210_1_JF795487     | 231.74254  | 359.77401  | 49.62260  | 186.25233  | 160.23349  | 94.24912   | 581.22010  | 12.94298  |
| blaOXA-233_1_KJ657570     | 356.90019  | 196.21192  | 37.05201  | 75.05037   | 55.48289   | 247.37532  | 176.69224  | 11.29885  |
| blaOXA-275_1_APPJ01000001 | 0.00000    | 0.00000    | 0.00000   | 4.43399    | 0.00000    | 1.91332    | 2.34223    | 14.38689  |
| blaOXA-285_1_APRY01000059 | 0.00000    | 0.00000    | 4.84388   | 0.00000    | 0.00000    | 0.00000    | 0.00000    | 1.94034   |
| blaOXA-296_1_APOH01000009 | 0.00000    | 20.77895   | 62.38595  | 0.51114    | 1.31024    | 0.59500    | 8.18877    | 16.74021  |
| blaOXA-299_1_APQD01000016 | 0.00000    | 1.87043    | 0.48519   | 0.00000    | 0.00000    | 0.00000    | 2.11194    | 0.00000   |
| blaOXA-334_1_KF203108     | 86.55822   | 488.30516  | 448.24214 | 409.78822  | 278.44336  | 350.13284  | 487.78820  | 235.88505 |
| blaOXA-347_1_JN086160     | 7.76831    | 4.98971    | 2.80913   | 3.57569    | 3.28155    | 4.37250    | 34.42654   | 0.00000   |
| blaOXA-37_1_AY007784      | 5.66230    | 0.00000    | 0.00000   | 0.00000    | 0.00000    | 4.15709    | 1.53926    | 1.42594   |
| blaOXA-427_1_KX827604     | 10.23185   | 11.99117   | 0.00000   | 10.58213   | 10.33356   | 37.11444   | 20.10606   | 65.68406  |
| blaOXA-437_1_KP410856     | 0.00000    | 46.15769   | 0.26657   | 11.56788   | 79.48649   | 404.72246  | 27.12236   | 0.00000   |
| blaOXA-444_1_CP010800     | 0.00000    | 0.00000    | 0.00000   | 0.84799    | 0.00000    | 0.00000    | 0.00000    | 0.00000   |
| blaOXA-45_1_AJ519683      | 0.00000    | 0.00000    | 12.58597  | 2.93185    | 0.00000    | 0.00000    | 0.00000    | 0.00000   |
| blaOXA-46_1_AF317511      | 0.67701    | 0.00000    | 2.29627   | 2.72802    | 0.00000    | 0.00000    | 0.00000    | 1.38138   |
| blaOXA-47_1_AY237830      | 19.99246   | 1.92933    | 8.41080   | 14.06800   | 22.69263   | 27.77083   | 63.95784   | 0.68723   |
| blaOXA-486_1_AY597426     | 0.00000    | 0.00000    | 0.00000   | 0.00000    | 0.00000    | 0.00000    | 4.01831    | 0.00000   |
| blaOXA-490_1_KU721147     | 0.00000    | 0.00000    | 0.00000   | 0.00000    | 0.00000    | 0.00000    | 0.98238    | 5.66778   |
| blaOXA-5_1_AF347074       | 4.66010    | 1.67075    | 0.00000   | 23.59989   | 0.46445    | 0.69026    | 2.19074    | 2.75244   |
| blaOXA-552_1_KY682754     | 0.00000    | 0.00000    | 0.00000   | 0.00000    | 0.00000    | 0.00000    | 0.00000    | 8.37443   |
| blaOXA-58_1_AY665723      | 1147.38412 | 2331.53401 | 195.32032 | 2250.98072 | 2650.79821 | 2285.38912 | 3215.57473 | 118.12978 |
| blaOXA-9_1_KQ089875       | 3.46586    | 0.00000    | 0.00000   | 0.00000    | 0.00000    | 1.79385    | 0.00000    | 0.00000   |
| blaOXY-3-1_1_AF491278     | 0.00000    | 0.00000    | 0.00000   | 0.00000    | 0.00000    | 0.00000    | 0.00000    | 0.00000   |
| blaOXY-6-4_4_AJ871877     | 11.16202   | 0.00000    | 9.25439   | 85.66487   | 0.00000    | 16.87020   | 14.40104   | 0.00000   |
| blaPAO_2_FJ666065         | 0.00000    | 0.00000    | 0.00000   | 0.00000    | 0.00000    | 0.00000    | 9.29360    | 0.00000   |
| blaPER-7_1_HQ713678       | 0.00000    | 0.00000    | 0.00000   | 0.00000    | 0.00000    | 11.02797   | 0.00000    | 0.00000   |
| blaPLA-4A_1_AY507664      | 0.00000    | 0.00000    | 0.00000   | 0.00000    | 0.00000    | 0.00000    | 0.00000    | 0.00000   |
| blaRAHN-1_1_GU645205      | 0.00000    | 0.00000    | 0.00000   | 0.00000    | 0.00000    | 0.00000    | 0.00000    | 0.96468   |
| blaSGM-5_1_NG049987       | 0.00000    | 0.00000    | 0.00000   | 0.00000    | 0.00000    | 1.17858    | 0.00000    | 0.00000   |
| blaSGM-6_1_NG049988       | 5.92994    | 2.12021    | 0.00000   | 2.15321    | 0.00000    | 0.00000    | 2.15457    | 0.00000   |

|                        |           |           |           |           |           |           |           |           |
|------------------------|-----------|-----------|-----------|-----------|-----------|-----------|-----------|-----------|
| blaSHV-129_1_GU827715  | 105.52083 | 1.05625   | 0.55510   | 3.84689   | 2.11305   | 9.01859   | 31.84311  | 0.00000   |
| blaSST-1_1_AB008455    | 0.00000   | 0.00000   | 0.00000   | 10.89047  | 0.00000   | 0.00000   | 0.00000   | 0.00000   |
| blaTEM-4_1_LK391770    | 185.48938 | 27.23164  | 42.39038  | 674.22610 | 356.23829 | 119.31872 | 136.77908 | 11.19482  |
| blaTER-2_1_FJ263090    | 0.00000   | 0.00000   | 0.00000   | 0.00000   | 0.00000   | 0.00000   | 0.00000   | 0.00000   |
| blaVEB-1_1_HM370393    | 0.00000   | 0.00000   | 0.00000   | 0.00000   | 0.00000   | 10.68834  | 24.16974  | 0.00000   |
| blaVIM-42_1_KP071470   | 297.29205 | 121.94347 | 42.43807  | 63.02172  | 93.82729  | 146.31697 | 167.79185 | 18.09287  |
| cat_2_M35190           | 7.34744   | 3.19432   | 1.29695   | 0.00000   | 0.89764   | 16.45348  | 1.76418   | 0.57200   |
| cat(pC194)_1_NC_002013 | 0.00000   | 0.00000   | 0.28254   | 0.00000   | 0.00000   | 0.00000   | 0.00000   | 0.00000   |
| cat(pC233)_1_AY355285  | 0.00000   | 0.00000   | 0.00000   | 0.00000   | 2.80927   | 0.35685   | 0.00000   | 0.00000   |
| catA1_1_V00622         | 14.86437  | 0.00000   | 0.61310   | 1.71059   | 1.06084   | 2.31238   | 1.86811   | 0.00000   |
| catA2_1_X53796         | 12.51670  | 0.00000   | 0.00000   | 0.00000   | 0.00000   | 0.00000   | 0.00000   | 0.00000   |
| catB1_1_M58472         | 0.00000   | 0.00000   | 0.00000   | 0.00000   | 0.00000   | 0.00000   | 0.00000   | 0.00000   |
| catB2_1_AF047479       | 0.00000   | 0.00000   | 0.00000   | 0.00000   | 0.58992   | 0.29224   | 0.00000   | 0.00000   |
| catB3_2_U13880         | 4.12771   | 2.66973   | 0.17434   | 1.84109   | 1.69601   | 3.43387   | 14.46929  | 0.33832   |
| catB9_1_AF462019       | 0.00000   | 0.00000   | 0.00000   | 0.00000   | 0.00000   | 0.00000   | 0.00000   | 0.33993   |
| catP_1_U15027          | 0.00000   | 0.00000   | 0.00000   | 0.00000   | 0.00000   | 0.88938   | 3.88120   | 0.00000   |
| catQ_1_M55620          | 3.95885   | 0.00000   | 0.00000   | 0.00000   | 0.00000   | 0.00000   | 0.00000   | 0.00000   |
| catS_1_X74948          | 5.21045   | 1.76145   | 1.27107   | 0.37011   | 0.75898   | 3.57197   | 1.61100   | 0.00000   |
| cepA_6_FR688022        | 8.78973   | 0.00000   | 0.00000   | 0.00000   | 0.00000   | 0.30729   | 0.00000   | 0.00000   |
| cfr(C)_2_CANB01000378  | 92.32861  | 33.39631  | 13.32525  | 0.00000   | 30.21875  | 126.89133 | 44.11879  | 7.70253   |
| cfxA4_1_AY769933       | 15.36126  | 28.52895  | 6.05487   | 2.03585   | 12.51489  | 25.03882  | 6.83757   | 0.77593   |
| cfxA6_1_GQ342996       | 24.94644  | 29.19235  | 8.64254   | 1.97453   | 3.98349   | 36.35731  | 6.27793   | 1.11093   |
| cmlA1_1_M64556         | 0.00000   | 0.00000   | 0.00000   | 0.00000   | 3.88976   | 0.33034   | 0.00000   | 0.00000   |
| cmlB1_1_AM296481       | 42.28959  | 91.38679  | 11.82621  | 25.05606  | 197.73276 | 57.82778  | 68.83347  | 0.78942   |
| cmx_1_U85507           | 0.79650   | 0.40531   | 1.15739   | 2.16780   | 0.00000   | 0.00000   | 13.92910  | 0.00000   |
| cphA1_4_AY261376       | 0.00000   | 0.00000   | 0.00000   | 0.00000   | 0.00000   | 1.69272   | 1.15121   | 1.58635   |
| cphA6_1_AY227052       | 0.00000   | 0.00000   | 0.00000   | 0.00000   | 0.00000   | 1.26954   | 1.09365   | 1.25975   |
| dfrA1_5_EU089668       | 2.39214   | 40.31495  | 1.00890   | 55.70420  | 0.00000   | 4.19546   | 15.23537  | 0.22590   |
| dfrA10_1_L06418        | 0.00000   | 0.00000   | 0.91313   | 0.00000   | 0.00000   | 0.00000   | 0.00000   | 0.00000   |
| dfrA12_1_FJ763641      | 0.00000   | 0.00000   | 0.22160   | 0.80444   | 0.00000   | 0.00000   | 0.00000   | 0.00000   |
| dfrA14_2_Z50805        | 3.52283   | 0.00000   | 0.00000   | 0.68888   | 0.00000   | 0.58320   | 0.00000   | 0.60013   |
| dfrA16_3_AY878718      | 16.64099  | 0.27425   | 0.00000   | 0.30733   | 0.39390   | 0.68298   | 3.43725   | 0.00000   |
| dfrA17_8_AM932673      | 13.72881  | 0.27425   | 0.00000   | 0.69150   | 3.44663   | 0.48784   | 0.00000   | 0.30121   |
| dfrA26_1_AM403715      | 0.00000   | 0.00000   | 0.00000   | 0.00000   | 0.00000   | 0.00000   | 0.00000   | 0.00000   |
| dfrA28_2_FM877476      | 0.00000   | 0.00000   | 0.00000   | 0.00000   | 0.00000   | 2.14651   | 0.00000   | 0.00000   |
| dfrA5_2_FJ001870       | 1.66410   | 2.28543   | 0.62086   | 0.30733   | 34.17084  | 2.53679   | 14.67798  | 0.00000   |
| dfrA7_2_AJ884724       | 0.31202   | 0.00000   | 0.00000   | 0.00000   | 0.00000   | 0.00000   | 0.00000   | 0.00000   |
| dfrA7_5_AJ419170       | 3.54606   | 4.94134   | 0.00000   | 5.04755   | 4.09449   | 0.00000   | 4.09438   | 1.31500   |
| dfrB1_1_U36276         | 0.00000   | 3.06933   | 0.00000   | 0.00000   | 0.00000   | 0.00000   | 0.00000   | 0.00000   |
| dfrB2_1_J01773         | 0.00000   | 0.00000   | 0.00000   | 0.00000   | 0.00000   | 0.00000   | 0.00000   | 0.30121   |
| dfrB3_2_FM877478       | 0.00000   | 0.00000   | 0.00000   | 0.00000   | 0.00000   | 0.00000   | 0.00000   | 0.45181   |
| dfrG_1_AB205645        | 0.00000   | 1.56621   | 0.44321   | 0.00000   | 9.84157   | 2.41453   | 0.61895   | 0.00000   |
| ere(A)_5_FN396877      | 30.58136  | 14.05638  | 8.28437   | 5.41844   | 1.21437   | 3.64717   | 17.00498  | 3.07598   |
| ere(D)_1_KP265721      | 6.79015   | 4.97944   | 2.69825   | 20.95504  | 3.38571   | 6.52065   | 59.32201  | 12.01402  |
| erm(A)_1_X03216        | 4.44498   | 0.00000   | 0.00000   | 1.79110   | 0.00000   | 0.00000   | 0.00000   | 0.00000   |
| erm(A)_2_AF002716      | 0.00000   | 0.00000   | 0.00000   | 0.00000   | 0.00000   | 0.00000   | 1.44374   | 0.00000   |
| erm(B)_9_AF299292      | 121.08273 | 94.83569  | 126.13263 | 151.44252 | 48.05188  | 258.66673 | 156.33775 | 115.44040 |
| erm(F)_1_M14730        | 284.71511 | 281.08812 | 73.29685  | 84.29571  | 74.12405  | 155.89083 | 842.41715 | 10.96189  |
| erm(G)_2_L42817        | 2.41464   | 11.67303  | 1.50148   | 0.00000   | 1.90519   | 22.65189  | 2.87569   | 0.00000   |
| erm(T)_3_AF310974      | 0.00000   | 0.00000   | 0.00000   | 0.00000   | 29.72097  | 0.00000   | 7.90814   | 1.45686   |
| erm(X)_1_M36726        | 0.00000   | 0.00000   | 0.00000   | 18.65676  | 2.62047   | 0.00000   | 0.00000   | 0.00000   |
| erm(X)_3_U21300        | 0.00000   | 0.00000   | 0.00000   | 38.42637  | 12.86379  | 0.00000   | 0.00000   | 0.00000   |
| floR_2_AF118107        | 34.97586  | 14.83621  | 16.95496  | 21.40180  | 17.97935  | 74.68133  | 30.51570  | 1.35134   |
| fosA_1_M85195          | 0.00000   | 0.00000   | 0.43176   | 1.28236   | 2.08185   | 0.00000   | 1.86059   | 2.34602   |
| fosA_2_AGDM01000012    | 0.00000   | 0.00000   | 0.00000   | 0.00000   | 0.00000   | 1.21125   | 0.62906   | 0.00000   |
| fosA_4_ACWU01000146    | 0.00000   | 0.95585   | 0.00000   | 0.00000   | 0.00000   | 0.00000   | 0.00000   | 0.00000   |
| fosA_6_ACZD01000244    | 23.33124  | 0.71775   | 0.95752   | 2.67153   | 0.00000   | 2.29815   | 12.08693  | 2.28043   |

|                           |           |            |           |            |            |            |            |            |
|---------------------------|-----------|------------|-----------|------------|------------|------------|------------|------------|
| fosA7_1_LAPJ01000014      | 5.47766   | 0.00000    | 0.00000   | 0.86097    | 0.00000    | 0.00000    | 0.00000    | 0.00000    |
| fosE_1_AB901041           | 0.00000   | 0.85594    | 0.00000   | 0.00000    | 1.61353    | 0.00000    | 0.00000    | 0.00000    |
| fosE_2_AY029772           | 0.00000   | 0.00000    | 0.00000   | 0.00000    | 0.52299    | 0.00000    | 0.00000    | 0.00000    |
| imiS_1_Y10415             | 0.00000   | 0.00000    | 0.67268   | 0.00000    | 0.00000    | 0.84570    | 2.47317    | 1.39863    |
| lnu(B)_1_AJ238249         | 5.27327   | 0.00000    | 0.00000   | 0.00000    | 3.13503    | 1.03539    | 0.00000    | 5.06094    |
| lnu(C)_1_AY928180         | 4.08334   | 6.30279    | 0.59452   | 1.10361    | 0.75438    | 9.34295    | 2.57977    | 0.57686    |
| lnu(G)_1_KX470419         | 0.00000   | 0.00000    | 0.00000   | 0.00000    | 0.34834    | 0.00000    | 0.00000    | 1.64259    |
| lsa(A)_3_AY737526         | 0.00000   | 0.00000    | 0.00000   | 0.00000    | 3.89756    | 0.00000    | 0.00000    | 0.00000    |
| lsa(E)_1_JX560992         | 31.87001  | 0.00000    | 0.00000   | 0.00000    | 9.61833    | 3.92404    | 0.00000    | 17.73833   |
| mcr-3.11_1_MG489958       | 0.00000   | 0.00000    | 0.00000   | 0.00000    | 0.00000    | 0.00000    | 0.00000    | 0.72490    |
| mcr-3.17_1_MH332767       | 0.00000   | 0.00000    | 0.00000   | 0.00000    | 0.00000    | 0.00000    | 0.00000    | 0.81370    |
| mcr-4.1_1_MF543359        | 0.57606   | 0.00000    | 0.00000   | 0.00000    | 0.94732    | 0.00000    | 0.00000    | 4.41223    |
| mcr-5.2_1_MG384740        | 0.87042   | 0.00000    | 0.00000   | 0.00000    | 0.00000    | 0.00000    | 0.00000    | 0.00000    |
| mcr-9_1_NZ_NAAN01000063.1 | 1.67373   | 0.00000    | 0.00000   | 0.85427    | 0.31694    | 0.00000    | 0.57081    | 0.44065    |
| mdf(A)_1_Y08743           | 145.61773 | 14.97105   | 8.59240   | 16.30438   | 129.46953  | 35.55777   | 52.06933   | 0.00000    |
| mef(A)_1_AJ971089         | 25.49944  | 33.22810   | 8.03377   | 0.00000    | 1.07304    | 13.06172   | 2.81991    | 56.96810   |
| mef(B)_1_FJ196385         | 10.18043  | 0.00000    | 0.00000   | 0.00000    | 0.00000    | 0.00000    | 0.00000    | 0.00000    |
| mef(C)_1_AB571865         | 7.45123   | 21.87827   | 12.29212  | 32.90804   | 3.05080    | 5.21419    | 49.89794   | 6.24044    |
| mph(A)_1_D16251           | 89.02101  | 2.29572    | 6.98369   | 8.36110    | 20.40194   | 24.29786   | 34.21622   | 4.09721    |
| mph(A)_2_U36578           | 2.99755   | 0.00000    | 0.00000   | 0.00000    | 0.00000    | 0.00000    | 0.00000    | 0.00000    |
| mph(E)_1_DQ839391         | 97.48374  | 668.92414  | 39.52958  | 252.01140  | 319.72544  | 393.49663  | 574.43149  | 265.13631  |
| mph(F)_1_AM260957         | 0.00000   | 0.00000    | 1.18533   | 0.00000    | 0.00000    | 0.00000    | 0.00000    | 0.00000    |
| mph(G)_1_AB571865         | 6.57319   | 20.41732   | 10.51628  | 29.34098   | 1.89873    | 4.49412    | 50.15391   | 6.65462    |
| msr(C)_2_AF313494         | 1.83329   | 0.00000    | 0.00000   | 29.17954   | 52.23172   | 2.34521    | 5.50796    | 0.00000    |
| msr(D)_3_AF227520         | 32.93329  | 34.62985   | 19.44844  | 0.00000    | 9.56499    | 37.52880   | 7.76008    | 180.51284  |
| msr(E)_1_FR751518         | 652.64288 | 4246.86017 | 261.19198 | 1759.01904 | 1986.94219 | 2736.78705 | 3407.26054 | 1397.12855 |
| nimA_1_X71444             | 0.00000   | 0.00000    | 0.00000   | 1.50889    | 0.00000    | 2.09029    | 0.00000    | 0.00000    |
| nimE_1_AM042593           | 0.00000   | 0.00000    | 0.00000   | 0.00000    | 0.00000    | 0.00000    | 0.00000    | 0.23982    |
| oqxA_1_EU370913           | 31.85985  | 1.47387    | 2.12709   | 6.00790    | 3.25470    | 4.64049    | 11.68247   | 2.73161    |
| oqxB_1_EU370913           | 69.10917  | 28.69541   | 24.17412  | 39.96505   | 33.10186   | 24.34857   | 38.46162   | 28.25553   |
| poxA_1_MF095097           | 0.00000   | 0.00000    | 0.00000   | 22.35667   | 28.22407   | 19.58923   | 0.00000    | 24.75940   |
| qepA_1_FJ167861           | 0.00000   | 4.48551    | 0.00000   | 0.00000    | 0.00000    | 0.00000    | 0.00000    | 0.00000    |
| qnrA6_1_DQ151889          | 1.42569   | 0.00000    | 0.00000   | 0.44346    | 0.00000    | 0.35196    | 1.27343    | 0.00000    |
| qnrB43_1_JQ349151         | 0.00000   | 0.00000    | 0.00000   | 1.41177    | 0.00000    | 1.21908    | 0.40967    | 0.00000    |
| qnrB60_1_AB734055         | 0.00000   | 0.00000    | 0.22813   | 0.00000    | 0.00000    | 0.00000    | 0.00000    | 0.00000    |
| qnrS5_1_HQ631377          | 0.00000   | 0.00000    | 0.00000   | 0.00000    | 0.00000    | 0.00000    | 0.00000    | 0.97806    |
| qnrVC1_1_EU436855         | 0.37518   | 0.32977    | 0.00000   | 0.00000    | 0.00000    | 0.00000    | 0.00000    | 0.00000    |
| str_2_FN435330            | 0.46454   | 0.00000    | 0.17332   | 0.00000    | 0.00000    | 0.00000    | 0.67425    | 1.34532    |
| sul1_38_BX248359          | 157.46302 | 952.21802  | 27.75928  | 408.51686  | 106.16778  | 234.41568  | 384.53112  | 11.73083   |
| sul2_12_AF497970          | 56.07602  | 112.91549  | 9.89021   | 137.47959  | 49.68677   | 74.26624   | 103.87082  | 3.77772    |
| tet(32)_1_EU722333        | 20.72095  | 13.20263   | 2.64401   | 2.21928    | 2.91732    | 31.93976   | 26.97079   | 2.50966    |
| tet(33)_1_AY255627        | 0.00000   | 0.00000    | 1.86335   | 0.00000    | 0.00000    | 0.00000    | 1.87072    | 0.00000    |
| tet(36)_1_AJ514254        | 0.00000   | 0.00000    | 1.20516   | 0.00000    | 0.00000    | 0.00000    | 0.00000    | 0.00000    |
| tet(39)_1_KT346360        | 71.35601  | 133.70267  | 33.76986  | 545.31157  | 78.71052   | 326.12398  | 712.15679  | 362.91041  |
| tet(40)_2_AM419751        | 40.05285  | 11.92421   | 8.61659   | 9.18678    | 17.12643   | 108.78226  | 21.49405   | 1.22777    |
| tet(42)_1_EU523697        | 3.29426   | 6.19505    | 0.00000   | 35.59839   | 6.09306    | 0.00000    | 13.13833   | 0.00000    |
| tet(44)_2_FN594949        | 6.22966   | 3.17721    | 0.00000   | 0.00000    | 0.00000    | 3.89605    | 3.84696    | 0.00000    |
| tet(A)_3_AY196695         | 26.50960  | 15.72450   | 4.12612   | 38.86698   | 12.24193   | 27.53878   | 27.01959   | 19.54650   |
| tet(B)_1_AP000342         | 4.41483   | 4.09603    | 0.00000   | 5.25449    | 0.00000    | 7.93802    | 7.88668    | 0.00000    |
| tet(C)_2_AY046276         | 56.19911  | 7.45335    | 22.08413  | 27.20679   | 5.90352    | 9.04675    | 13.81166   | 15.46896   |
| tet(D)_1_AF467077         | 0.00000   | 1.46267    | 0.00000   | 0.00000    | 0.00000    | 0.78055    | 1.18910    | 0.00000    |
| tet(E)_1_Y19116           | 0.00000   | 0.00000    | 0.00000   | 0.00000    | 0.00000    | 0.76400    | 1.16389    | 6.54502    |
| tet(G)_2_AF133140         | 32.97755  | 15.15506   | 21.04745  | 24.79461   | 12.67971   | 14.52599   | 30.95085   | 2.90877    |
| tet(H)_2_AJ245947         | 3.70669   | 0.50680    | 0.00000   | 0.00000    | 0.00000    | 2.00909    | 0.00000    | 1.55057    |
| tet(L)_7_X60828           | 0.00000   | 0.00000    | 0.00000   | 0.52896    | 18.77934   | 14.97926   | 0.00000    | 0.00000    |
| tet(M)_9_X56353           | 34.25904  | 4.80443    | 29.46999  | 5.91479    | 61.52119   | 45.06627   | 11.82752   | 12.09540   |
| tet(O)_3_Y07780           | 73.71729  | 49.62835   | 21.78433  | 17.46975   | 45.94784   | 217.00247  | 55.59285   | 6.19050    |

|                                 |           |           |          |           |          |           |           |          |
|---------------------------------|-----------|-----------|----------|-----------|----------|-----------|-----------|----------|
| <b>tet(O/32/O)_2_AJ295238</b>   | 8.55028   | 5.95811   | 0.57478  | 1.99167   | 0.00000  | 10.76702  | 0.00000   | 0.00000  |
| <b>tet(O/W/32/O)_5_JQ740053</b> | 31.50509  | 21.39503  | 8.21942  | 4.60928   | 1.16693  | 69.15463  | 20.57211  | 1.28272  |
| <b>tet(Q)_2_X58717</b>          | 197.34849 | 146.33057 | 52.16485 | 21.73006  | 43.54848 | 141.69939 | 51.25066  | 6.41671  |
| <b>tet(S/M)_2_AY534326</b>      | 1.45447   | 0.00000   | 0.00000  | 20.07570  | 2.10192  | 0.00000   | 1.50427   | 1.10848  |
| <b>tet(W)_3_AJ427421</b>        | 379.47901 | 184.95548 | 66.02108 | 49.73701  | 56.19076 | 990.86006 | 209.12869 | 17.55734 |
| <b>tet(X)_1_GU014535</b>        | 85.84011  | 251.74723 | 34.67422 | 160.78047 | 31.35810 | 116.35218 | 268.65610 | 14.19155 |
| <b>tet(X)_3_AB097942</b>        | 0.00000   | 0.00000   | 1.03532  | 0.00000   | 4.92635  | 0.00000   | 0.00000   | 0.00000  |
| <b>VanG2XY_1_FJ872410</b>       | 0.68055   | 0.00000   | 0.00000  | 0.00000   | 0.00000  | 0.00000   | 0.72944   | 0.00000  |
| <b>VanHAX_2_M97297</b>          | 0.00000   | 1.69537   | 0.02822  | 19.30613  | 58.11818 | 6.56372   | 6.18198   | 0.00000  |
| <b>VanHBX_1_AF192329</b>        | 0.43493   | 0.00000   | 0.00000  | 0.00000   | 0.00000  | 5.00262   | 1.31747   | 0.00000  |
| <b>vat(F)_1_AF170730</b>        | 0.00000   | 0.00000   | 0.00000  | 0.00000   | 0.00000  | 0.00000   | 0.00000   | 2.73325  |
